# Supplementary material for: Novel pyrazolyazoindole derivatives as photoswitches: design, synthesis, and photoswitching behavior research combined with theoretical methods
Source: Royal Society of Chemistry journal article supplement (doi:10.1039/d2nj03526j), 2022-01-01
Supplement: d2nj03526j1.pdf [file d2nj03526j1.pdf]

## Supporting Information

Novel pyrazolyazoindole derivatives as photoswitches: design, synthesis, and photoswitching behavior research combine with theoretical methods

Haoran Hu, Bitao Jiang, Bo Zhang, Rong Wang, Chong Zhang, Chengguo Sun and Bingcheng Hu\*

School of Chemical Engineering, Nanjing University of Science and Technology, Nanjing, Jiangsu 210094, China.

Corresponding author. E-mail address: E-mail: hubc@njust.edu.cn (B. Hu)

|                                                                                                         |      |
|---------------------------------------------------------------------------------------------------------|------|
| 1 Synthesis.....                                                                                        | S2   |
| 1.1 Specific synthesis steps.....                                                                       | S2   |
| 1.2 spectrograms of target compounds.....                                                               | S6   |
| 1.3 Crystal structure information.....                                                                  | S24  |
| 2 Photochemical research.....                                                                           | S28  |
| 2.1 UV/Vis spectra for the manuscript text.....                                                         | S29  |
| 2.2 Determination of PSS compositions using <sup>1</sup> H NMR in DMSO- <i>d</i> <sub>6</sub> .....     | S43  |
| 2.3 The thermal half-lives of title compounds.....                                                      | S49  |
| 2.4 First-order kinetics analysis thermal isomerization of <b>A9</b> , <b>A11</b> , and <b>B7</b> ..... | S52  |
| 3 Biological application.....                                                                           | S54  |
| 3.1 Photoisomerization and half-lives in 10% phosphate buffer (pH 7.5)-DMSO mixture.....                | S54  |
| 3.2 the information of bi-functional model molecule <b>C1</b> .....                                     | S55  |
| 4 DFT calculations.....                                                                                 | S57  |
| 4.1 Computed and experimental UV/Vis Spectra.....                                                       | S57  |
| 4.2 the energy of calculations.....                                                                     | S58  |
| 4.3 The diagrams and energy for Frontier MOs of compounds.....                                          | S58  |
| 4.4 XYZ coordinates optimized molecular geometry of title compounds.....                                | S71  |
| 5 Reference.....                                                                                        | S111 |
| Other information                                                                                       |      |

# 1 Synthesis

## 1.1 Specific synthesis steps

### Synthesis of intermediates **3a** and **3b** (**A1** and **B1**)

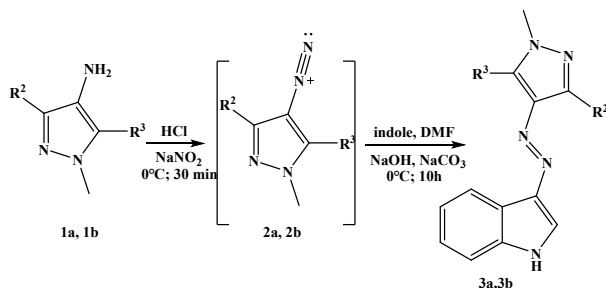

**1** (**1a** and **1b**, 10 mmol, 1 eq.) was dissolved in 30 mL of water, followed by the addition of 5 mL of HCl (12.2 mol/L, 57 mmol). After the solution was cooled under 0°C, a pre-cooling solution of NaNO<sub>2</sub> (0.9 g, 13 mmol, 1.3 eq.) in 30 mL water was slowly added. After the mixture was stirred for 30 min in a 0°C ice-salt bath, a pre-cooling solution of indole (1.4 g, 12 mmol, 1.2 eq.) and NaOH (1 g, 27 mmol) in 20 mL of water was slowly added. Then, a pre-cooling solution of Na<sub>2</sub>CO<sub>3</sub> (3.8 g, 33 mmol) in 30 mL of water was slowly drip added. The brownish yellow solid precipitated continuously. After stirred for 3 hours, filtered and wash with water and dry to obtained yellow solid.<sup>S1</sup> The crude product was subjected to flash silica gel column chromatography (ethyl acetate-Petroleum ether: 2:1) to afford the pure compounds **3** (**3a** and **3b**).

**3a** (**A1**): Yellow solid, yield 95 %; <sup>1</sup>H NMR (500 MHz, DMSO) δ 11.85 (s, 1H), 8.27 (d, *J* = 7.9 Hz), 8.25 (s, 1H), 8.15 (s, 1H), 7.85 (s, 1H), 7.46 (d, *J* = 8.1 Hz, 1H), 7.24 (t, *J* = 7.5 Hz, 1H), 7.18 (t, *J* = 7.5 Hz, 1H), 3.91 (s, 3H); <sup>13</sup>C NMR (126 MHz, DMSO) δ 142.31, 136.92, 135.64, 131.69, 131.17, 126.26, 123.88, 122.46, 122.32, 118.81, 112.55, 39.50; HRMS (ESI) *m/z* calcd for C<sub>12</sub>H<sub>11</sub>N<sub>5</sub> [M + H]<sup>+</sup> 226.1087, found 226.1086.

**3b** (**B1**): Light yellow solid, yield 92 %; <sup>1</sup>H NMR (500 MHz, DMSO) δ 11.72 (s, 1H), 8.29 (d, *J* = 7.9 Hz, 1H), 8.07 (s, 1H), 7.44 (d, *J* = 7.9 Hz, 1H), 7.22 (t, *J* = 7.3 Hz, 1H), 7.17 (t, *J* = 7.3 Hz, 1H), 3.73 (s, 3H), 2.55 (s, 3H), 2.39 (s, 3H); <sup>13</sup>C NMR (126 MHz, DMSO) δ 139.79, 136.85, 136.35, 136.12, 135.02, 129.81, 127.79, 123.57, 122.40, 122.07, 118.78, 112.44, 99.99, 36.25, 14.10, 10.03; HRMS (ESI) *m/z* calcd for C<sub>12</sub>H<sub>11</sub>N<sub>5</sub> [M + H]<sup>+</sup> 372.1712, found 372.1700; HRMS (ESI) *m/z* calcd for C<sub>12</sub>H<sub>11</sub>N<sub>5</sub> [M + H]<sup>+</sup> 254.1400, found 254.1397.

Synthesis of title compounds **A2-A5**, **B2**, and **B3**.

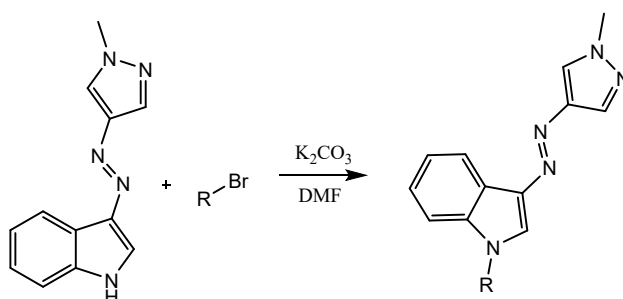

intermediate **3** (3 mmol) was dissolved in DMF (30ml) and added to a single-necked flask, and then the corresponding bromide, KOH. Reacted at 80° for 3-5 hours, After the reaction, added 40ml of water, extracted ethyl acetate (40ml×3), dried and evaporated solvent, purification by column chromatography (ethyl acetate-Petroleum ether: 1:1) gave the products **A2-A5, B2, and B3**.<sup>S2</sup>

**A2:** yellow solid, yield 89 %; <sup>1</sup>H NMR (500 MHz, DMSO-*d*<sub>6</sub>) δ 8.26 (d, *J* = 7.8 Hz, 1H), 8.24 (s, 1H), 8.15 (s, 1H), 7.84 (s, 1H), 7.52 (d, *J* = 8.1 Hz, 1H), 7.30 (t, *J* = 7.6 Hz, 1H), 7.22 (t, *J* = 7.5 Hz, 1H), 3.89 (s, 3H), 3.87 (s, 3H). <sup>13</sup>C NMR (126 MHz, DMSO) δ 142.31, 137.43, 134.56, 134.49, 131.81, 126.17, 123.91, 122.60, 122.53, 119.30, 110.83, 39.51, 33.45; HRMS (ESI) *m/z* calcd for C<sub>12</sub>H<sub>11</sub>N<sub>5</sub> [M + H]<sup>+</sup> 240.1244, found 240.1241.

**A3:** yellow solid, yield 92 %; <sup>1</sup>H NMR (500 MHz, DMSO-*d*<sub>6</sub>) δ 8.29 (d, *J* = 7.9 Hz, 1H), 8.24 (s, 1H), 8.23 (s, 1H), 7.59 (d, *J* = 8.3 Hz, 1H), 7.30 (t, *J* = 7.6 Hz, 1H), 7.22 (t, *J* = 7.4 Hz, 1H), 4.30 (q, *J* = 7.2 Hz, 2H), 3.90 (s, 3H), 1.49 – 1.39 (m, 3H); <sup>13</sup>C NMR (126 MHz, DMSO) δ 142.32, 136.44, 134.66, 133.08, 131.70, 126.24, 123.88, 122.67, 122.53, 119.43, 110.83, 41.30, 39.51, 15.61; HRMS (ESI) *m/z* calcd for C<sub>12</sub>H<sub>11</sub>N<sub>5</sub> [M + H]<sup>+</sup> 254.1400, found 254.1397.

**A4:** yellow solid, yield 87 %; <sup>1</sup>H NMR (500 MHz, DMSO) δ 8.28 (t, *J* = 7.5 Hz, 1H), 8.25 (s, 1H), 8.22 (s, 1H), 7.85 (s, 1H), 7.60 (d, *J* = 8.2 Hz, 1H), 7.29 (t, *J* = 7.6 Hz, 1H), 7.22 (t, *J* = 7.5 Hz, 1H), 4.24 (t, *J* = 6.9 Hz, 1H), 3.90 (s, 1H), 1.85 (dt, *J* = 14.6, 7.2 Hz, 1H), 0.89 (t, *J* = 7.3 Hz, 1H); <sup>13</sup>C NMR (126 MHz, DMSO) δ 142.34, 136.79, 133.79, 133.77, 131.69, 126.27, 123.87, 122.64, 122.52, 119.37, 110.97, 47.91, 39.51, 23.29, 11.52; HRMS (ESI) *m/z* calcd for C<sub>12</sub>H<sub>11</sub>N<sub>5</sub> [M + H]<sup>+</sup> 268.1557, found 268.1551.

**A5:** yellow solid, yield 85 %; <sup>1</sup>H NMR (500 MHz, DMSO) δ 8.30 (d, *J* = 7.8 Hz, 1H), 8.26 (s, 1H), 8.18 (s, 1H), 7.87 (s, 1H), 7.53 (d, *J* = 8.1 Hz, 1H), 7.29 (t, *J* = 7.4 Hz, 1H), 7.22 (t, *J* = 7.5 Hz, 1H), 6.07 (ddd, *J* = 13.4, 10.2, 4.0 Hz, 1H), 5.21 (d, *J* = 10.2 Hz, 1H), 5.13 (d, *J* = 17.1 Hz, 1H), 4.93 (s, 2H), 3.90 (s, 3H); <sup>13</sup>C NMR (126 MHz, DMSO) δ 142.35, 136.76, 134.79, 134.09, 133.60, 131.81, 126.33, 122.69, 122.66, 119.53, 117.90, 111.18, 48.89, 39.52; HRMS (ESI) *m/z* calcd for C<sub>12</sub>H<sub>11</sub>N<sub>5</sub> [M + H]<sup>+</sup> 266.1445, found 266.1440.

**B2:** yellow solid, yield 84 %; <sup>1</sup>H NMR (500 MHz, DMSO) δ 8.29 (d, *J* = 7.9 Hz, 1H), 8.08 (s, 1H), 7.52 (d, *J* = 8.3 Hz, 1H), 7.29 (t, *J* = 7.6 Hz, 1H), 7.22 (t, *J* = 7.5 Hz, 1H), 3.88 (s, 3H), 3.72 (s, 3H), 2.53 (d, *J* = 17.3 Hz, 3H), 2.38 (s, 3H); <sup>13</sup>C NMR (126 MHz, DMSO) δ 136.80, 136.26, 129.97, 128.47, 125.35, 125.00, 121.41, 120.74, 119.31, 110.06, 100.66, 36.09, 32.88, 11.24, 8.86; HRMS (ESI) *m/z* calcd for C<sub>12</sub>H<sub>11</sub>N<sub>5</sub> [M + H]<sup>+</sup> 268.1557, found 268.1551.

**B3:** yellow solid, yield 80 %; <sup>1</sup>H NMR (500 MHz, DMSO) δ 8.30 (d, *J* = 7.8 Hz, 1H), 8.12 (s, 1H), 7.57 (d, *J* = 8.1 Hz, 1H), 7.27 (t, *J* = 7.6 Hz, 1H), 7.21 (t, *J* = 7.5 Hz, 1H), 4.22 (t, *J* = 6.9 Hz, 2H), 3.72 (s, 3H), 2.55 (s, 3H), 2.39 (s, 3H), 1.85 (h, *J* = 7.1 Hz, 2H), 0.88 (t, *J* = 7.3 Hz, 3H); <sup>13</sup>C NMR (126 MHz, DMSO) δ 139.79, 136.72, 136.41, 135.07, 135.04, 132.40, 123.57, 122.56, 122.25, 119.36, 110.82, 47.81, 36.25, 23.35, 14.10, 11.55, 10.03; HRMS (ESI) *m/z* calcd for C<sub>12</sub>H<sub>11</sub>N<sub>5</sub> [M + H]<sup>+</sup> 260.1870, found 260.1871.

### Synthesis of title compounds **A6** and **B4**.

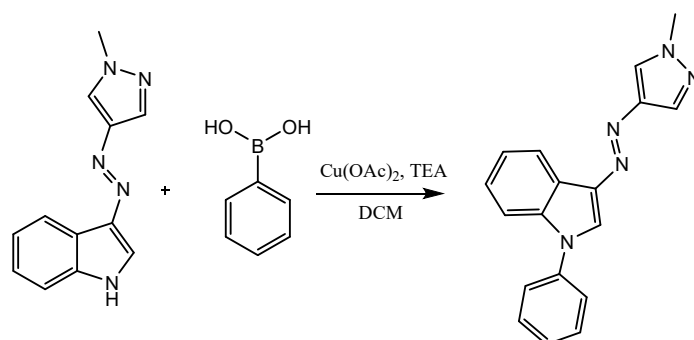

intermediate **3** (3 mmol) was dissolved in DCM (30ml) and added to a flask, and then the phenylboronic acid and TEA (1.3 ml, 9 mmol) and  $\text{Cu}(\text{OAc})_2$  (1.2 g, 6 mmol) in dichloromethane was slowly added dropwise to the mixed solution. Reacted at r.t. for 24 hours, After the reaction, filter and wash the solution, purification by column chromatography (ethyl acetate-Petroleum ether: 1:1) gave the products **A6** and **B4**.<sup>S3</sup>

**A6**: yellow solid, yield 63 %;  $^1\text{H}$  NMR (500 MHz, DMSO)  $\delta$  8.47 (s, 1H), 8.41 (d,  $J = 7.4$  Hz, 1H), 8.34 (s, 1H), 7.91 (s, 1H), 7.72 (d,  $J = 7.8$  Hz, 1H), 7.65 (t,  $J = 7.5$  Hz, 1H), 7.58 (d,  $J = 7.9$  Hz, 1H), 7.51 (t,  $J = 7.3$  Hz, 1H), 7.38 – 7.30 (m, 1H), 3.93 (s, 1H).  $^{13}\text{C}$  NMR (126 MHz, DMSO)  $\delta$  141.92, 138.09, 136.06, 135.85, 132.61, 131.53, 130.10, 127.68, 126.56, 124.65, 123.16, 122.71, 119.90, 111.03, 56.17; HRMS (ESI)  $m/z$  calcd for  $\text{C}_{12}\text{H}_{11}\text{N}_5$   $[\text{M} + \text{H}]^+$  302.1400, found 302.1402.

**B4**: yellow solid, yield 46 %;  $^1\text{H}$  NMR (500 MHz, DMSO)  $\delta$  8.42 (d,  $J = 6.7$  Hz, 1H), 8.37 (s, 1H), 7.72 (d,  $J = 7.6$  Hz, 2H), 7.64 (t,  $J = 7.3$  Hz, 3H), 7.58 (d,  $J = 8.4$  Hz, 2H), 7.50 (d,  $J = 6.7$  Hz, 2H), 7.32 (s, 2H), 3.75 (s, 3H), 2.59 (s, 3H), 2.42 (s, 3H);  $^{13}\text{C}$  NMR (126 MHz, DMSO)  $\delta$  135.22, 134.52, 130.44, 130.38, 127.79, 124.86, 124.70, 123.29, 122.92, 120.37, 118.85, 111.28, 36.31, 14.15, 10.10; HRMS (ESI)  $m/z$  calcd for  $\text{C}_{12}\text{H}_{11}\text{N}_5$   $[\text{M} + \text{H}]^+$  330.1713, found 330.1715.

### Synthesis of title compounds **A7**, **A8**, and **B5**.

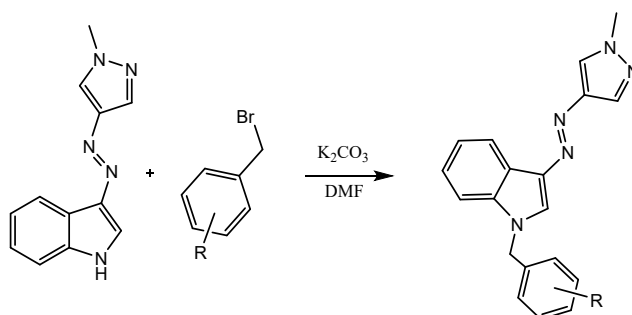

intermediate **3** (3 mmol) was dissolved in  $\text{CH}_3\text{CN}$  (20 ml), and then the benzyl bromide and or 3-Bromobenzyl bromide (3.6 mmol) and  $\text{K}_2\text{CO}_3$  (1.3 g, 9 mmol) was added to the solvent at  $80^\circ\text{C}$  for 4h, adding the reaction solution to 50ml of cold water, a large amount of yellow solid was



precipitated and purification by column chromatography (ethyl acetate-Petroleum ether: 1:1) gave the products **A7**, **A8**, and **B5**.

**A7**: yellow solid, yield 85 %;  $^1\text{H}$  NMR (500 MHz, DMSO)  $\delta$  8.37 (s, 1H), 8.27 (s, 1H), 8.27 (s, 1H), 7.87 (s, 1H), 7.56 (d,  $J$  = 8.1 Hz, 1H), 7.34 (d,  $J$  = 4.3 Hz, 1H), 7.30 – 7.19 (m, 1H), 5.53 (s, 1H), 3.91 (s, 1H);  $^{13}\text{C}$  NMR (126 MHz, DMSO)  $\delta$  142.34, 137.69, 136.72, 134.87, 133.91, 131.77, 129.14, 128.12, 127.73, 126.43, 122.72, 122.70, 119.69, 111.35, 50.00, 39.53; HRMS (ESI)  $m/z$  calcd for  $\text{C}_{12}\text{H}_{11}\text{N}_5$   $[\text{M} + \text{H}]^+$  316.1557, found 316.1550.

**A8**: yellow solid, yield 79 %;  $^1\text{H}$  NMR (500 MHz, DMSO)  $\delta$  8.41 (s, 1H), 8.29 (d,  $J$  = 5.9 Hz, 1H), 8.28 (s, 1H), 7.87 (s, 1H), 7.58 (d,  $J$  = 10.8 Hz, 2H), 7.49 (d,  $J$  = 6.9 Hz, 1H), 7.32 (d,  $J$  = 6.1 Hz, 1H), 7.31 – 7.19 (m, 3H), 5.54 (s, 2H), 3.91 (s, 3H);  $^{13}\text{C}$  NMR (126 MHz, DMSO)  $\delta$  142.28, 140.50, 136.63, 134.95, 133.82, 131.76, 131.36, 131.04, 130.49, 126.82, 126.51, 124.19, 122.83, 122.73, 122.36, 119.68, 111.27, 49.23, 39.54; HRMS (ESI)  $m/z$  calcd for  $\text{C}_{12}\text{H}_{11}\text{N}_5$   $[\text{M} + \text{H}]^+$  394.0662, found 394.0658.

**B5**: yellow solid, yield 80 %;  $^1\text{H}$  NMR (500 MHz, DMSO)  $\delta$  8.31 (d,  $J$  = 7.4 Hz, 1H), 8.27 (s, 1H), 7.54 (d,  $J$  = 7.9 Hz, 1H), 7.34 (d,  $J$  = 5.5 Hz, 4H), 7.28 (d,  $J$  = 4.0 Hz, 1H), 7.26 – 7.18 (m, 2H), 5.51 (s, 2H), 3.73 (s, 3H), 2.55 (s, 3H), 2.39 (s, 3H);  $^{13}\text{C}$  NMR (126 MHz, DMSO)  $\delta$  139.86, 137.92, 136.66, 135.40, 135.10, 132.56, 129.13, 128.08, 127.75, 123.79, 122.62, 122.46, 111.21, 49.89, 36.27, 14.13, 10.04; HRMS (ESI)  $m/z$  calcd for  $\text{C}_{12}\text{H}_{11}\text{N}_5$   $[\text{M} + \text{H}]^+$  344.1870, found 344.1865.

Synthesis of title compounds **A9-A11**, **B6** and **B7**.

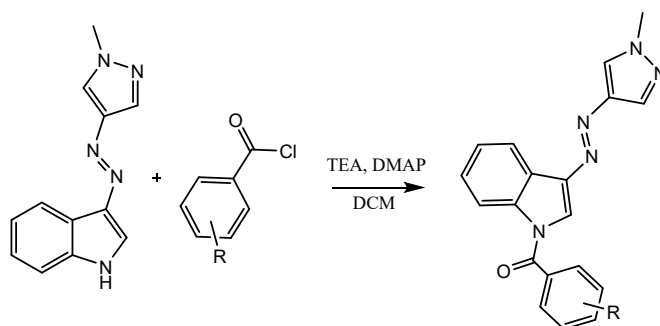

intermediate 3 (3 mmol) was dissolved in DCM (20 ml), and then the acid chloride or (3.6 mmol), DMAP (1.0, 8 g, 9 mmol) and TEA (1.3 ml, 9 mmol) was added to the solvent at  $0^\circ\text{C}$  to r.t. for 10h, concentrated solvent purification by column chromatography (ethyl acetate-Petroleum ether: 1:1) gave the products **A9-A11**, **B6** and **B7**.<sup>54</sup>

**A9**: yellow solid, yield 80 %;  $^1\text{H}$  NMR (500 MHz, DMSO)  $\delta$  8.44 (s, 1H), 8.38 (t,  $J$  = 7.4 Hz, 2H), 8.03 (s, 1H), 7.94 (s, 1H), 7.90 (d,  $J$  = 7.6 Hz, 2H), 7.76 (t,  $J$  = 7.4 Hz, 1H), 7.66 (t,  $J$  = 7.6 Hz, 2H), 7.53 (t,  $J$  = 7.7 Hz, 1H), 7.47 (t,  $J$  = 7.4 Hz, 1H), 3.92 (s, 3H);  $^{13}\text{C}$  NMR (126 MHz, DMSO)  $\delta$  168.79, 142.09, 137.61, 136.43, 133.82, 132.99, 132.10, 130.70, 130.69, 129.78, 129.31, 128.14, 126.81, 125.80, 122.99, 122.79, 116.34, 39.64; HRMS (ESI)  $m/z$  calcd for  $\text{C}_{12}\text{H}_{11}\text{N}_5$   $[\text{M} + \text{H}]^+$  330.1350, found 330.1346.

**A10:** yellow solid, yield 75 %;  $^1\text{H}$  NMR (500 MHz, DMSO)  $\delta$  8.45 (s, 1H), 8.38 (d,  $J = 8.1$  Hz, 2H), 8.09 (s, 1H), 8.05 (s, 1H), 7.95 (s, 1H), 7.93 (s, 1H), 7.89 (d,  $J = 7.6$  Hz, 1H), 7.61 (t,  $J = 7.9$  Hz, 1H), 7.53 (t,  $J = 7.7$  Hz, 1H), 7.47 (t,  $J = 7.6$  Hz, 1H), 3.93 (s, 3H);  $^{13}\text{C}$  NMR (126 MHz, DMSO)  $\delta$  167.34, 142.07, 137.83, 136.41, 136.12, 135.56, 132.12, 132.11, 131.43, 130.72, 128.22, 126.93, 125.96, 123.06, 122.88, 122.39, 116.42, 39.65; HRMS (ESI)  $m/z$  calcd for  $\text{C}_{12}\text{H}_{11}\text{N}_5$   $[\text{M} + \text{H}]^+$  408.0455, found 408.0451.

**A11:** yellow solid, yield 85 %;  $^1\text{H}$  NMR (500 MHz, DMSO)  $\delta$  8.57 (s, 1H), 8.45 (s, 1H), 8.28 (d,  $J = 7.9$  Hz, 1H), 8.06 – 8.00 (m, 3H), 7.95 (s, 1H), 7.49 – 7.36 (m, 4H), 3.93 (s, 3H), 2.32 (s, 3H);  $^{13}\text{C}$  NMR (126 MHz,  $\text{CDCl}_3$ )  $\delta$  145.54, 142.37, 138.85, 135.20, 134.79, 133.18, 130.11, 128.45, 127.09, 126.09, 124.87, 123.37, 122.84, 113.41, 39.63, 21.63; HRMS (ESI)  $m/z$  calcd for  $\text{C}_{12}\text{H}_{11}\text{N}_5$   $[\text{M} + \text{H}]^+$  380.1176, found 380.1173.

**B6:** yellow solid, yield 84 %;  $^1\text{H}$  NMR (500 MHz, DMSO)  $\delta$  8.40 (d,  $J = 7.8$  Hz, 1H), 8.37 (d,  $J = 8.0$  Hz, 1H), 7.96 (s, 1H), 7.88 (d,  $J = 7.7$  Hz, 2H), 7.75 (t,  $J = 6.9$  Hz, 1H), 7.66 (t,  $J = 7.0$  Hz, 2H), 7.52 – 7.44 (m, 2H), 3.74 (s, 3H), 2.57 (s, 3H), 2.36 (s, 3H);  $^{13}\text{C}$  NMR (126 MHz,  $\text{CDCl}_3$ )  $\delta$  168.75, 142.08, 139.04, 136.67, 135.76, 134.77, 134.14, 132.32, 129.36, 128.85, 128.36, 126.27, 125.29, 123.26, 122.93, 116.33, 36.05, 13.93, 10.22; HRMS (ESI)  $m/z$  calcd for  $\text{C}_{12}\text{H}_{11}\text{N}_5$   $[\text{M} + \text{H}]^+$  358.1663, found 358.1660.

**B7:** yellow solid, yield 78 %;  $^1\text{H}$  NMR (500 MHz, DMSO)  $\delta$  8.44 (s, 1H), 8.28 (d,  $J = 7.4$  Hz, 1H), 8.03 – 7.98 (m, 1H), 7.49 – 7.36 (m, 2H), 3.75 (s, 1H), 2.57 (s, 1H), 2.40 (s, 1H), 2.33 (s, 1H);  $^{13}\text{C}$  NMR (126 MHz,  $\text{CDCl}_3$ )  $\delta$  145.36, 142.33, 139.38, 135.65, 135.23, 134.94, 130.05, 127.06, 126.58, 125.81, 124.66, 123.23, 123.16, 113.45, 36.04, 21.63, 13.86, 10.21; HRMS (ESI)  $m/z$  calcd for  $\text{C}_{12}\text{H}_{11}\text{N}_5$   $[\text{M} + \text{H}]^+$  408.1489, found 408.1484.

## 1.2 spectrograms of target compounds

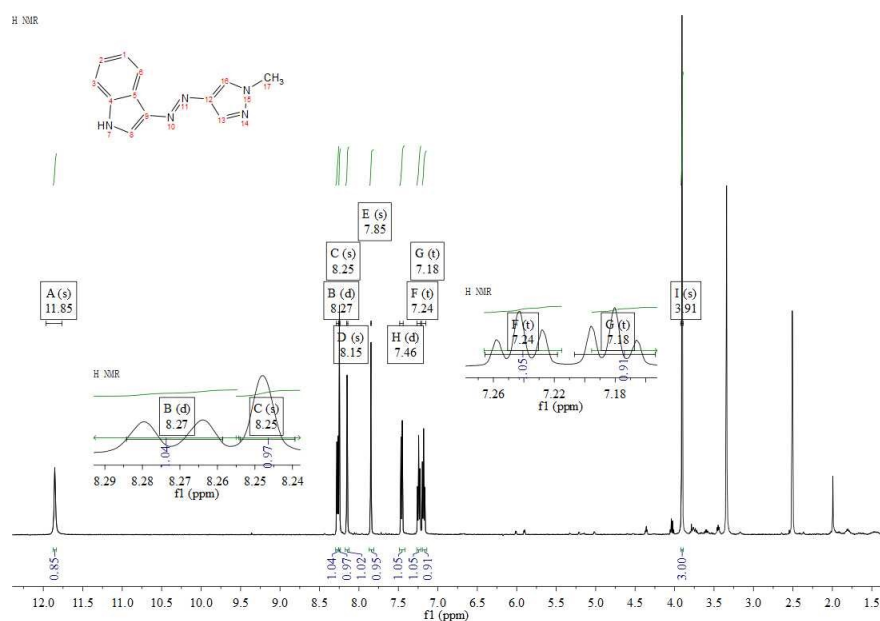

Figure S1.  $^1\text{H}$  NMR spectrum of **A1** in  $\text{DMSO}-d_6$ .



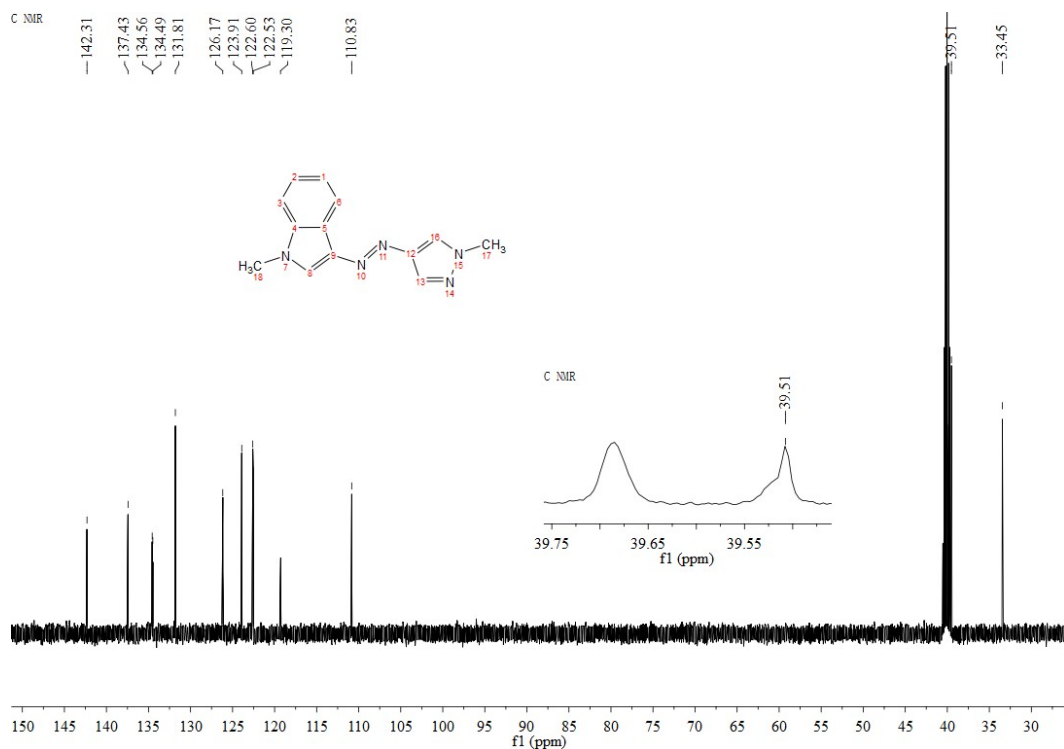

Figure S4.  $^{13}\text{C}$  NMR spectrum of **A2** in  $\text{DMSO-}d_6$ .

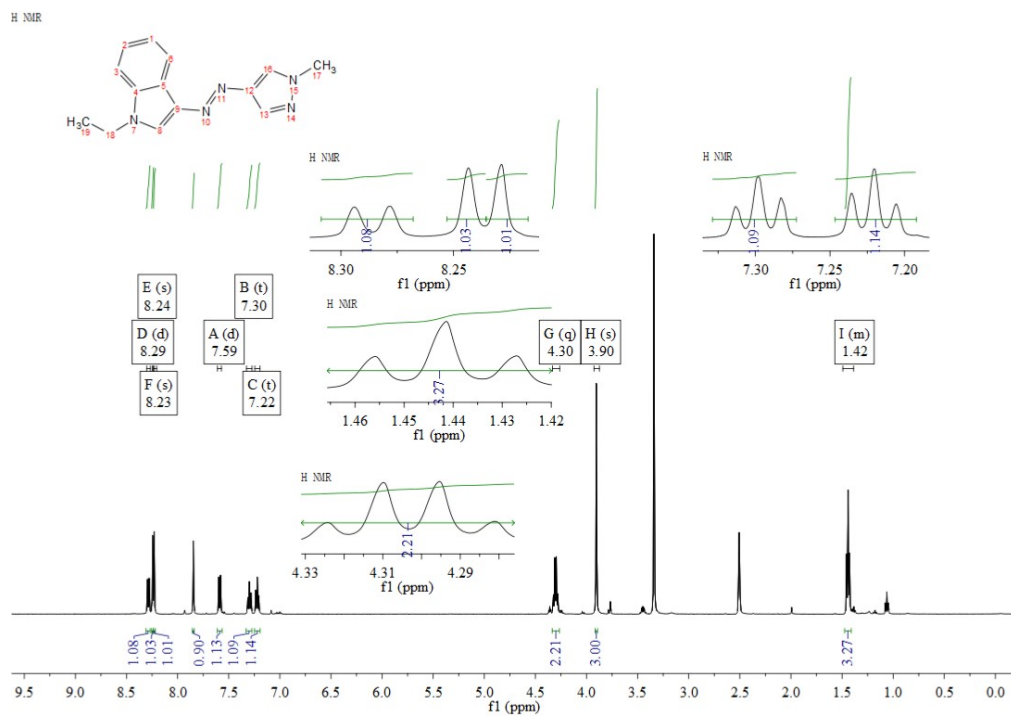

Figure S5.  $^1\text{H}$  NMR spectrum of **A3** in  $\text{DMSO-}d_6$ .

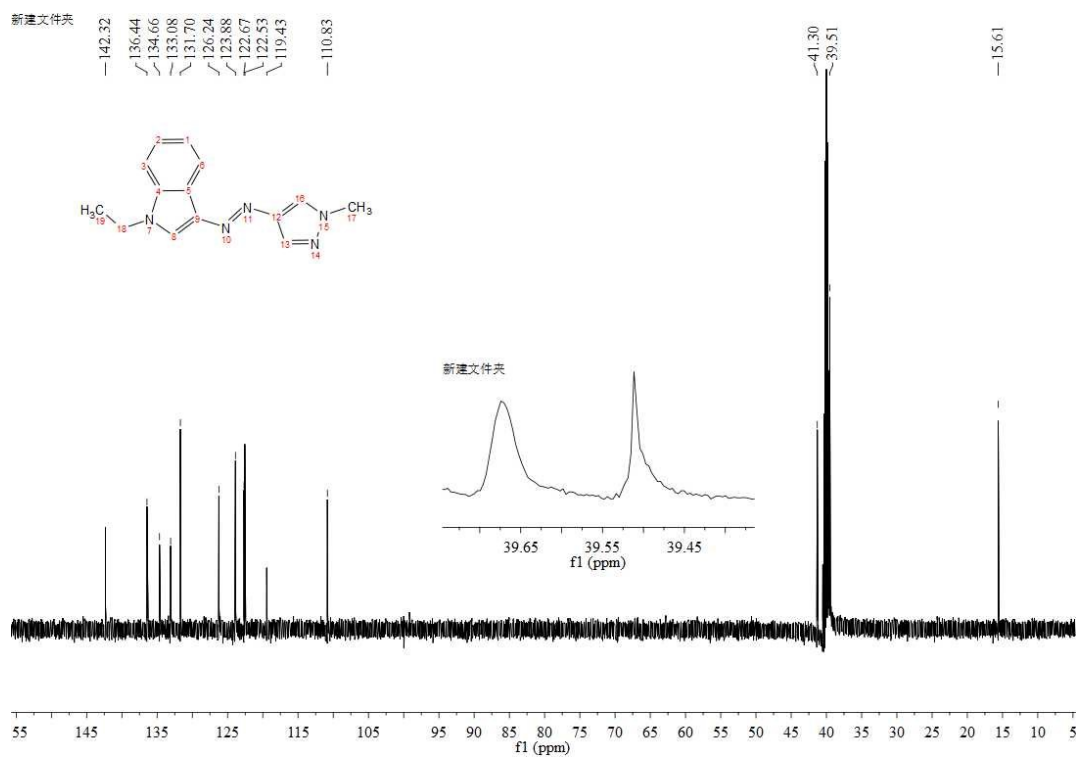

Figure S6. <sup>13</sup>H NMR spectrum of A3 in DMSO-*d*<sub>6</sub>.

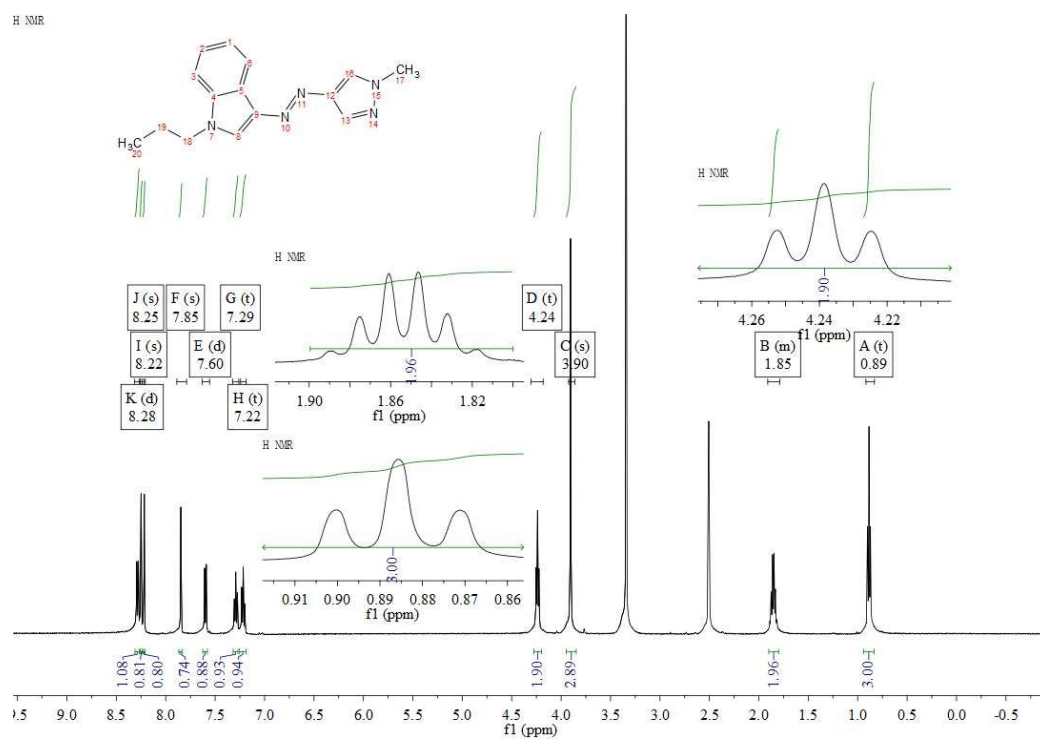

Figure S7. <sup>1</sup>H NMR spectrum of A4 in DMSO-*d*<sub>6</sub>.



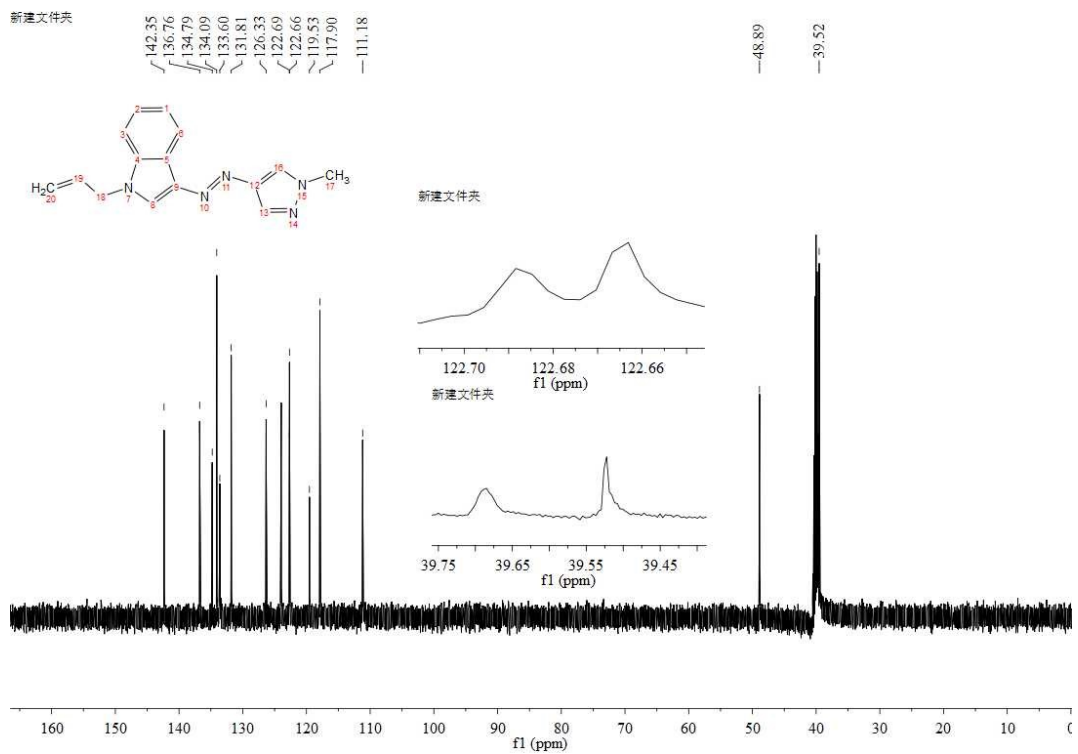

Figure S10.  $^{13}\text{C}$  NMR spectrum of **A5** in  $\text{DMSO-}d_6$ .

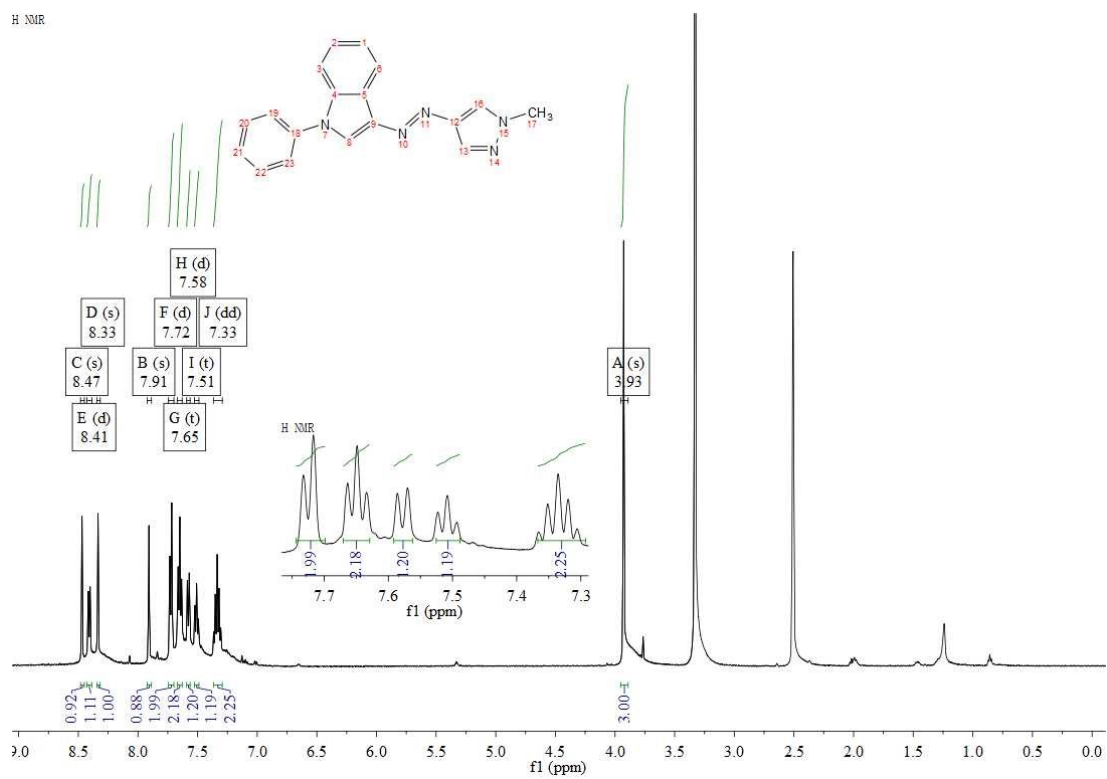

Figure S11.  $^1\text{H}$  NMR spectrum of compound **A6**  $\text{DMSO-}d_6$ .

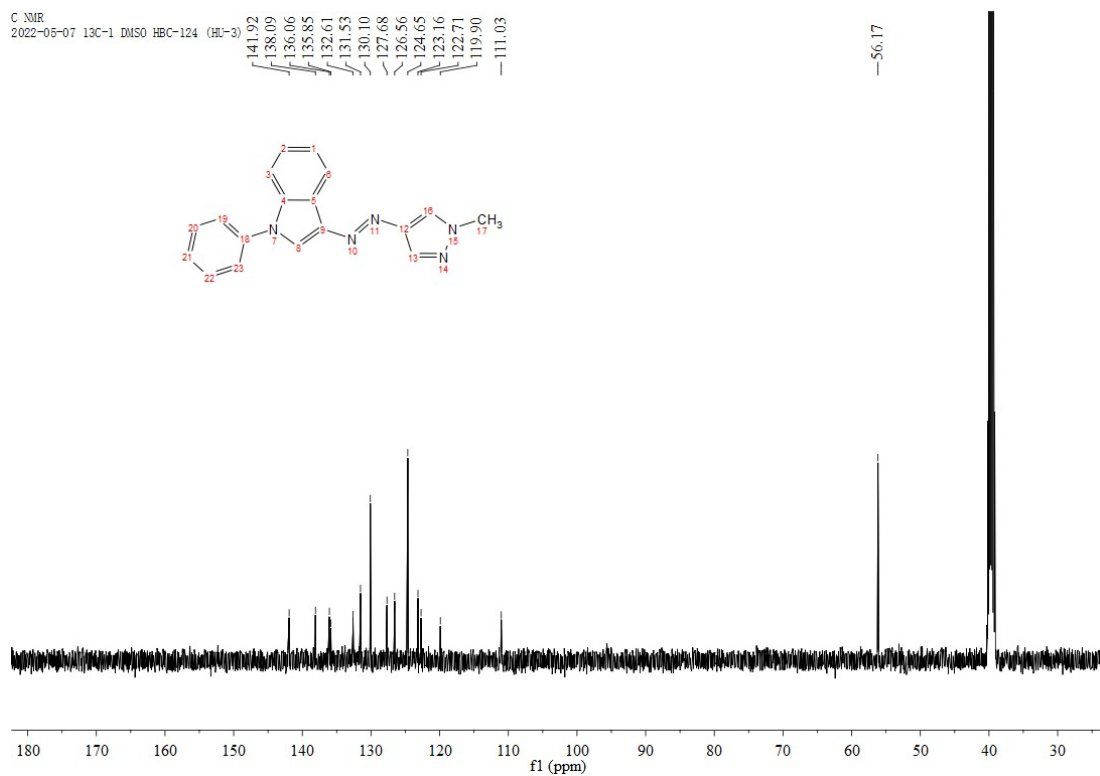

Figure S12.  $^{13}\text{C}$  NMR spectrum of compound **A6**  $\text{DMSO-}d_6$ .

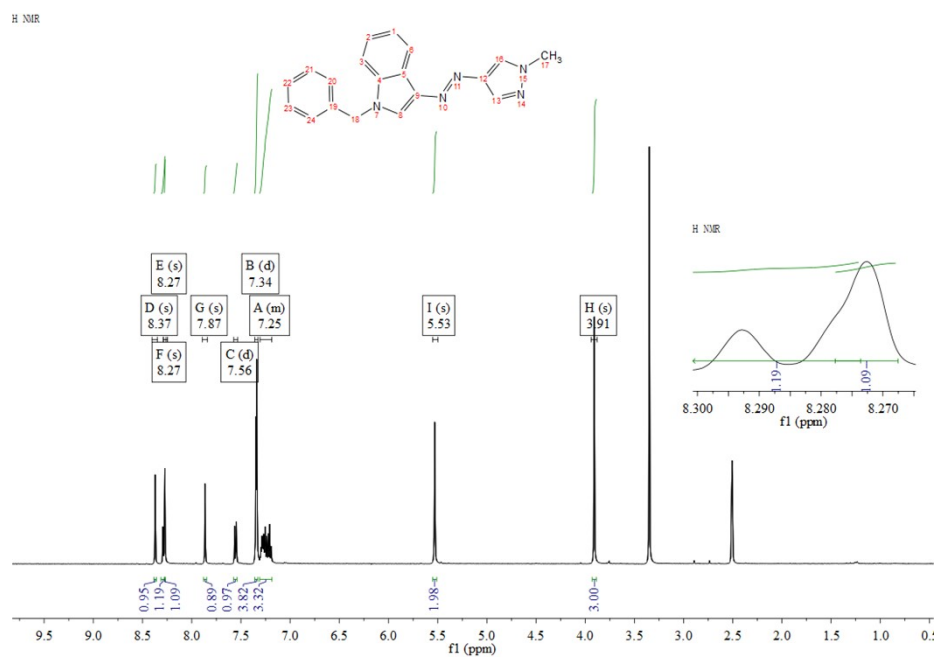

Figure S13.  $^1\text{H}$  NMR spectrum of **A7** in  $\text{DMSO-}d_6$ .



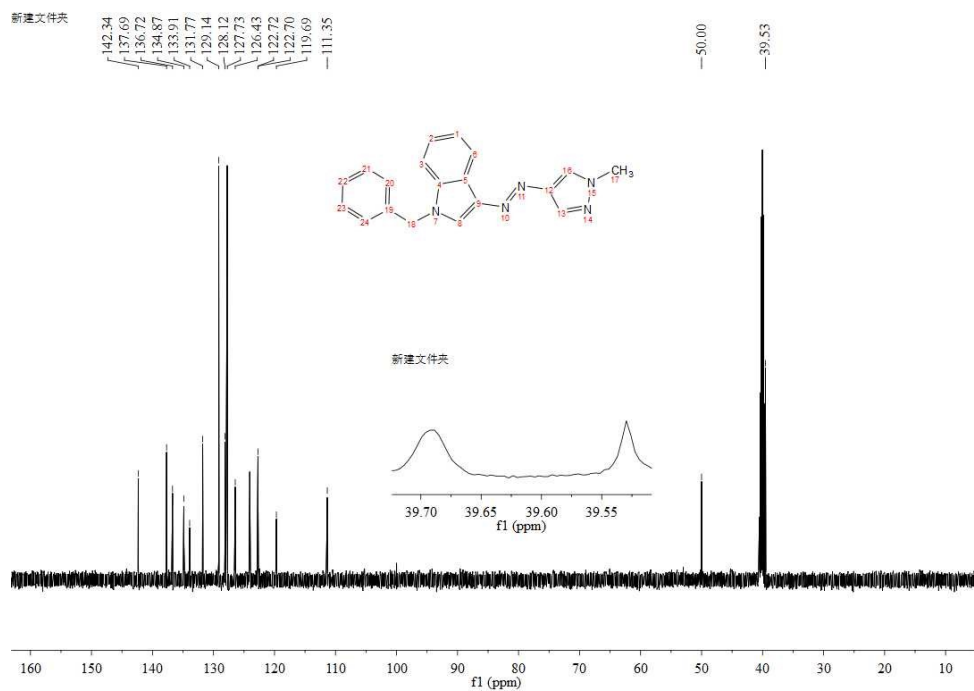

Figure S14.  $^{13}\text{C}$  NMR spectrum of **A7** in  $\text{DMSO-}d_6$ .

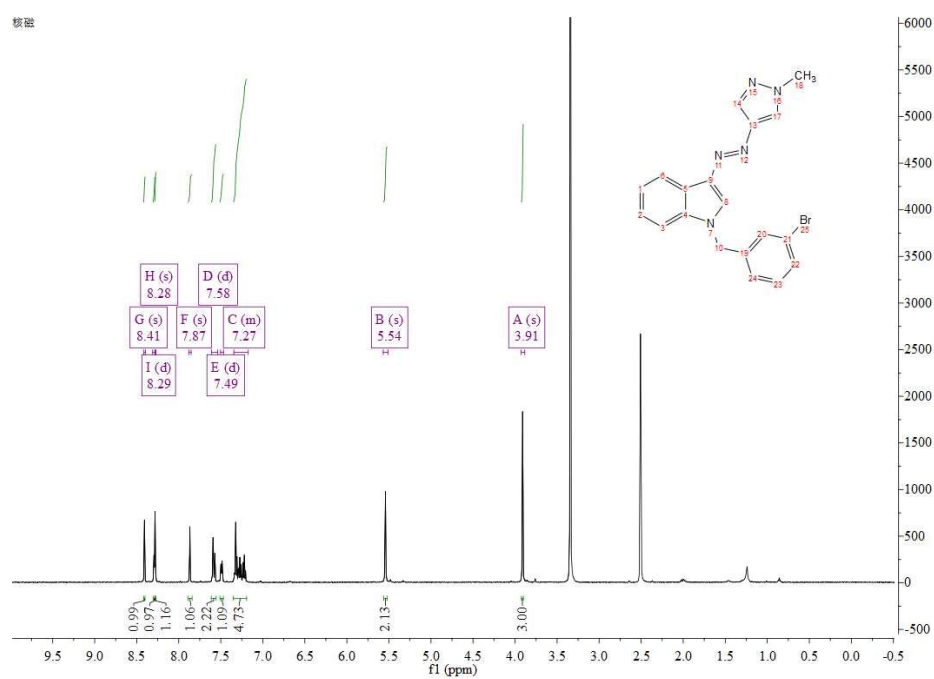

Figure S15.  $^1\text{H}$  NMR spectrum of **A8** in  $\text{DMSO-}d_6$ .

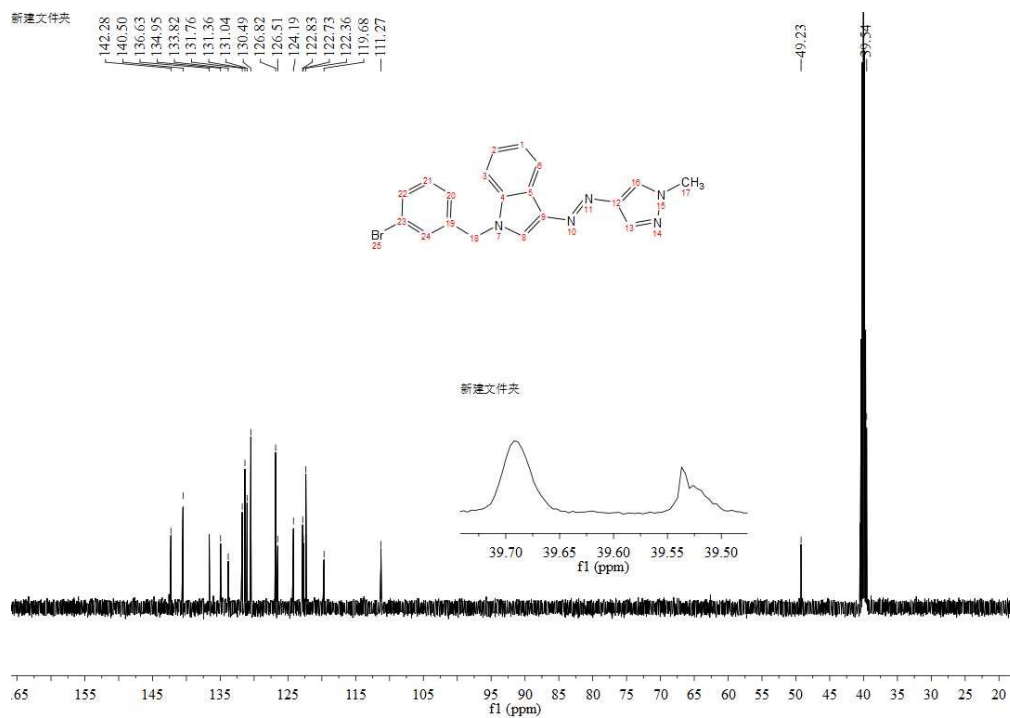

Figure S16.  $^{13}\text{C}$  NMR spectrum of **A8** in  $\text{DMSO-}d_6$ .

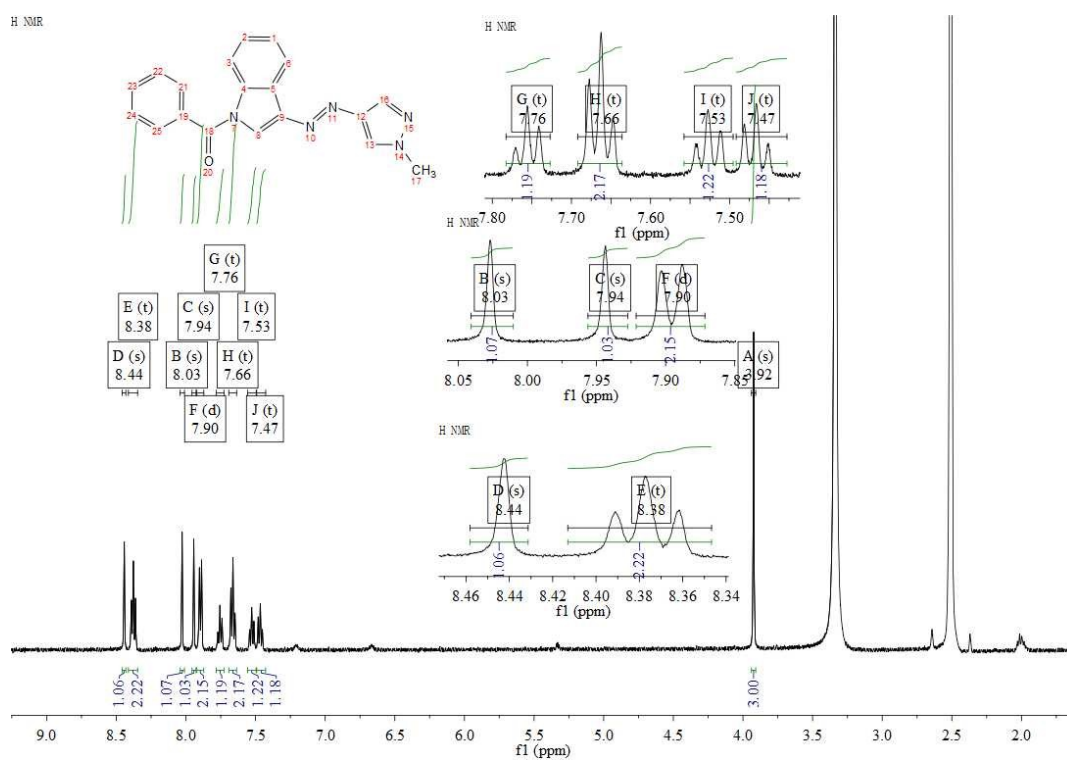

Figure S17.  $^1\text{H}$  NMR spectrum of **A9** in  $\text{DMSO-}d_6$ .

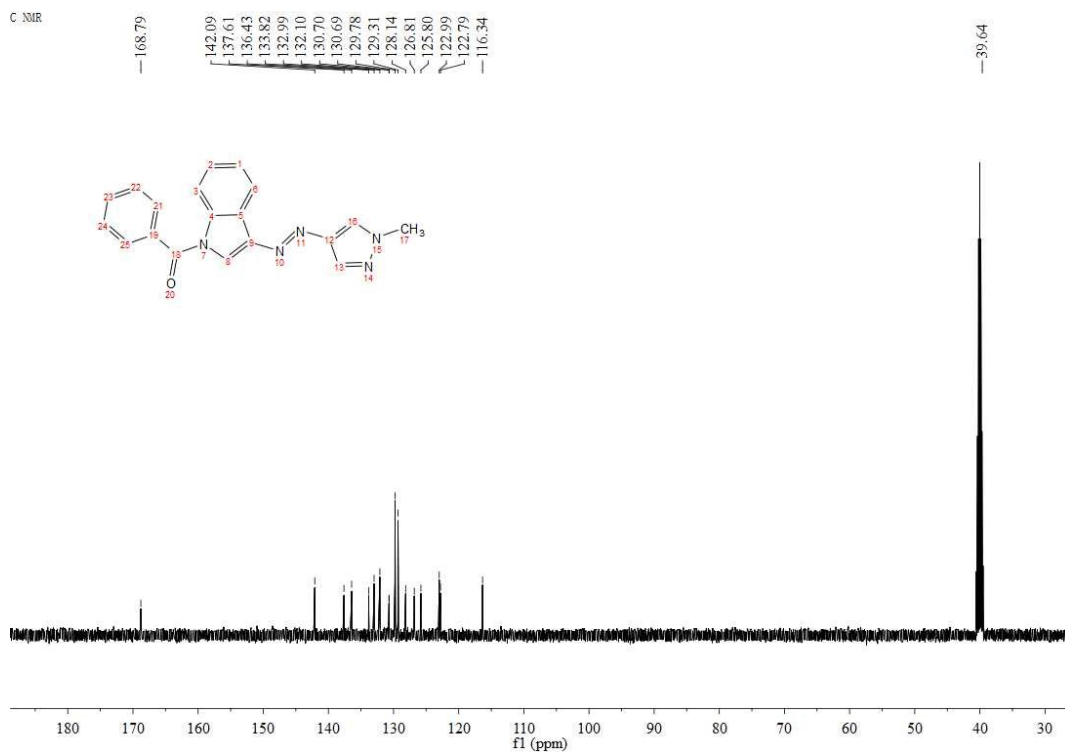

Figure S18.  $^{13}\text{C}$  NMR spectrum of **A9** in  $\text{DMSO-}d_6$ .

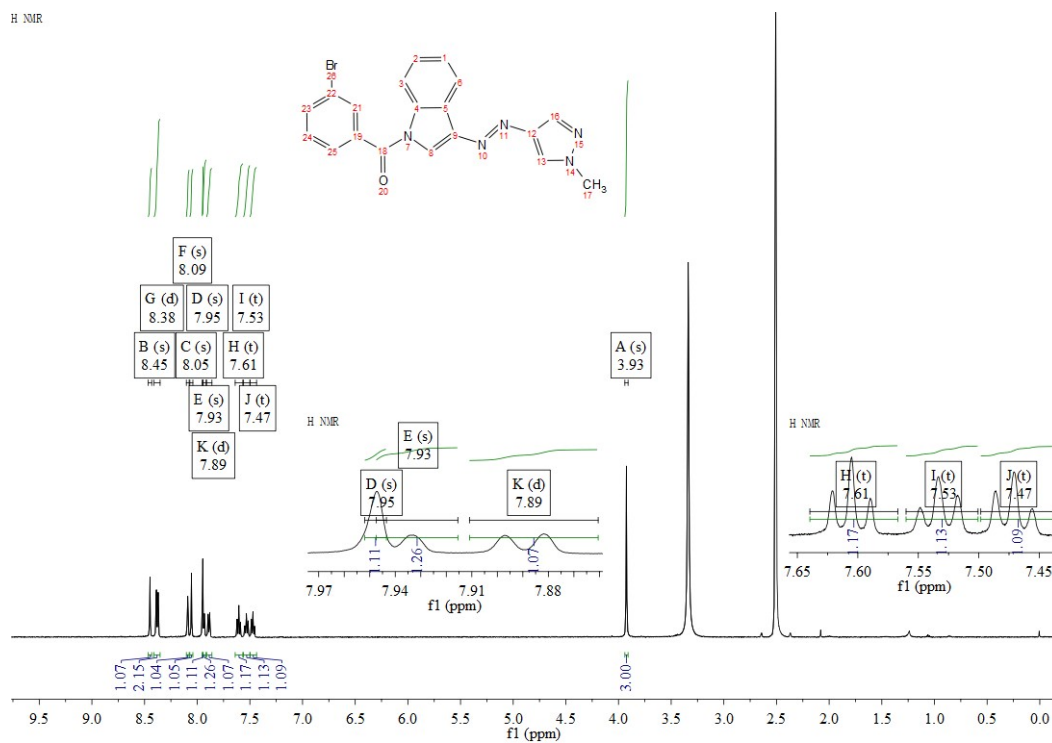

Figure S19.  $^1\text{H}$  NMR spectrum of **A10** in  $\text{DMSO-}d_6$ .

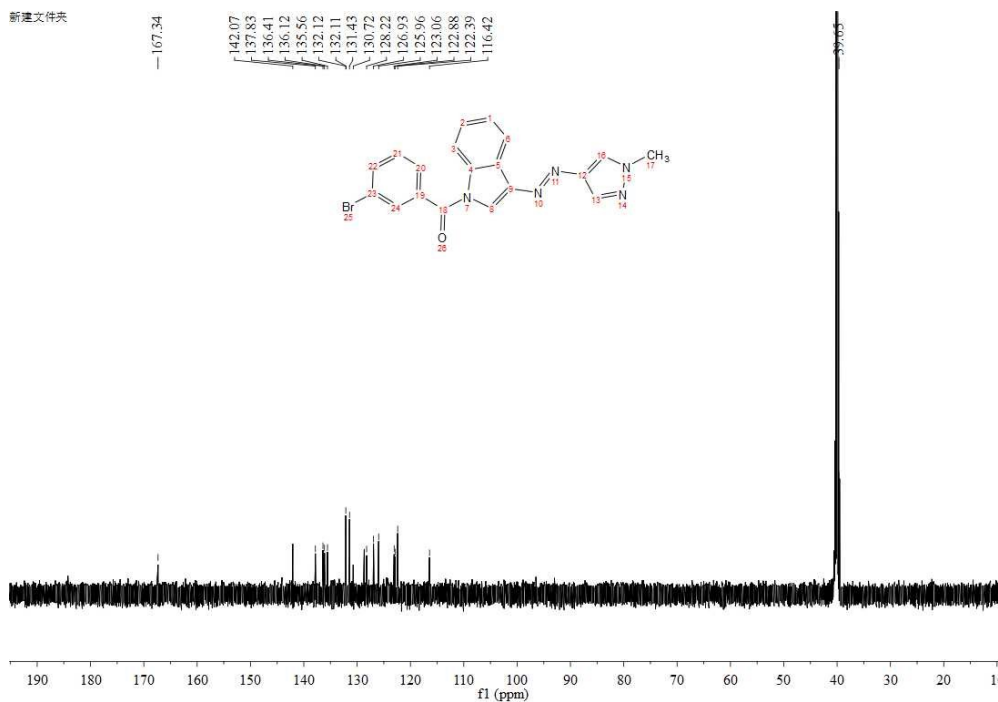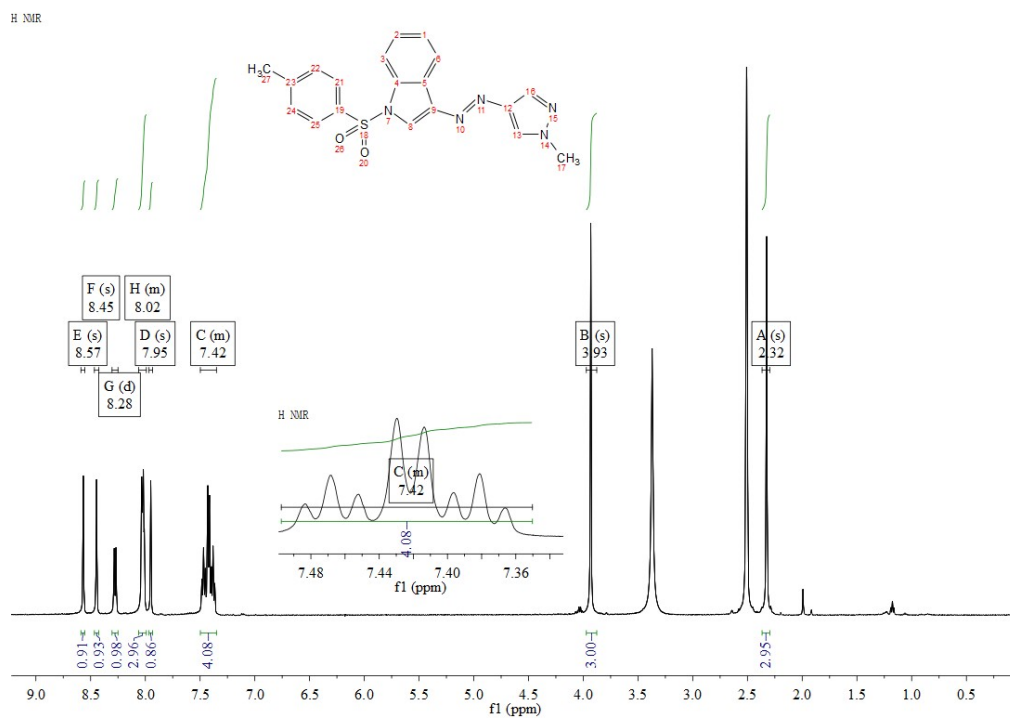

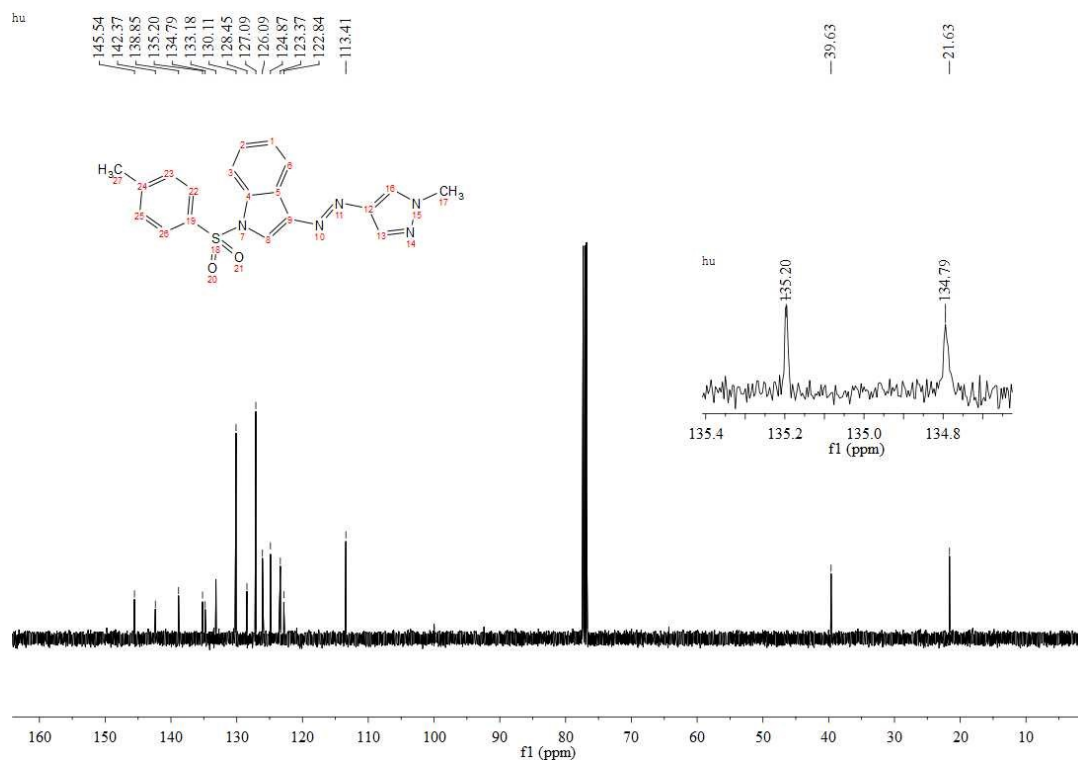

Figure S22.  $^{13}\text{C}$  NMR spectrum of **A11** in  $\text{CDCl}_3$ .

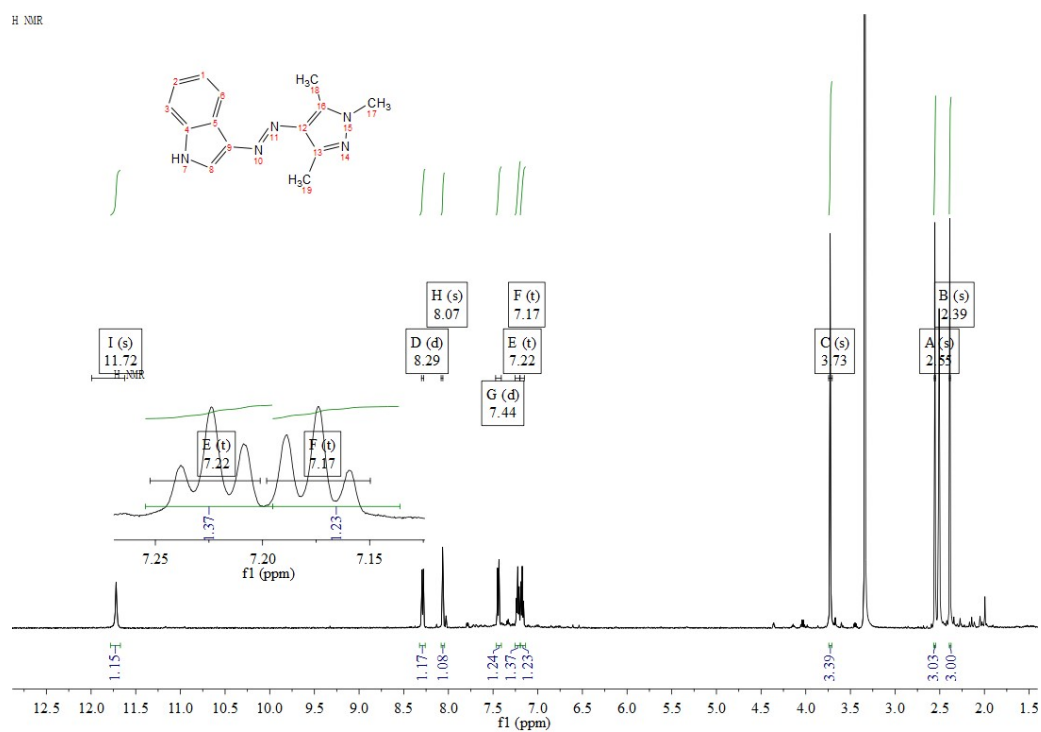

Figure S23.  $^1\text{H}$  NMR spectrum of **B1** in  $\text{DMSO}-d_6$ .

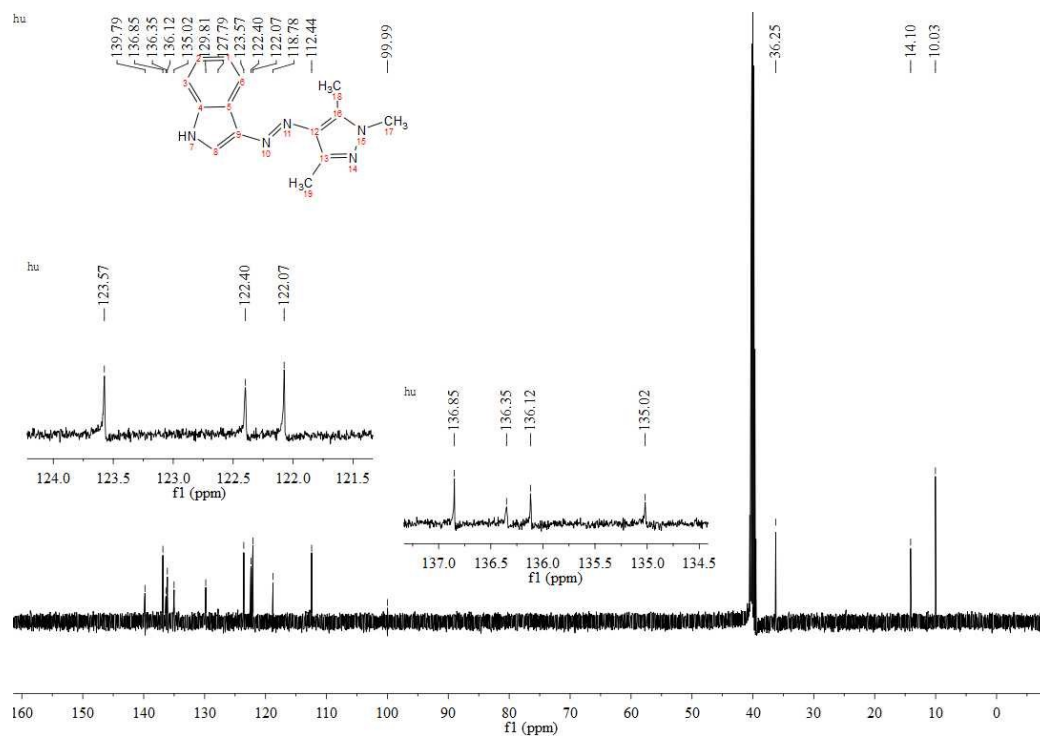

Figure S24.  $^{13}\text{C}$  NMR spectrum of **B1** in  $\text{DMSO-}d_6$ .

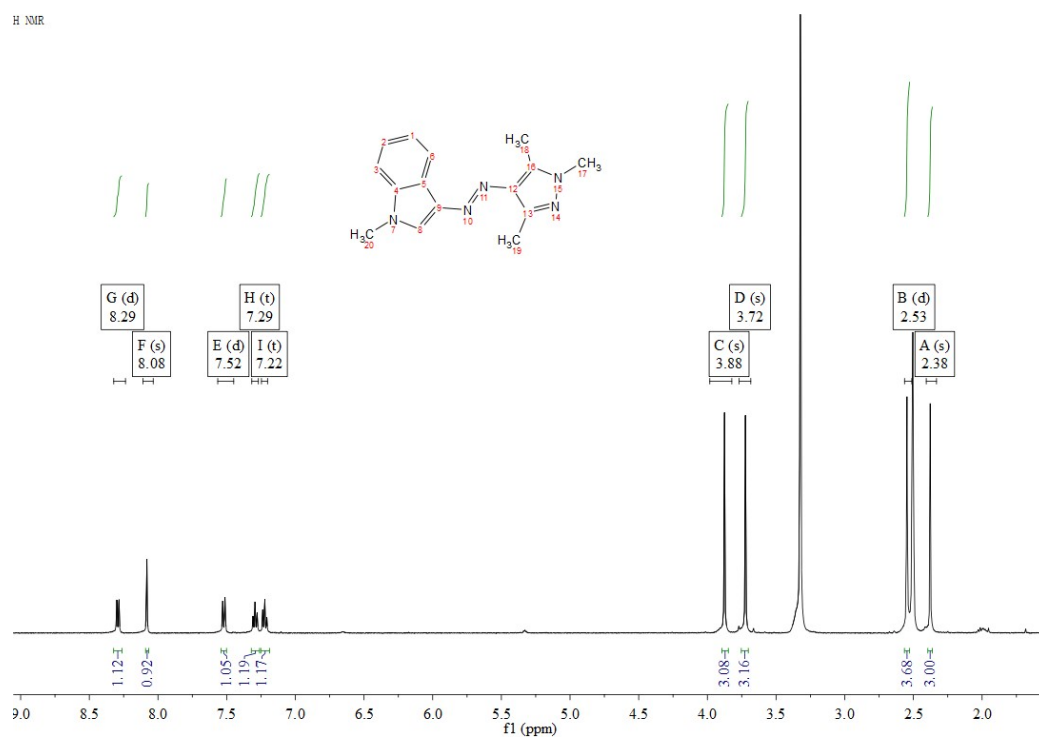

Figure S25.  $^1\text{H}$  NMR spectrum of **B2** in  $\text{DMSO-}d_6$ .



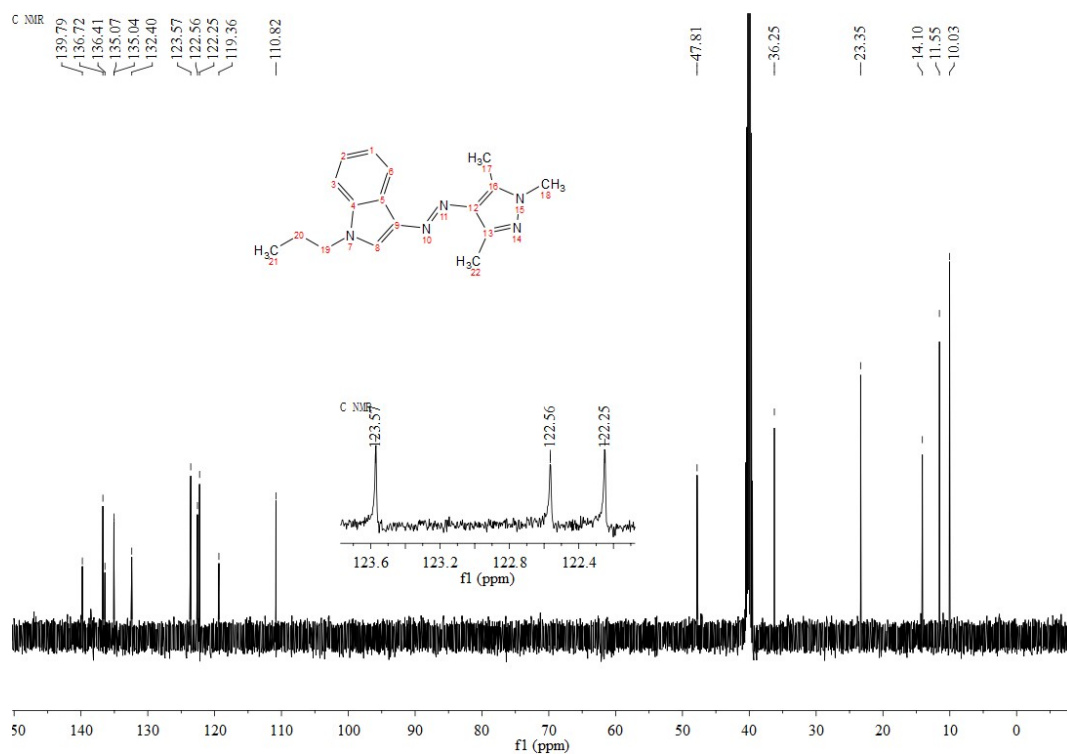

Figure S28. <sup>13</sup>C NMR spectrum of **B3** in DMSO-*d*<sub>6</sub>.

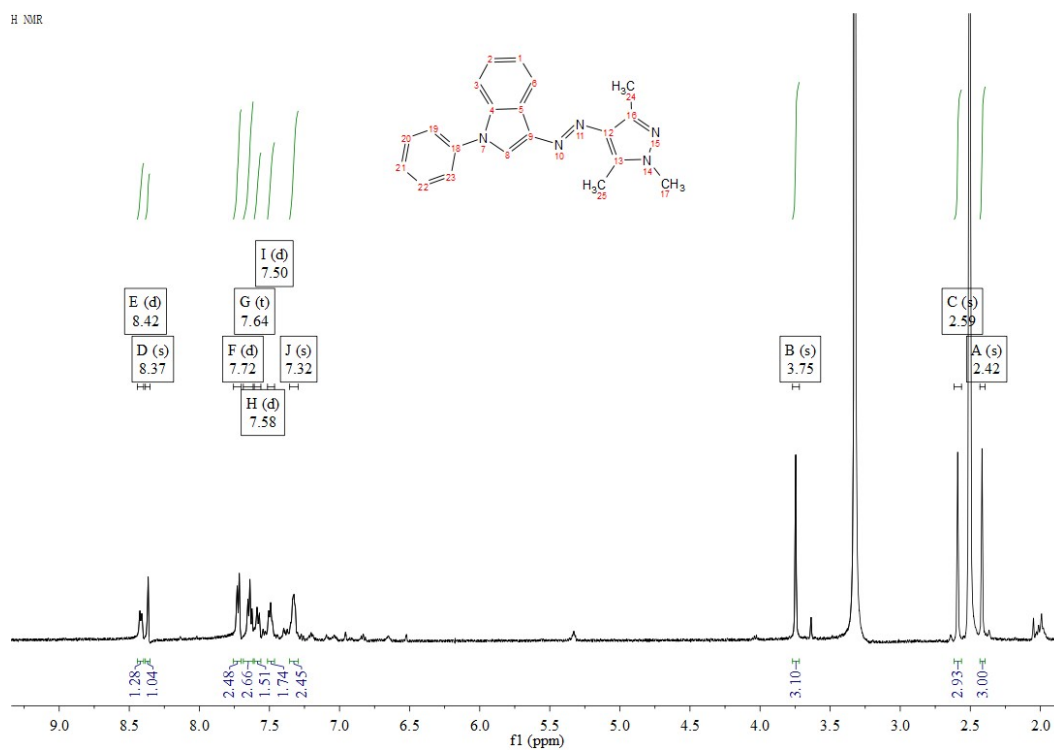

Figure S29. <sup>1</sup>H NMR spectrum of **B4** in DMSO-*d*<sub>6</sub>.



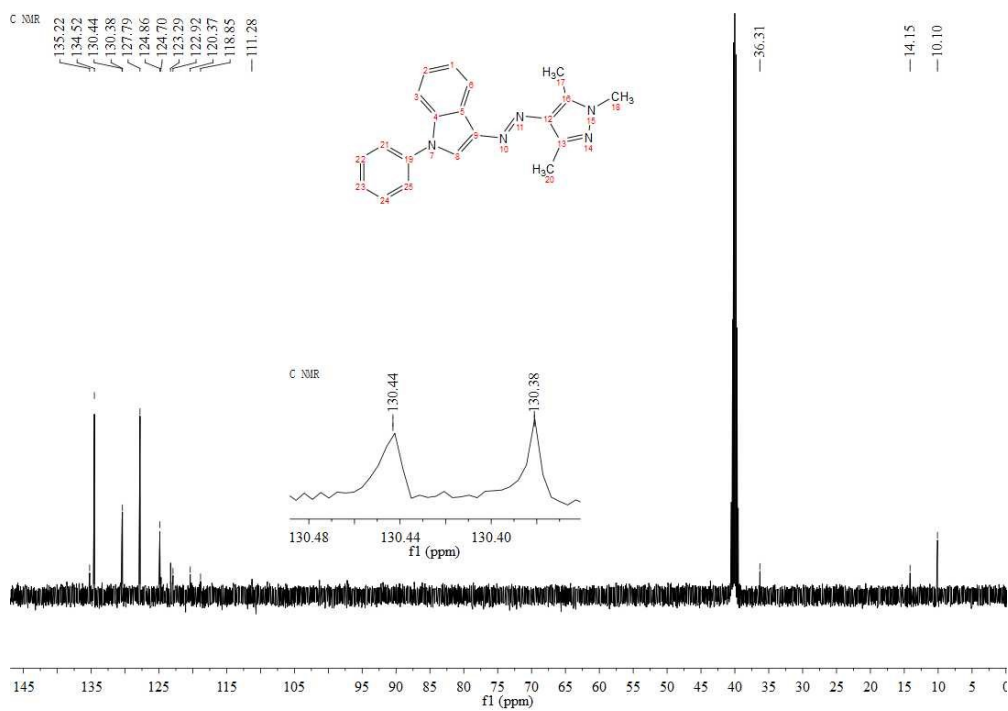

Figure S30. <sup>13</sup>C NMR spectrum of B4 in DMSO-*d*<sub>6</sub>.

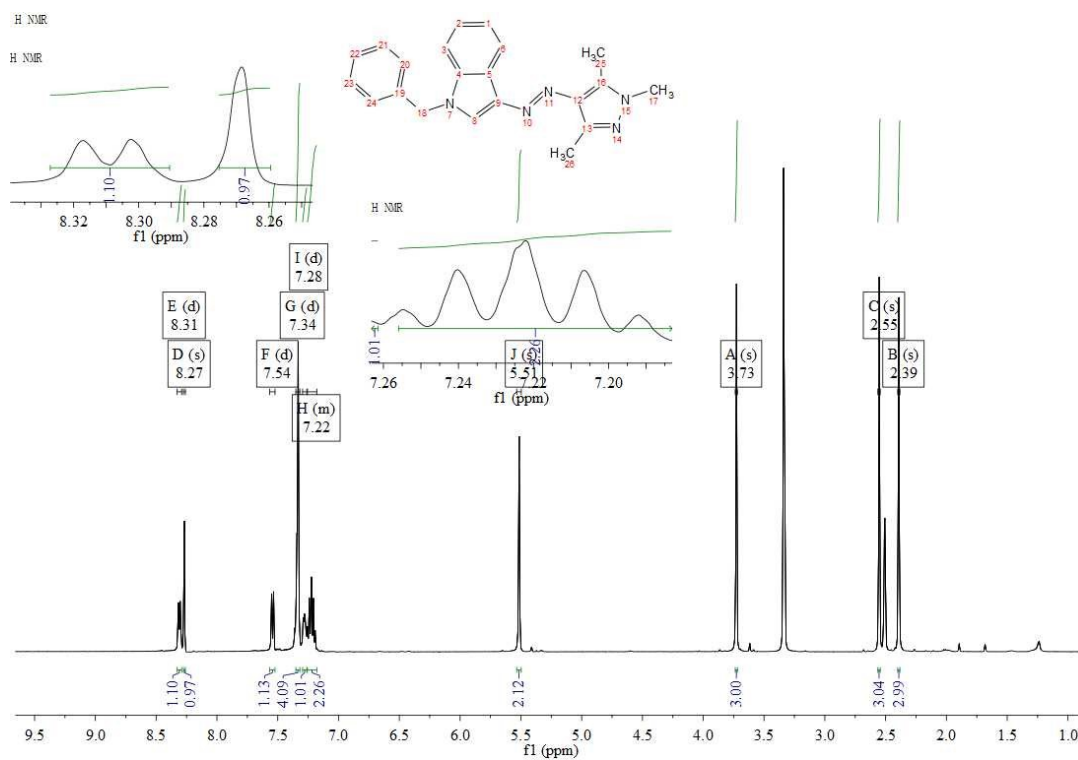

Figure S31. <sup>1</sup>H NMR spectrum of B5 in DMSO-*d*<sub>6</sub>.

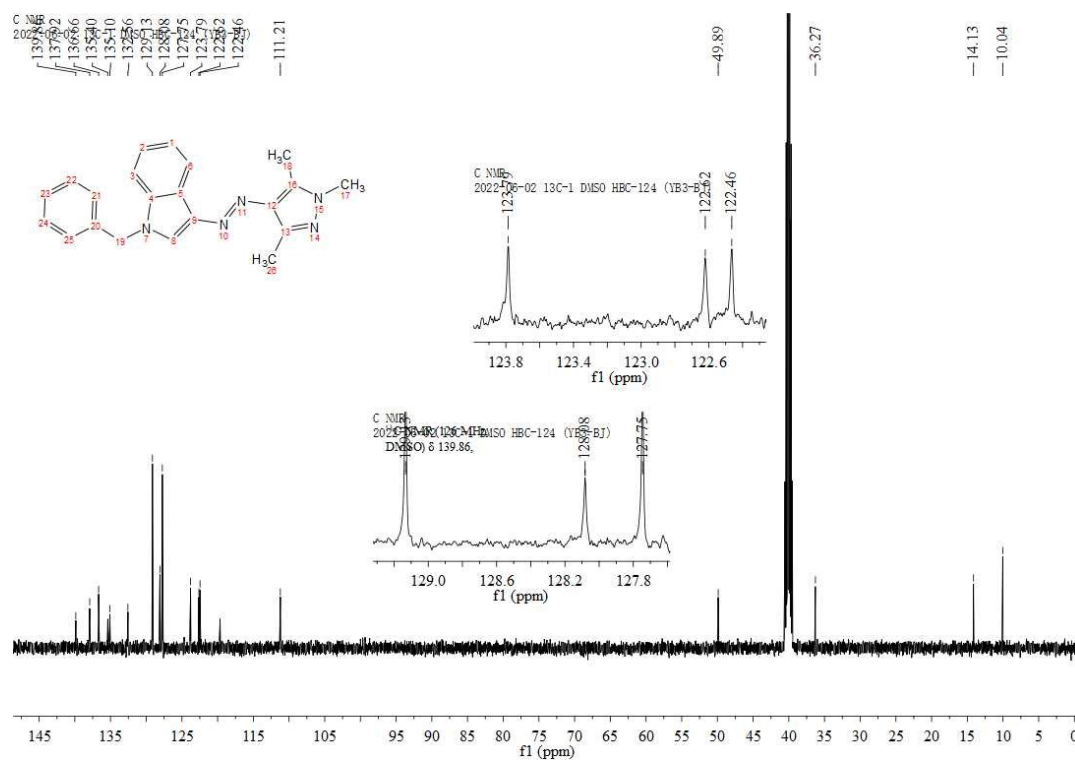

Figure S32.  $^{13}\text{C}$  NMR spectrum of **B5** in  $\text{DMSO-}d_6$ .

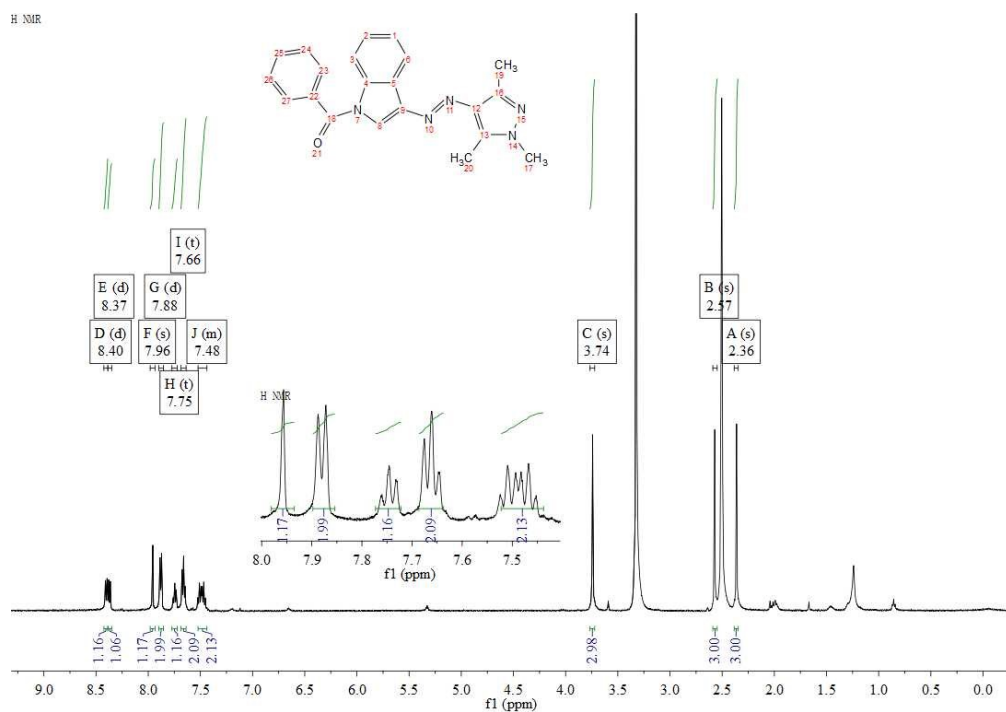

Figure S33.  $^1\text{H}$  NMR spectrum of **B6** in  $\text{DMSO-}d_6$ .

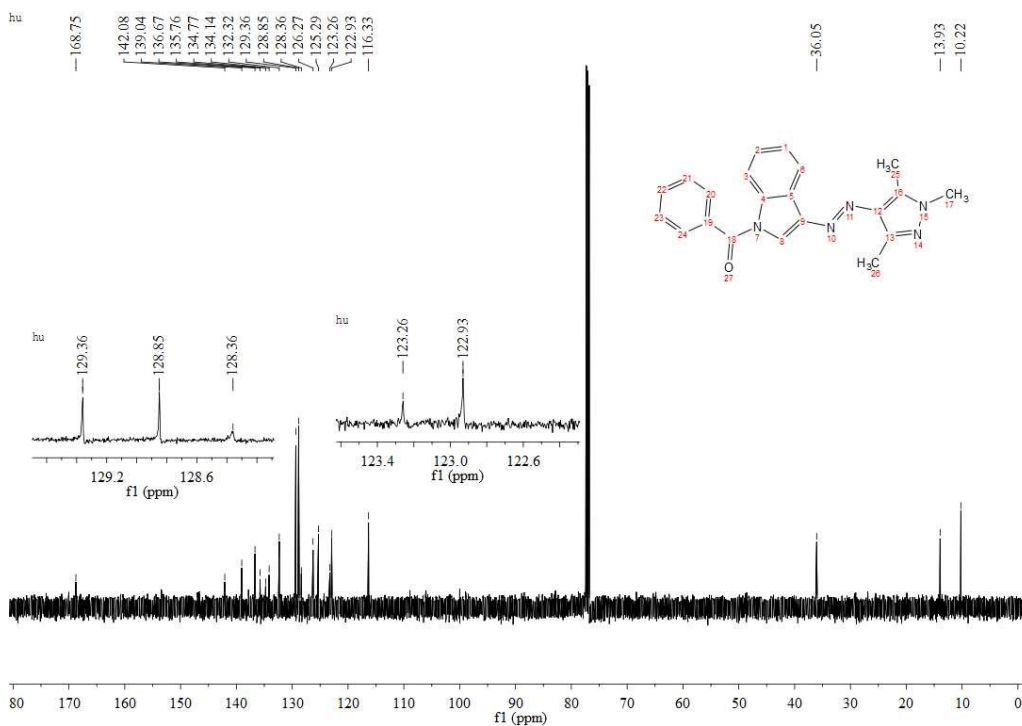

Figure S34. <sup>13</sup>C NMR spectrum of B6 in CDCl<sub>3</sub>.

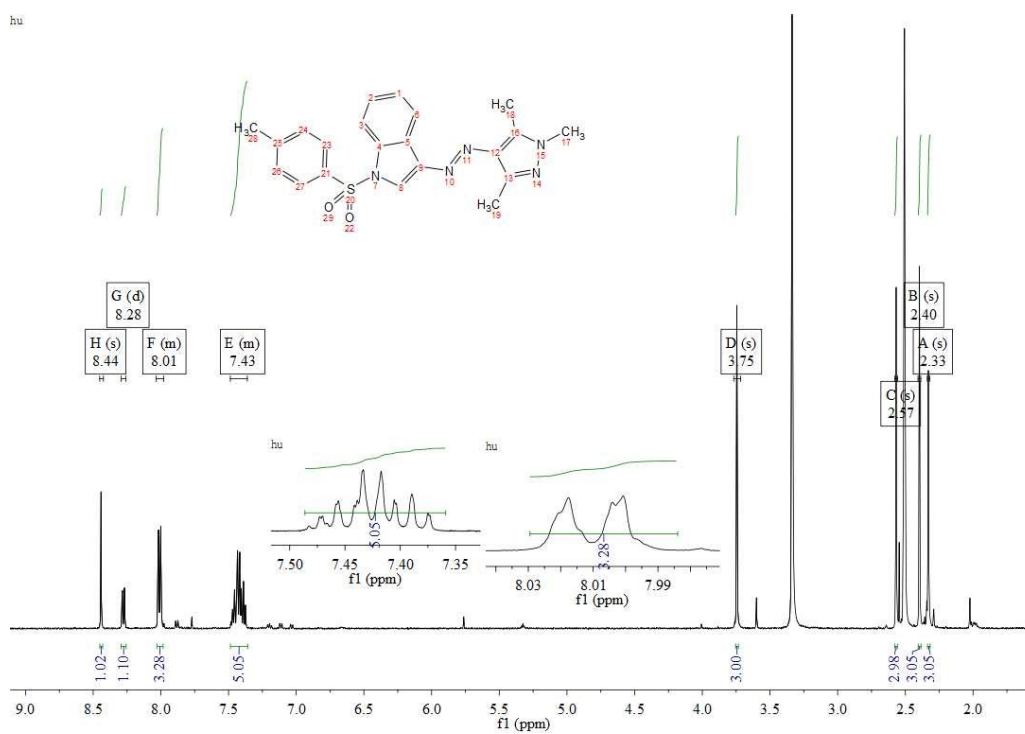

Figure S35. <sup>1</sup>H NMR spectrum of B7 in DMSO-*d*<sub>6</sub>.

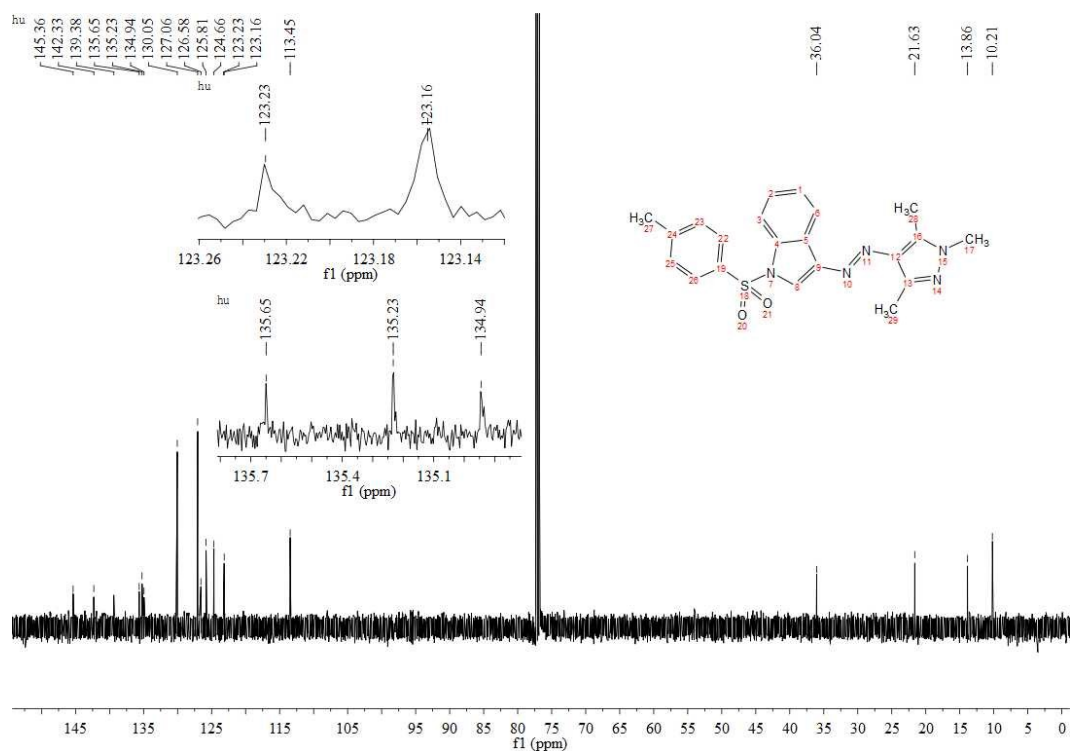

Figure S36.  $^{13}\text{C}$  NMR spectrum of **B7** in  $\text{CDCl}_3$ .

### 1.3. Crystal structure information

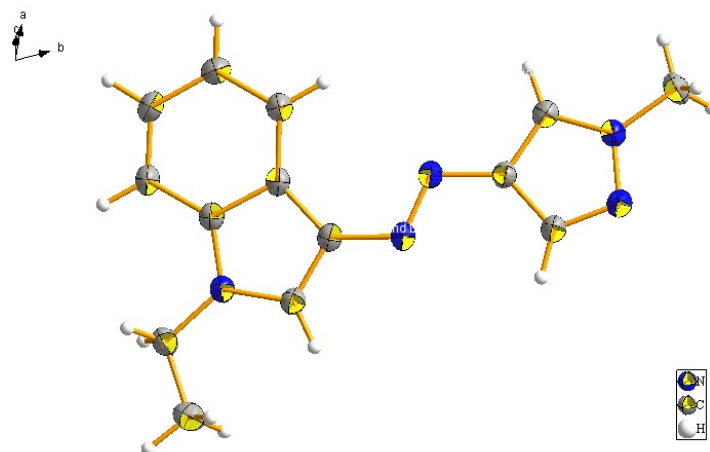

Figure S37. Molecular ellipsoid diagram of target compound (*E*)-**A3** (CCDC number: 2184785).

Table S1. Crystal structure information of compound **A3**

|                |                                        |
|----------------|----------------------------------------|
| Formula        | $\text{C}_{14}\text{H}_{15}\text{N}_5$ |
| Formula weight | 253.31                                 |
| Temperature/K  | 193.00                                 |
| Crystal system | triclinic                              |
|                | S24                                    |

|                                                    |                                                                  |
|----------------------------------------------------|------------------------------------------------------------------|
| Space group                                        | P-1                                                              |
| $a(\text{\AA})$                                    | 8.7299(5)                                                        |
| $b(\text{\AA})$                                    | 9.2355(5)                                                        |
| $c(\text{\AA})$                                    | 9.5254(5)                                                        |
| $\alpha(^{\circ})$                                 | 65.084(2)                                                        |
| $\beta(^{\circ})$                                  | 68.436(2)                                                        |
| $\gamma(^{\circ})$                                 | 73.691(2)                                                        |
| Volume( $\text{\AA}^3$ )                           | 640.49(6)                                                        |
| Z                                                  | 2                                                                |
| $\rho_{\text{calc}}(\text{g/cm}^3)$                | 1.313                                                            |
| $\mu(\text{mm}^{-1})$                              | 0.084                                                            |
| $F(000)$                                           | 268.0                                                            |
| Crystal size( $\text{mm}^3$ )                      | 0.16 × 0.15 × 0.13                                               |
| Radiation                                          | MoK $\alpha$ ( $\lambda = 0.71073$ )                             |
| 2 $\theta$ range for data collection( $^{\circ}$ ) | 4.918 to 54.976                                                  |
| Index ranges                                       | -11 ≤ h ≤ 11, -11 ≤ k ≤ 11, -12 ≤ l ≤ 12                         |
| Reflections collected                              | 20760                                                            |
| Independent reflections                            | 2926 [ $R_{\text{int}} = 0.0380$ , $R_{\text{sigma}} = 0.0229$ ] |
| Data/restraints/parameters                         | 2926/0/174                                                       |
| Goodness-of-fit on $F^2$                           | 1.100                                                            |
| Final R indexes [ $I \geq 2\sigma(I)$ ]            | $R_1 = 0.0401$ , $wR_2 = 0.1099$                                 |
| Final R indexes [all data]                         | $R_1 = 0.0436$ , $wR_2 = 0.1127$                                 |
| Largest diff. peak/hole ( e $\text{\AA}^{-3}$ )    | 0.26/-0.22                                                       |

---

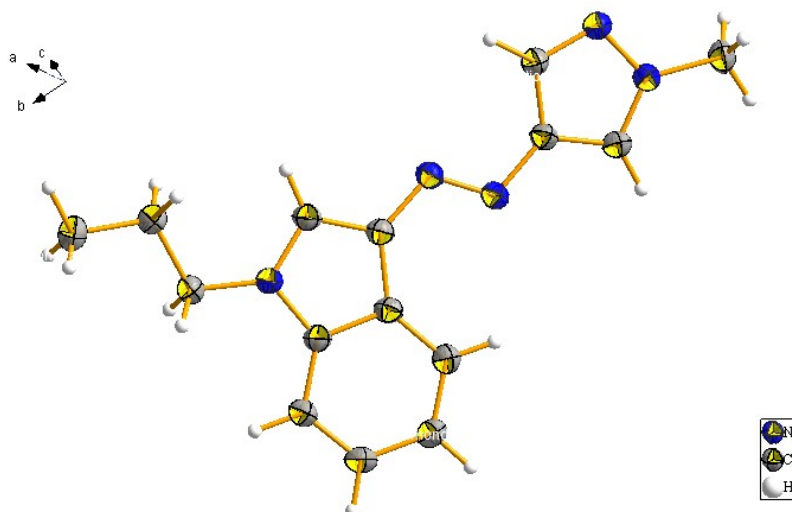

Figure S38. Molecular ellipsoid diagram of target compound (*E*)-**A4** (CCDC number: 2184786).

Table S2. Crystal structure information of compound **A4**

|                                           |                                                               |
|-------------------------------------------|---------------------------------------------------------------|
| Formula                                   | C <sub>15</sub> H <sub>17</sub> N <sub>5</sub>                |
| Formula weight                            | 267.33                                                        |
| Temperature/K                             | 193.00                                                        |
| Crystal system                            | triclinic                                                     |
| Space group                               | P-1                                                           |
| <i>a</i> (Å)                              | 9.2845(5)                                                     |
| <i>b</i> (Å)                              | 9.2942(5)                                                     |
| <i>c</i> (Å)                              | 9.4489(4)                                                     |
| $\alpha$ (°)                              | 67.465(2)                                                     |
| $\beta$ (°)                               | 69.500(2)                                                     |
| $\gamma$ (°)                              | 70.108(2)                                                     |
| Volume(Å <sup>3</sup> )                   | 685.12(6)                                                     |
| <i>Z</i>                                  | 2                                                             |
| $\rho_{\text{calc}}$ (g/cm <sup>3</sup> ) | 1.296                                                         |
| $\mu$ (mm <sup>-1</sup> )                 | 0.082                                                         |
| <i>F</i> (000)                            | 284.0                                                         |
| Crystal size(mm <sup>3</sup> )            | 0.2 × 0.18 × 0.15                                             |
| Radiation                                 | MoK $\alpha$ ( $\lambda$ = 0.71073)                           |
| 2 $\theta$ range for data collection(°)   | 4.822 to 54.972                                               |
| Index ranges                              | -12 ≤ <i>h</i> ≤ 12, -12 ≤ <i>k</i> ≤ 12, -12 ≤ <i>l</i> ≤ 12 |
| Reflections collected                     | 22511                                                         |

|                                                  |                                                                  |
|--------------------------------------------------|------------------------------------------------------------------|
| Independent reflections                          | 3127 [ $R_{\text{int}} = 0.0419$ , $R_{\text{sigma}} = 0.0279$ ] |
| Data/restraints/parameters                       | 3127/0/183                                                       |
| Goodness-of-fit on $F^2$                         | 1.059                                                            |
| Final $R$ indexes [ $I >= 2\sigma(I)$ ]          | $R_1 = 0.0404$ , $wR_2 = 0.1083$                                 |
| Final $R$ indexes [all data]                     | $R_1 = 0.0438$ , $wR_2 = 0.1112$                                 |
| Largest diff. peak/hole ( $e \text{ \AA}^{-3}$ ) | 0.26/-0.22                                                       |

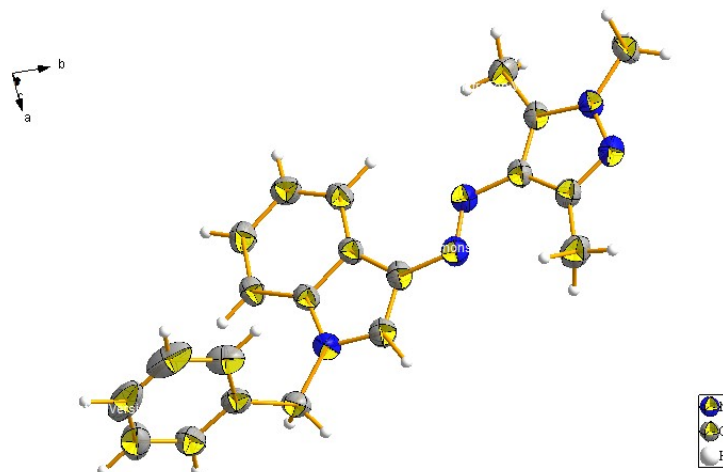

Figure S39. Molecular ellipsoid diagram of target compound (*E*)-**B5** (CCDC number: 2184787).

Table S3. Crystal structure information of compound **B5**

|                                     |                   |
|-------------------------------------|-------------------|
| Formula                             | $C_{21}H_{21}N_5$ |
| Formula weight                      | 343.43            |
| Temperature/K                       | 193.00            |
| Crystal system                      | triclinic         |
| Space group                         | P-1               |
| $a(\text{\AA})$                     | 5.4109(4)         |
| $b(\text{\AA})$                     | 12.3109(6)        |
| $c(\text{\AA})$                     | 14.8982(9)        |
| $\alpha(^{\circ})$                  | 67.826(2)         |
| $\beta(^{\circ})$                   | 83.410(2)         |
| $\gamma(^{\circ})$                  | 88.031(2)         |
| Volume( $\text{\AA}^3$ )            | 912.90(10)        |
| $Z$                                 | 2                 |
| $\rho_{\text{calc}}(\text{g/cm}^3)$ | 1.249             |

|                                                  |                                                               |
|--------------------------------------------------|---------------------------------------------------------------|
| $\mu(\text{mm}^{-1})$                            | 0.077                                                         |
| $F(000)$                                         | 364.0                                                         |
| Crystal size( $\text{mm}^3$ )                    | $0.16 \times 0.15 \times 0.12$                                |
| Radiation                                        | MoK $\alpha$ ( $\lambda = 0.71073$ )                          |
| $2\theta$ range for data collection( $^\circ$ )  | 5.438 to 54.902                                               |
| Index ranges                                     | $-7 \leq h \leq 7, -15 \leq k \leq 14, -19 \leq l \leq 19$    |
| Reflections collected                            | 18968                                                         |
| Independent reflections                          | 4149 [ $R_{\text{int}} = 0.0703, R_{\text{sigma}} = 0.0510$ ] |
| Data/restraints/parameters                       | 4149/0/319                                                    |
| Goodness-of-fit on $F^2$                         | 1.033                                                         |
| Final $R$ indexes [ $I > 2\sigma(I)$ ]           | $R_1 = 0.0533, wR_2 = 0.1216$                                 |
| Final $R$ indexes [all data]                     | $R_1 = 0.0903, wR_2 = 0.1498$                                 |
| Largest diff. peak/hole ( $e \text{ \AA}^{-3}$ ) | 0.29/-0.18                                                    |

## 2 Photochemical research

### General information

The light sources used for photoisomerization are: 365 nm LED lamp (3 W), 460 nm LED lamp (5 W), 254 nm lamp (3 W), 302 nm LED lamp (3 W), 515 nm laser (80 mW), 650 nm laser (200 mW).

### Photochemical isomerizations (PSSs)

PSS compositions at different wavelengths were determined as follows: 365 and 460 nm PSSs were determined by  $^1\text{H}$  NMR in DMSO. The sample (1-2 mg/mL in DMSO- $d_6$ ) was sealed in a quartz cuvette and then irradiated with 365 nm or 460 nm LED light typically for 30-40 min to ensure the establishment of PSS. Then we used the UV-Vis spectra of a trans isomer and a 365 nm PSS state to deduce the spectrum of the cis isomer. A pair of trans and cis spectra were used for fitting the respective spectra at 254, 302, 515, and 650 nm PSS states. According to the fitting results, isomer fractions in the respective PSS states were obtained.

Spectral fitting follows the equation:  $\alpha \times \text{Abs}_{\text{trans}}(\lambda) + (1-\alpha) \times \text{Abs}_{\text{cis}}(\lambda) = \text{Abs}_{\text{pss}}(\lambda)$ .

With  $\alpha$  the content of trans isomer in a PSS state,  $\text{Abs}_{\text{trans}}(\lambda)$ ,  $\text{Abs}_{\text{cis}}(\lambda)$  and  $\text{Abs}_{\text{pss}}(\lambda)$  the spectra of pure trans, pure cis and pss state (at the same concentration).

### Optical cycle

To check the photostability, solutions of the synthesized switches in DMSO were exposed to 365 nm and 460 nm light alternately. After 8-10 times cycles of photolysis, noticeable photobleaching was not found for any of these switches.

### Thermal isomerization kinetics<sup>s1</sup>



Thermal cis-trans isomerization kinetics was studied at elevated temperatures. The trans sample was thermally equilibrated for at least 10 min to reach the equilibrium temperature, and the absorbance at  $\pi-\pi^*$   $\lambda_{\text{max}}$  was recorded. It was then irradiated for 10 s by 365 nm UV light to reach a cis-rich state and thermally equilibrated again for 2 min. The absorbance was read at a certain interval (typically, 60 s) with a sampling time of 1 s.

The absorbance data were fitted following first-order rate equation:

$$\ln [(A_{\infty}-A_0)/(A_{\infty}-A_t)] = kt$$

$A_{\infty}$ ,  $A_0$  and  $A_t$  represent the absorbances of pure trans state, at initial state ( $\text{PSS}_{\text{cis}}$ ) and at reaction time  $t$ .

The thermal half-life  $t_{1/2}$  of a first-order kinetics reaction was calculated as:

$$t_{1/2} = \ln 2/k$$

The Arrhenius equation can be used to analyse the relationship between  $k$  and reaction temperature  $T$ :

$$\ln k = (-E_a/RT) \ln A$$

$E_a$  is the apparent activation energy,  $R$  is the gas constant and  $A$  is the pre-exponential factor.

## 2.1 UV/Vis spectra for the manuscript text.

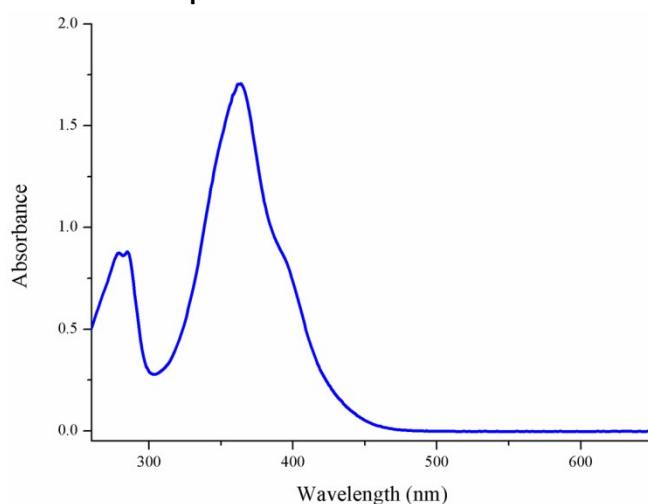

Fig. S40. UV/Vis spectrum at ambient light of compound **A1** in DMSO at room temperature (0.1 mM).

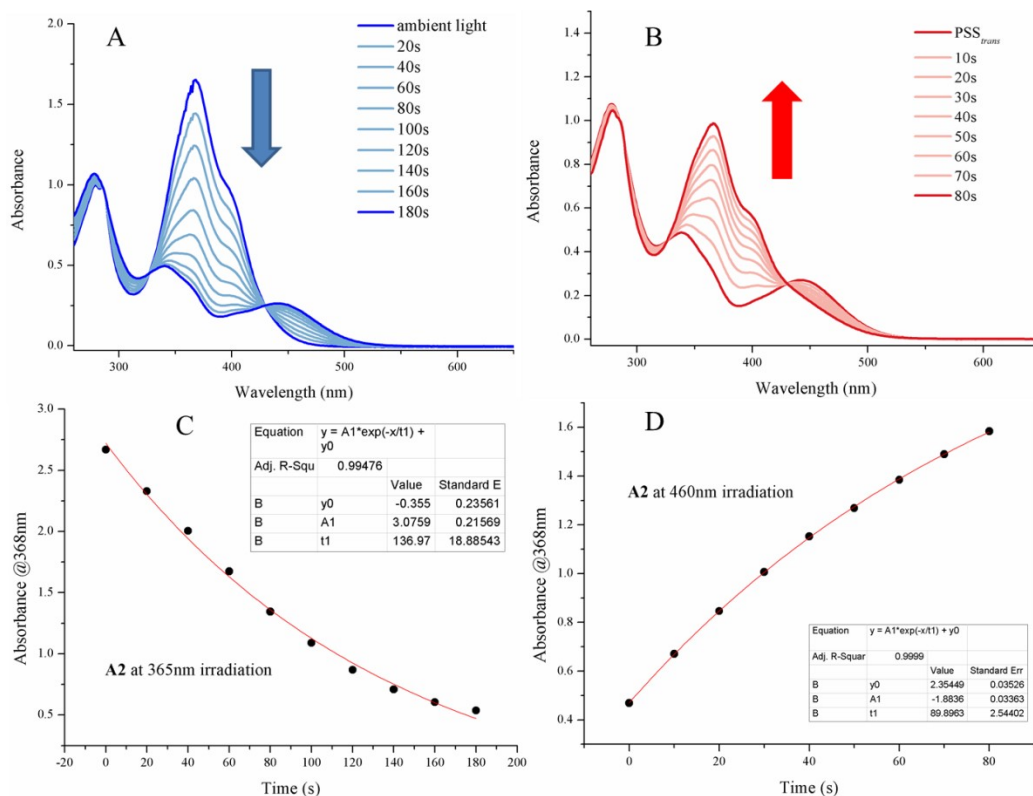

Fig. S41. UV/Vis spectral changes during (A) UV (365 nm) and (B) visible light (460 nm) irradiation of compound **A2** in DMSO at room temperature. Kinetics of the photoisomerization for compound **A2** at (C) 365 nm irradiation and at (D) 460 nm irradiation (0.108 mM).

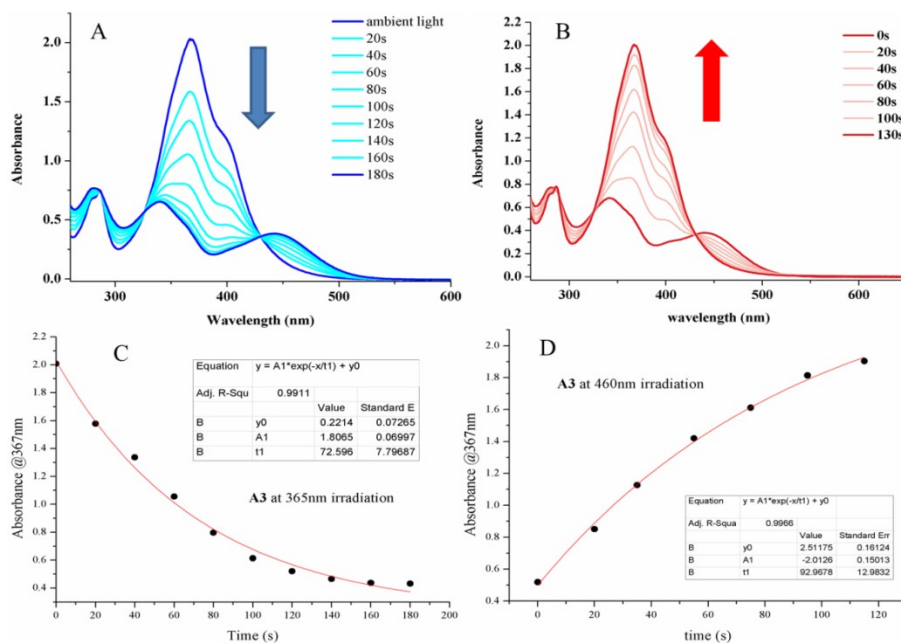

Fig. S42. UV/Vis spectral changes during (A) UV (365 nm) and (B) visible light (460 nm) irradiation of compound **A3** in DMSO at room temperature. Kinetics of the photoisomerization for compound **A3** at (C) 365 nm irradiation and at (D) 460 nm irradiation (0.098 mM).

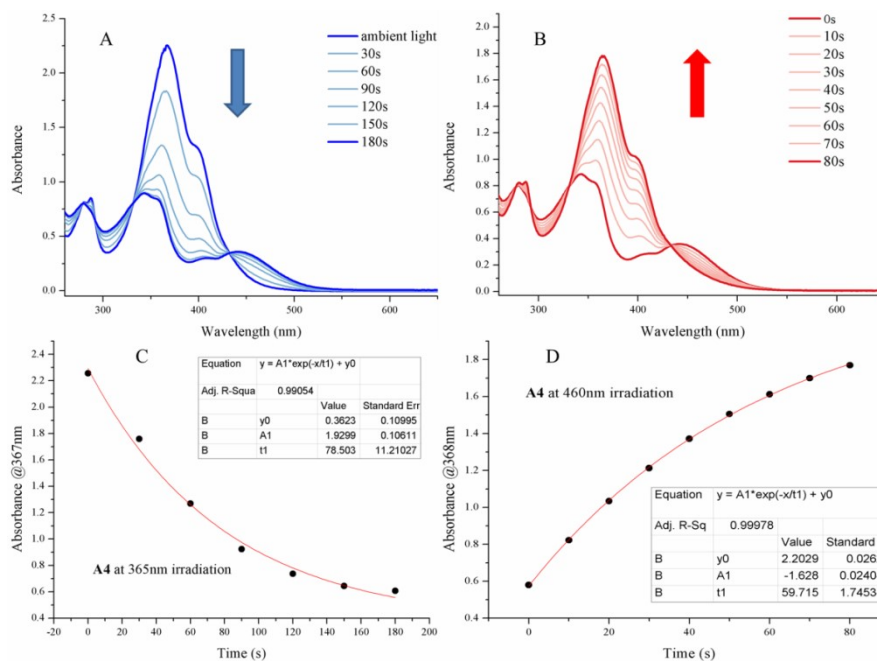

Fig. S43. UV/Vis spectral changes during (A) UV (365 nm) and (B) visible light (460 nm) irradiation of compound **A4** in DMSO at room temperature. Kinetics of the photoisomerization for compound **A4** at (C) 365 nm irradiation and at (D) 460 nm irradiation (0.100 mM).

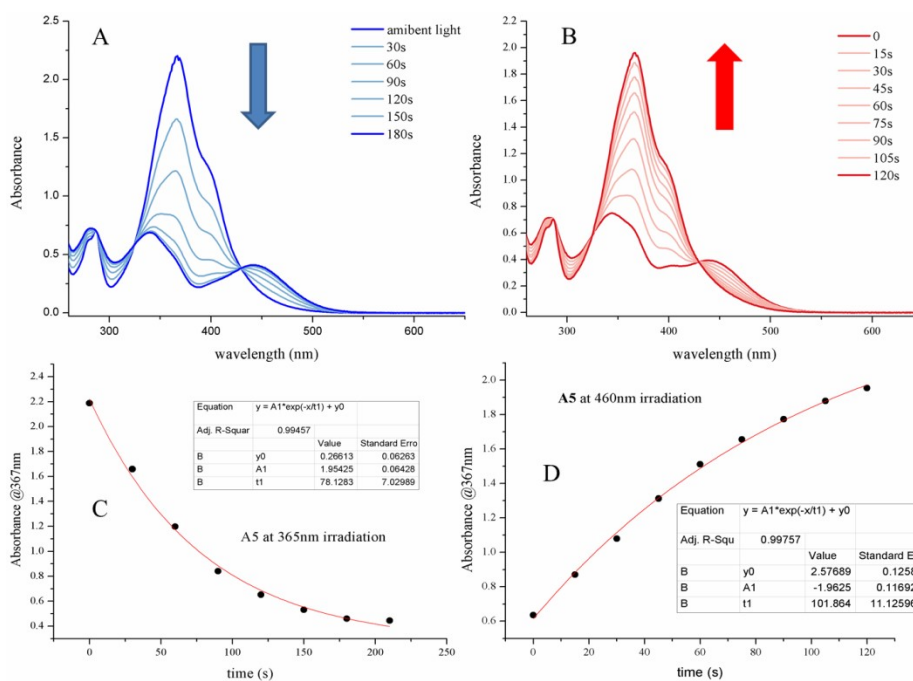

Fig. S44. UV/Vis spectral changes during (A) UV (365 nm) and (B) visible light (460 nm) irradiation of compound **A5** in DMSO at room temperature. Kinetics of the photoisomerization for compound **A5** at (C) 365 nm irradiation and at (D) 460 nm irradiation (0.100 mM).

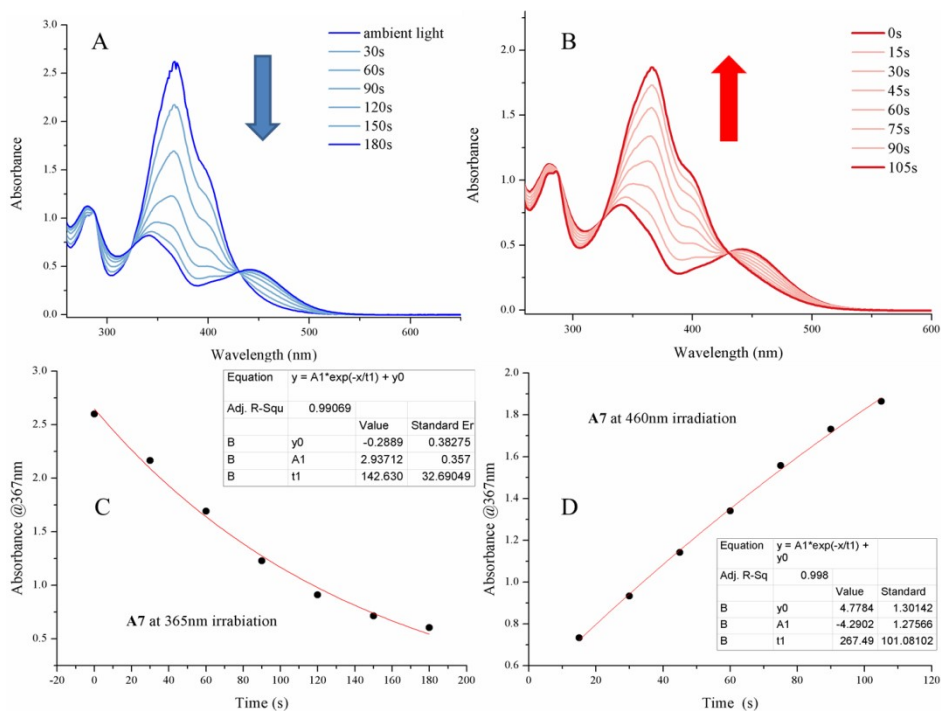

Fig. S45. UV/Vis spectral changes during (A) UV (365 nm) and (B) visible light (460 nm) irradiation of compound **A7** in DMSO at room temperature. Kinetics of the photoisomerization for compound **A7** at (C) 365 nm irradiation and at (D) 460 nm irradiation (0.100 mM).

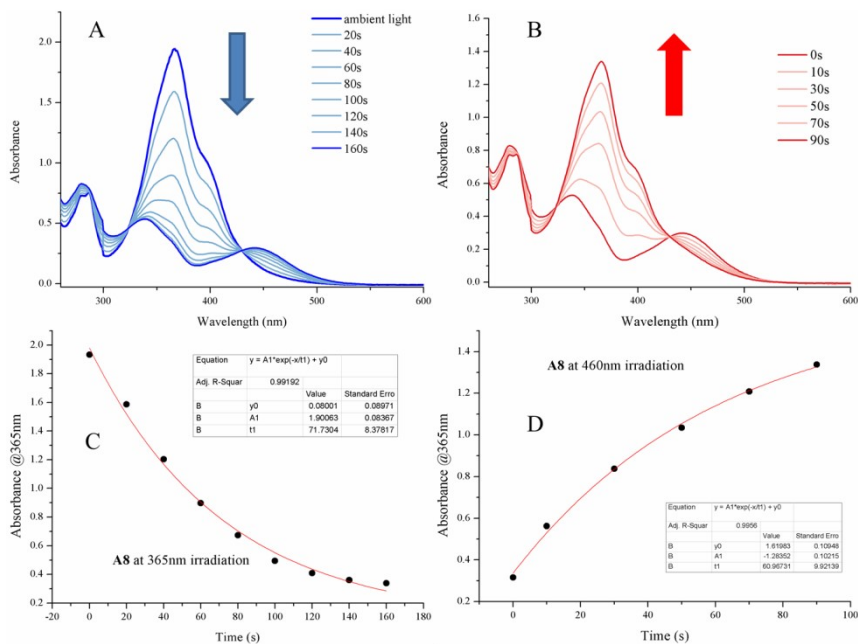

Fig. S46. UV/Vis spectral changes during (A) UV (365 nm) and (B) visible light (460 nm) irradiation of compound **A8** in DMSO at room temperature. Kinetics of the photoisomerization for compound **A8** at (C) 365 nm irradiation and at (D) 460 nm irradiation (0.095 mM).

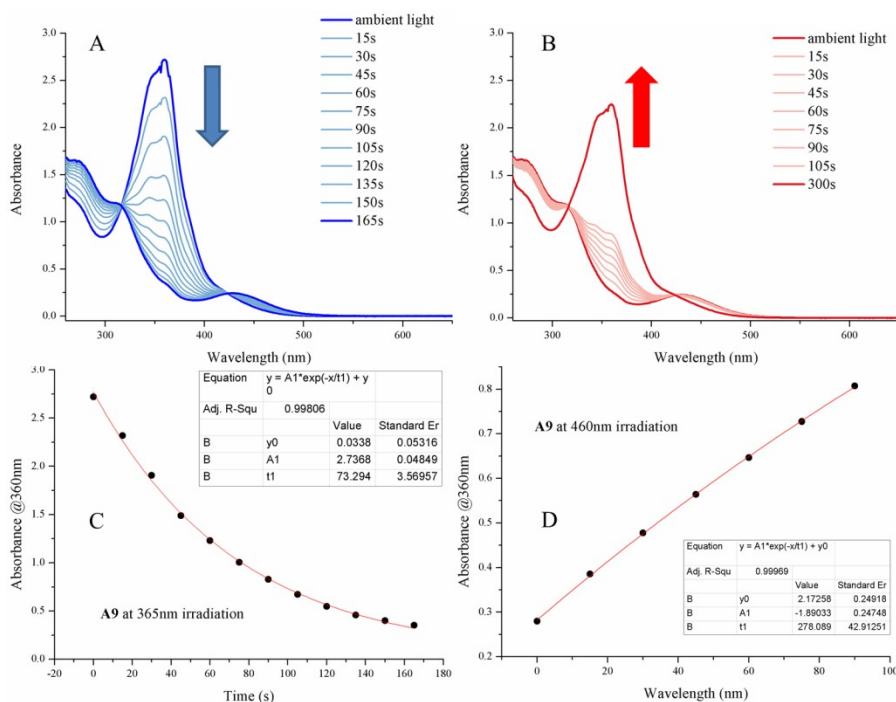

Fig. S47. UV/Vis spectral changes during (A) UV (365 nm) and (B) visible light (460 nm) irradiation of compound **A9** in DMSO at room temperature. Kinetics of the photoisomerization for compound **A9** at (C) 365 nm irradiation and at (D) 460 nm irradiation (0.097 mM).

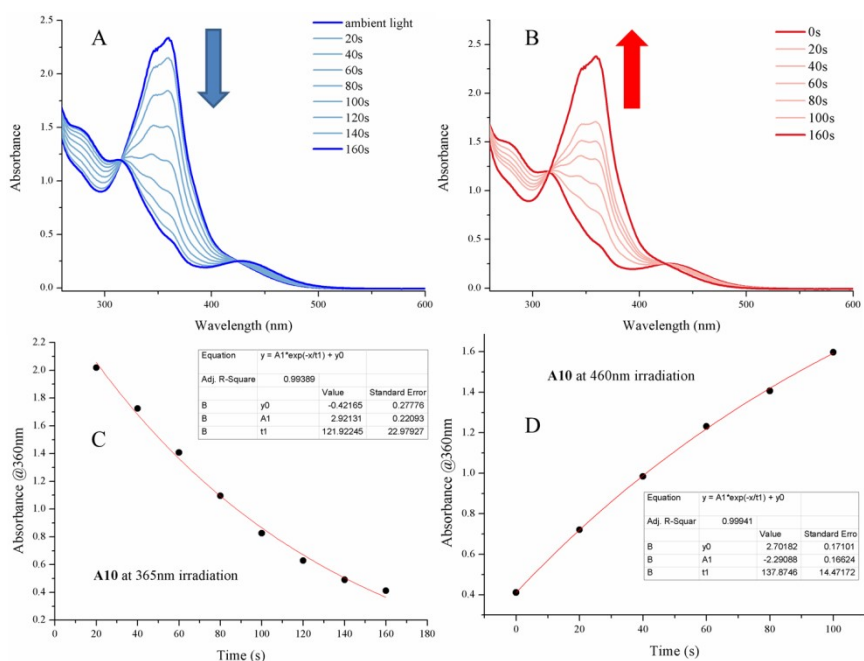

Fig. S48. UV/Vis spectral changes during (A) UV (365 nm) and (B) visible light (460 nm) irradiation of compound **A10** in DMSO at room temperature. Kinetics of the photoisomerization for compound **A10** at (C) 365 nm irradiation and at (D) 460 nm irradiation (0.1 mM).

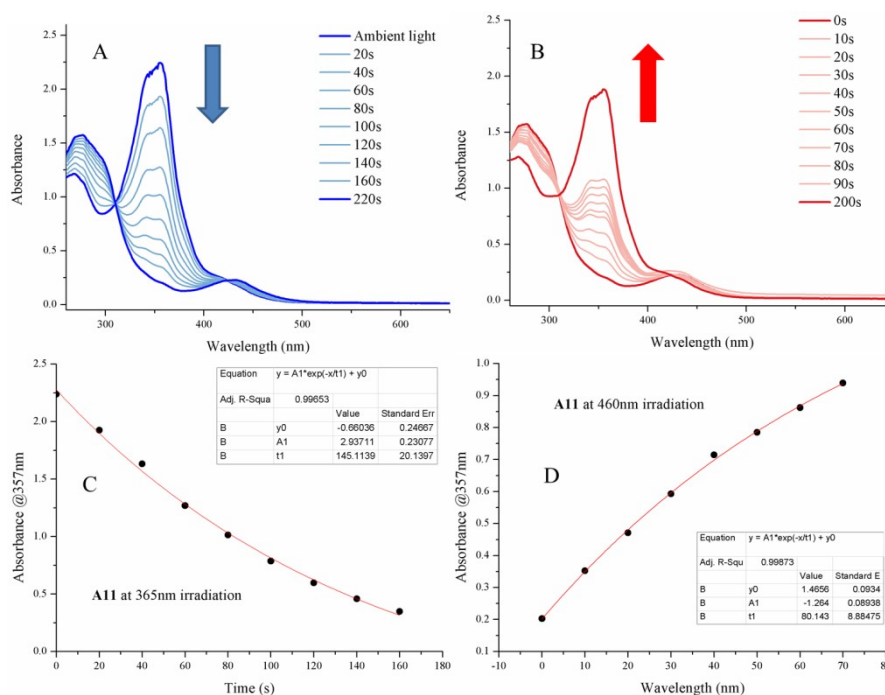

Fig. S49. UV/Vis spectral changes during (A) UV (365 nm) and (B) visible light (460 nm) irradiation of compound **A11** in DMSO at room temperature. Kinetics of the photoisomerization for compound **A11** at (C) 365 nm irradiation and at (D) 460 nm irradiation (0.1 mM).

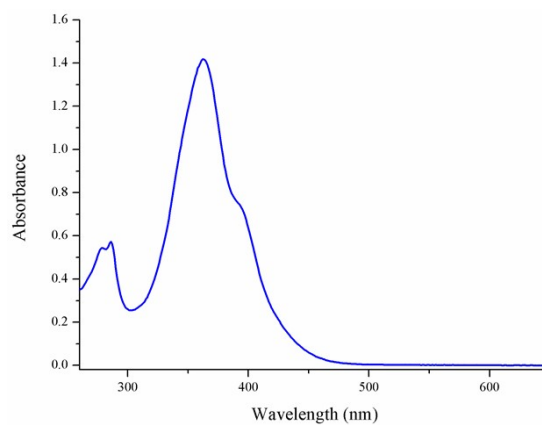

Fig. S50. UV/Vis spectra at ambient light of compound **B1** in DMSO at room temperature (0.1 mM).



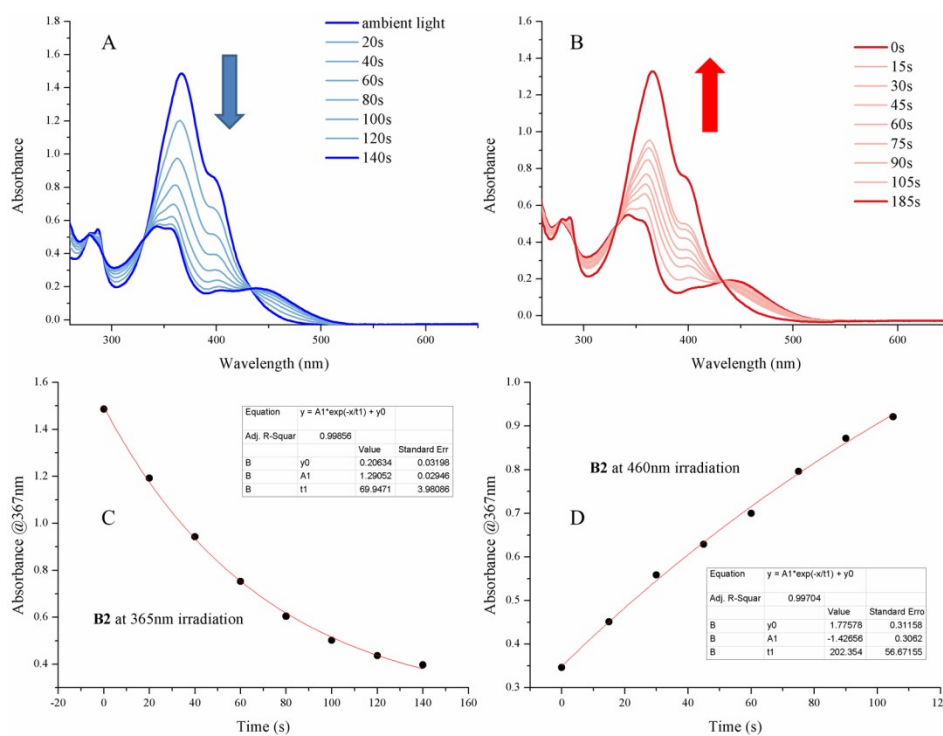

Fig. S51. UV/Vis spectral changes during (A) UV (365 nm) and (B) visible light (460 nm) irradiation of compound **B2** in DMSO at room temperature. Kinetics of the photoisomerization for compound **B2** at (C) 365 nm irradiation and at (D) 460 nm irradiation (0.1 mM).

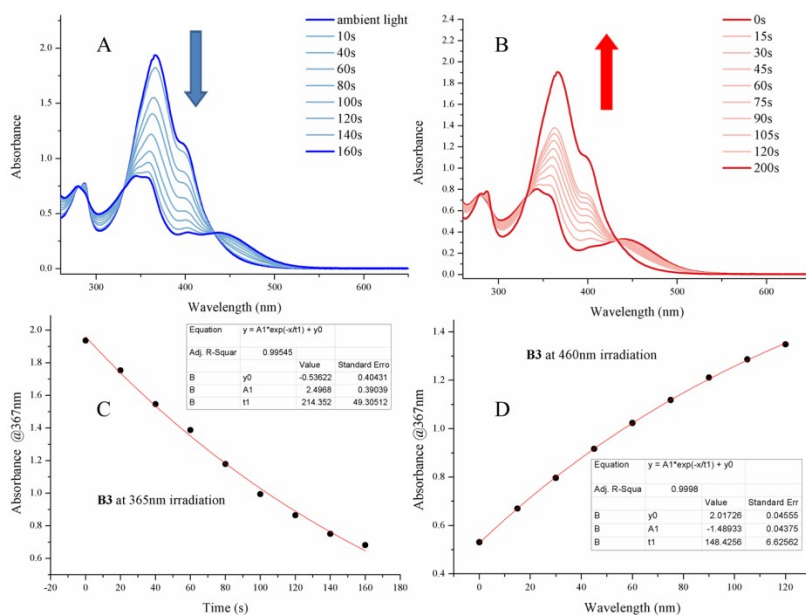

Fig. S52. UV/Vis spectral changes during (A) UV (365 nm) and (B) visible light (460 nm) irradiation of compound **B3** in DMSO at room temperature. Kinetics of the photoisomerization for compound **B3** at (C) 365 nm irradiation and at (D) 460 nm irradiation (0.1 mM).

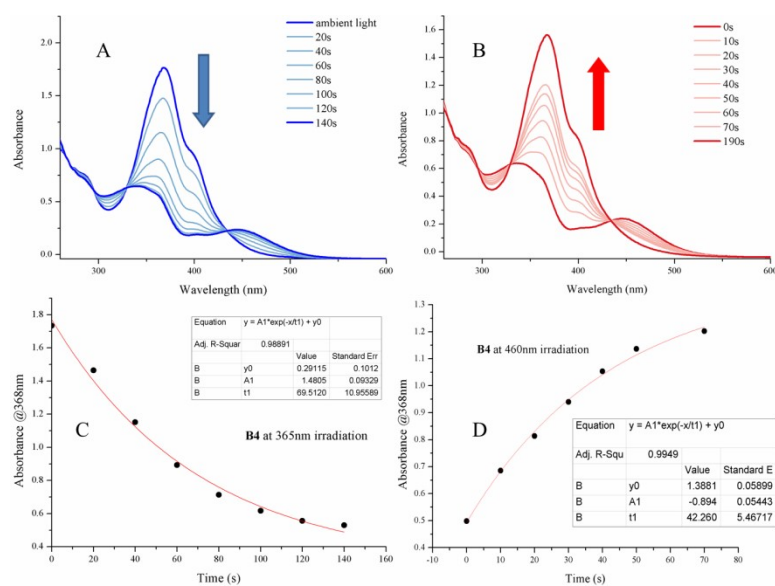

Fig. S53. UV/Vis spectral changes during (A) UV (365 nm) and (B) visible light (460 nm) irradiation of compound **B4** in DMSO at room temperature. Kinetics of the photoisomerization for compound **B4** at (C) 365 nm irradiation and at (D) 460 nm irradiation (0.1 mM).

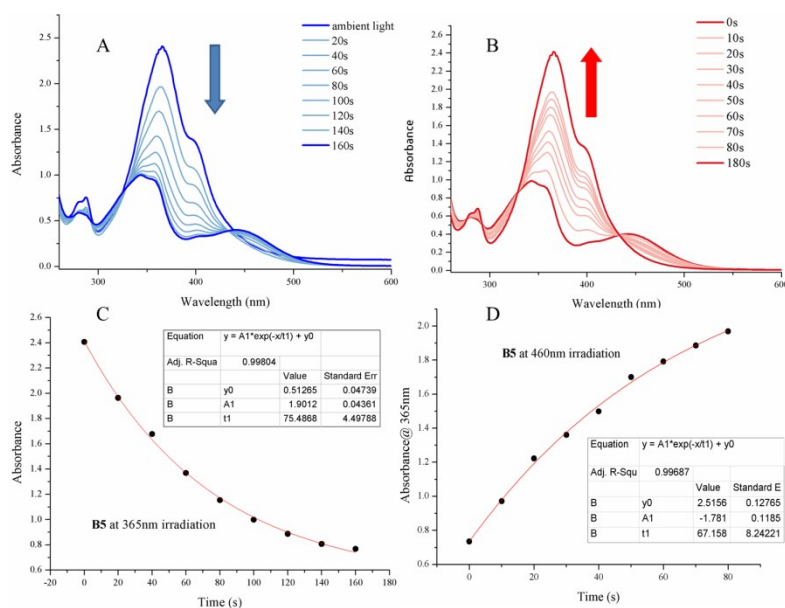

Fig. S54. UV/Vis spectral changes during (A) UV (365 nm) and (B) visible light (460 nm) irradiation of compound **B5** in DMSO at room temperature. Kinetics of the photoisomerization for compound **B5** at (C) 365 nm irradiation and at (D) 460 nm irradiation (0.1 mM).



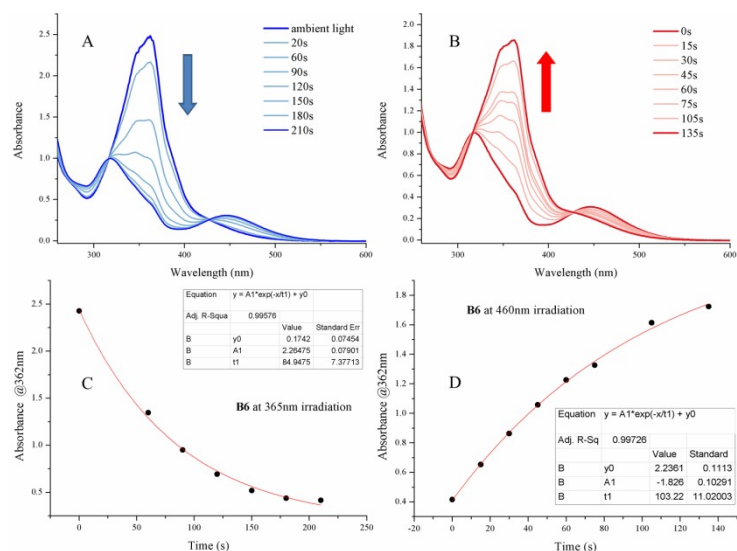

Fig. S55. UV/Vis spectral changes during (A) UV (365 nm) and (B) visible light (460 nm) irradiation of compound **B6** in DMSO at room temperature. Kinetics of the photoisomerization for compound **B6** at (C) 365 nm irradiation and at (D) 460 nm irradiation (0.1 mM).

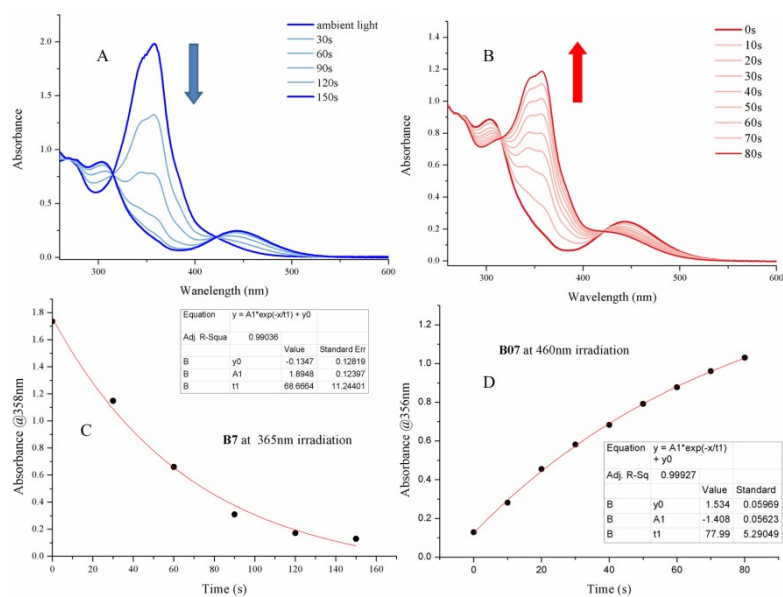

Fig. S56. UV/Vis spectral changes during (A) UV (365 nm) and (B) visible light (460 nm) irradiation of compound **B7** in DMSO at room temperature. Kinetics of the photoisomerization for compound **B7** at (C) 365 nm irradiation and at (D) 460 nm irradiation (0.1 mM).

## 2.2

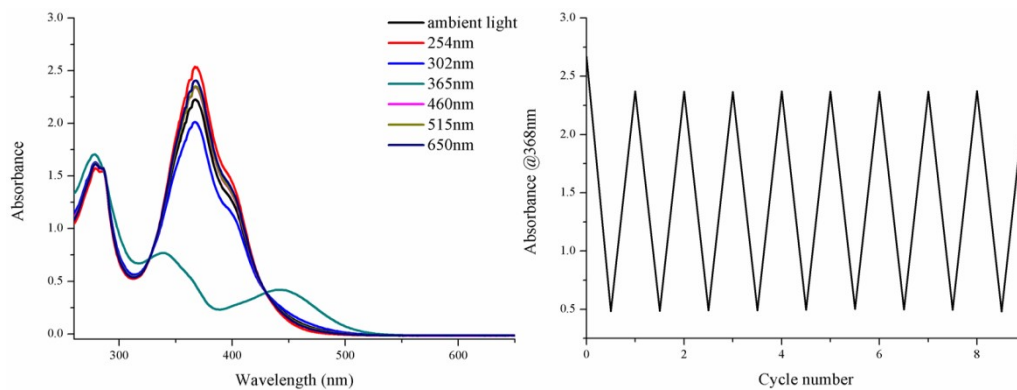

Fig. S57. UV/Vis absorption spectra of **A3** in PSSs generated by irradiations with various wavelengths of light in DMSO (left). Multiple rounds of photoswitching of **A3** by alternating 365 nm and 460 nm light irradiations in DMSO (right).

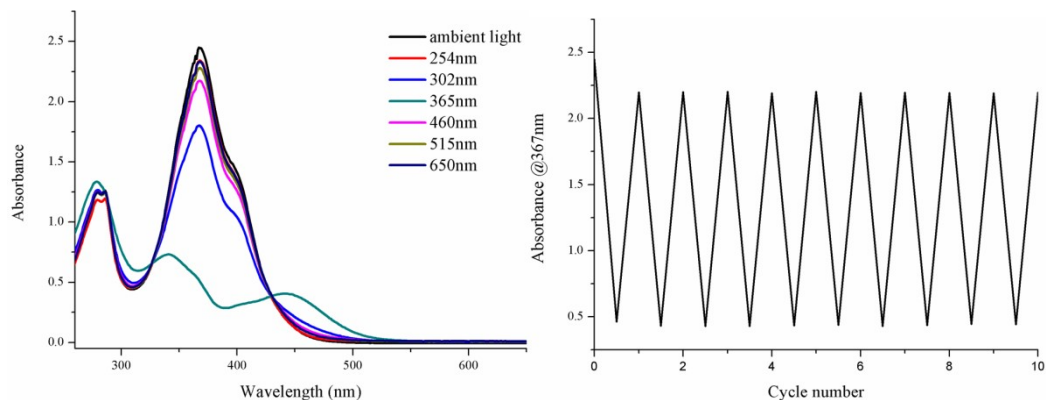

Fig. S58. UV/Vis absorption spectra of **A2** in PSSs generated by irradiations with various wavelengths of light in DMSO (left). Multiple rounds of photoswitching of **A2** by alternating 365 nm and 460 nm light irradiations in DMSO (right).

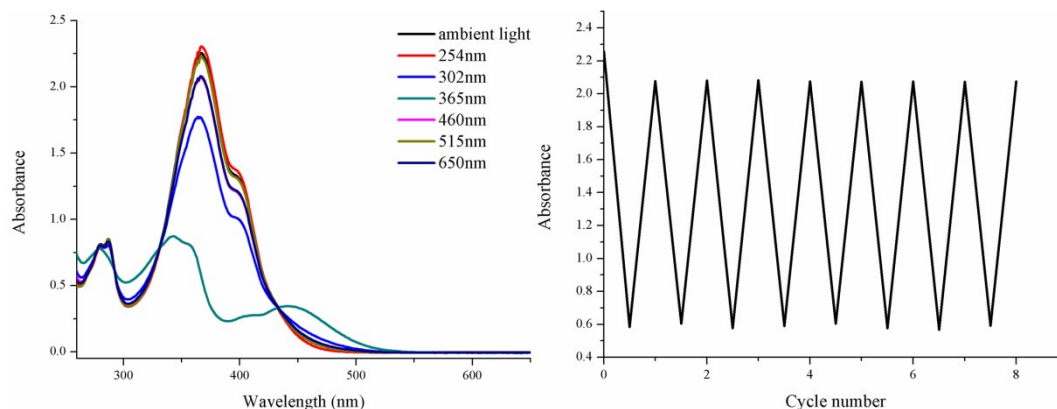

Fig. S59. UV/Vis absorption spectra of **A4** in PSSs generated by irradiations with various wavelengths of light in DMSO (left). Multiple rounds of photoswitching of **A4** by alternating 365 nm and 460 nm light irradiations in DMSO (right).

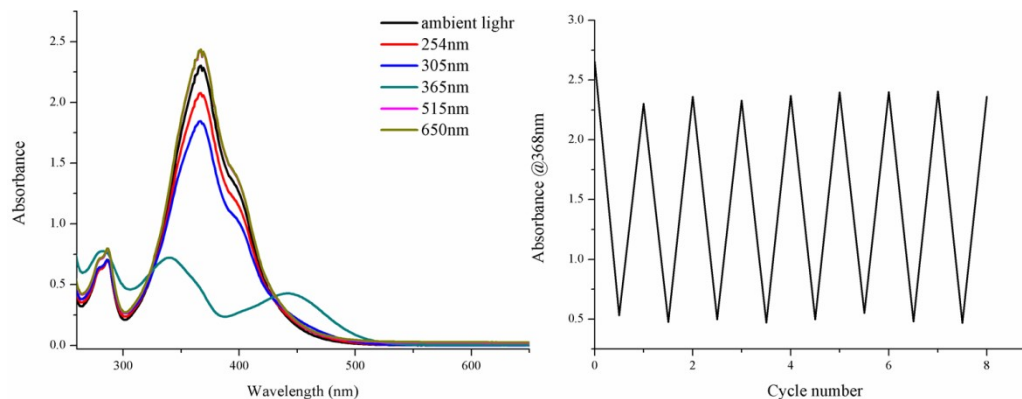

Fig. S60. UV/Vis absorption spectra of **A5** in PSSs generated by irradiations with various wavelengths of light in DMSO (left). Multiple rounds of photoswitching of **A5** by alternating 365 nm and 460 nm light irradiations in DMSO (right).

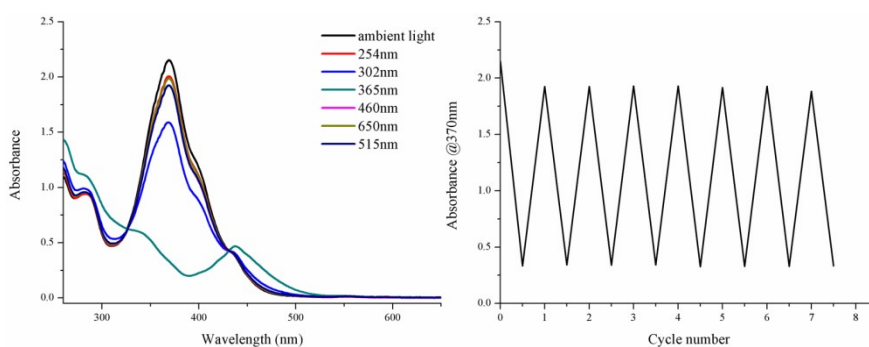

Fig. S61. UV/Vis absorption spectra of **A6** in PSSs generated by irradiations with various wavelengths of light in DMSO (left). Multiple rounds of photoswitching of **A6** by alternating 365 nm and 460 nm light irradiations in DMSO (right).

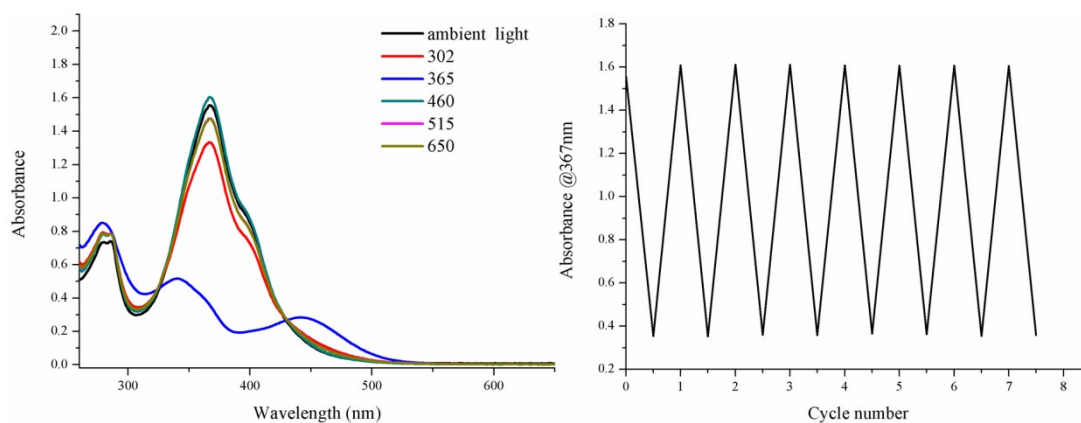

Fig. S62. UV/Vis absorption spectra of **A7** in PSSs generated by irradiations with various wavelengths of light in DMSO (left). Multiple rounds of photoswitching of **A7** by alternating 365 nm and 460 nm light irradiations in DMSO (right).

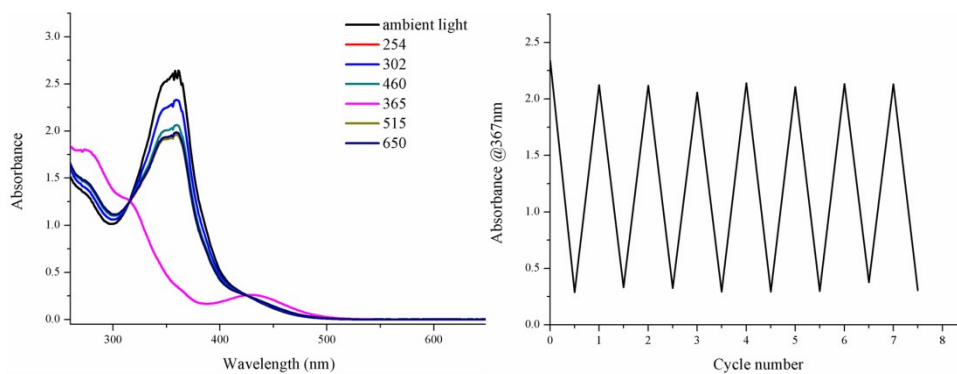

Fig. S63. UV/Vis absorption spectra of **A8** in PSSs generated by irradiations with various wavelengths of light in DMSO (left). Multiple rounds of photoswitching of **A8** by alternating 365 nm and 460 nm light irradiations in DMSO (right).

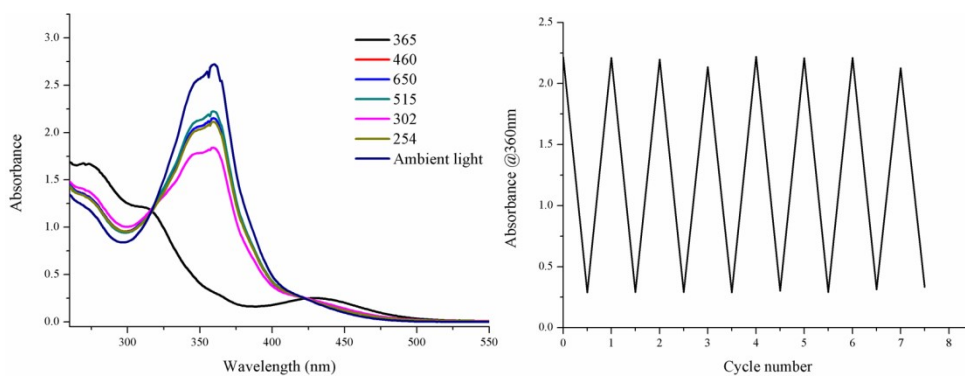

Fig. S64. UV/Vis absorption spectra of **A9** in PSSs generated by irradiations with various wavelengths of light in DMSO (left). Multiple rounds of photoswitching of **A9** by alternating 365 nm and 460 nm light irradiations in DMSO (right).

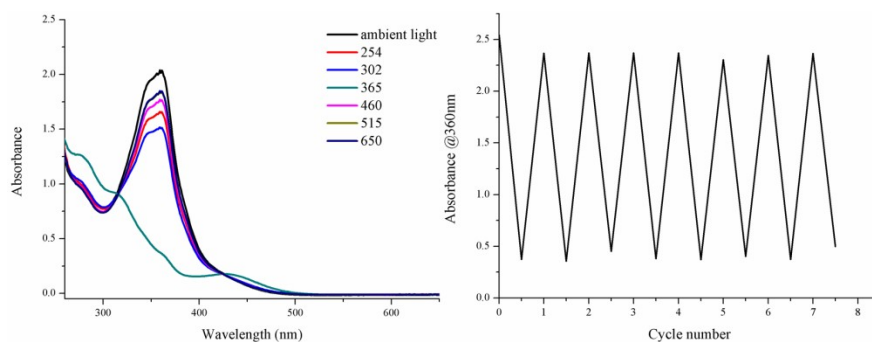

Fig. S65. UV/Vis absorption spectra of **A10** in PSSs generated by irradiations with various wavelengths of light in DMSO (left). Multiple rounds of photoswitching of **A10** by alternating 365 nm and 460 nm light irradiations in DMSO (right).

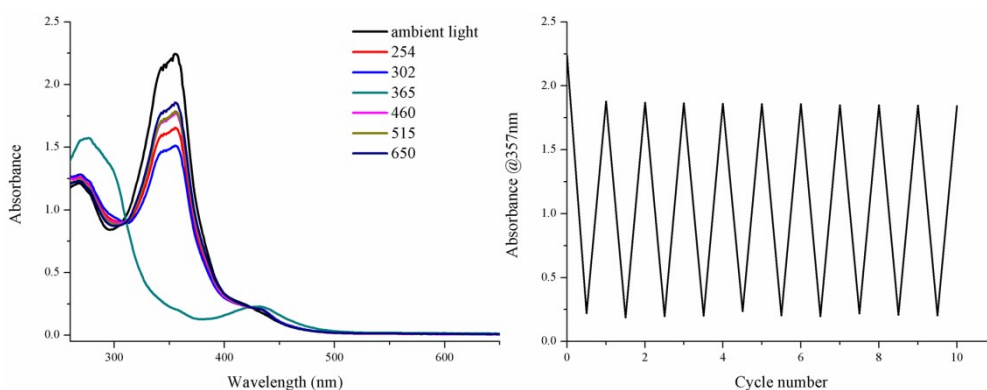

Fig. S66. UV/Vis absorption spectra of **A11** in PSSs generated by irradiations with various wavelengths of light in DMSO (left). Multiple rounds of photoswitching of **A11** by alternating 365 nm and 460 nm light irradiations in DMSO (right).

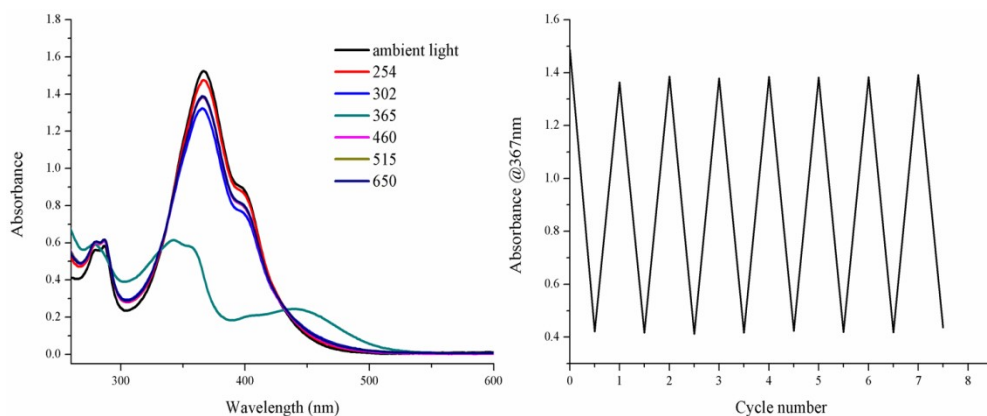

Fig. S67. UV/Vis absorption spectra of **B2** in PSSs generated by irradiations with various wavelengths of light in DMSO (left). Multiple rounds of photoswitching of **B2** by alternating 365 nm and 460 nm light irradiations in DMSO (right).

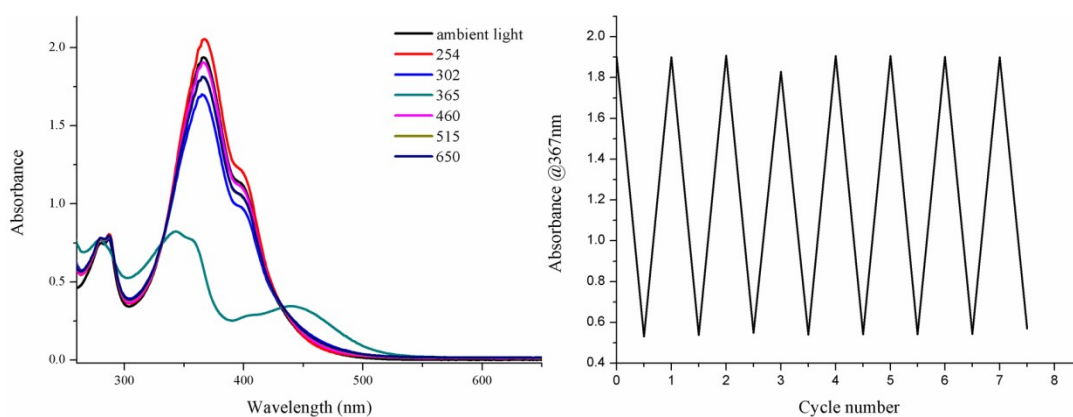

Fig. S68. UV/Vis absorption spectra of **B3** in PSSs generated by irradiations with various wavelengths of light in DMSO (left). Multiple rounds of photoswitching of **B3** by alternating 365 nm and 460 nm light irradiations in DMSO (right).

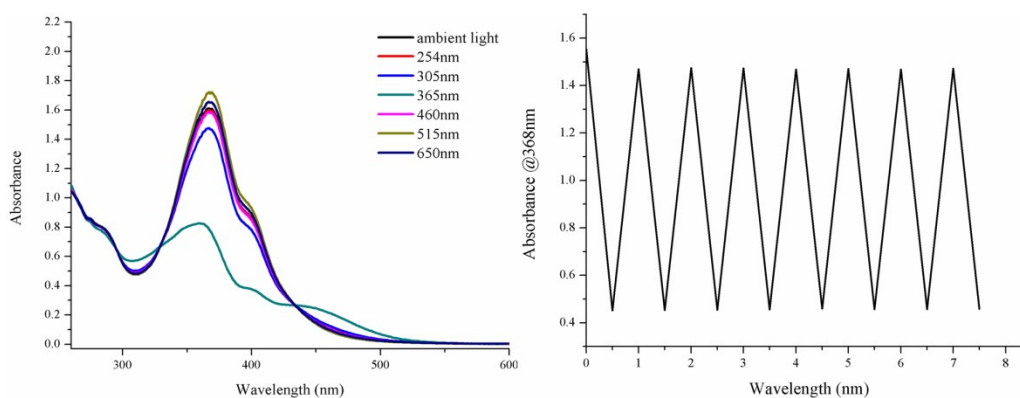

Fig. S69. UV/Vis absorption spectrum of **B4** in PSSs generated by irradiations with various wavelengths of light in DMSO (left). Multiple rounds of photoswitching of **B4** by alternating 365 nm and 460 nm light irradiations in DMSO (right).

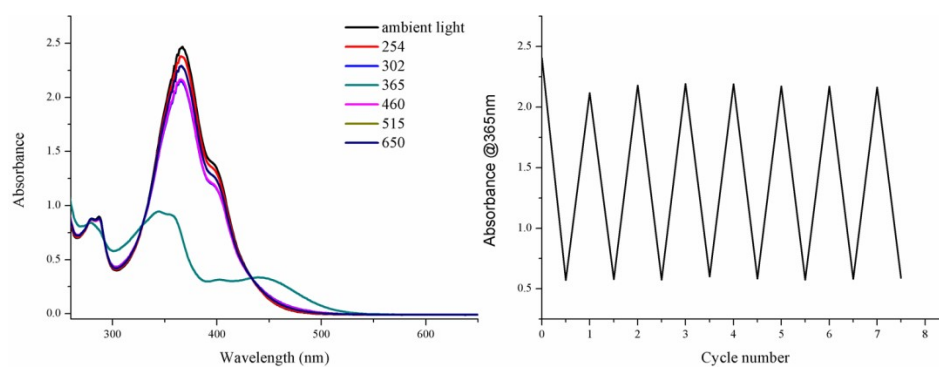

Fig. S70. UV/Vis absorption spectra of **B5** in PSSs generated by irradiations with various wavelengths of light in DMSO (left). Multiple rounds of photoswitching of **B5** by alternating 365 nm and 460 nm light irradiations in DMSO (right).

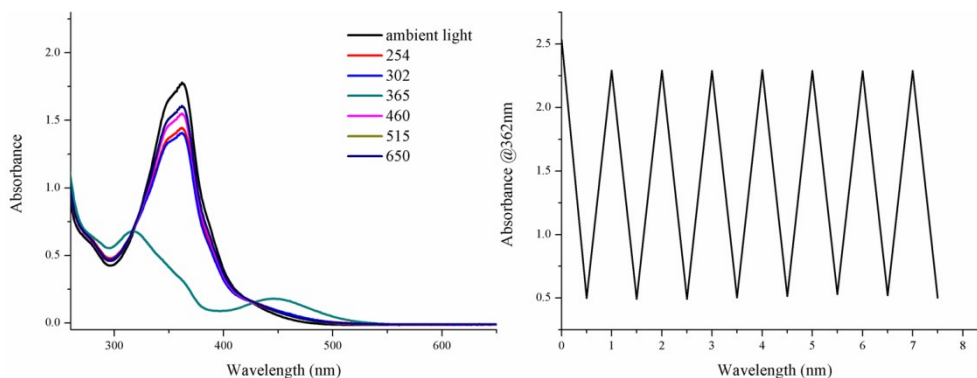

Fig. S71. UV/Vis absorption spectra of **B6** in PSSs generated by irradiations with various wavelengths of light in DMSO (left). Multiple rounds of photoswitching of **B6** by alternating 365 nm and 460 nm light irradiations in DMSO (right).

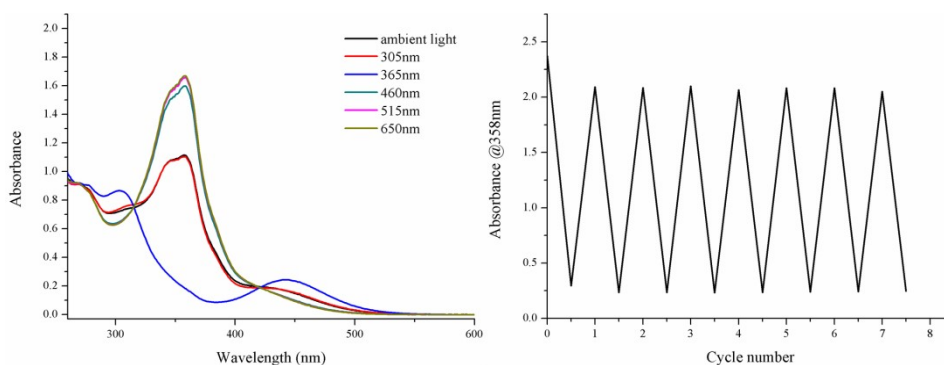

Fig. S72. UV/Vis absorption spectra of **B7** in PSSs generated by irradiations with various wavelengths of light in DMSO (left). Multiple rounds of photoswitching of **B7** by alternating 365 nm and 460 nm light irradiations in DMSO (right).

## 2.2 Determination of PSS compositions using $^1\text{H}$ NMR in $\text{DMSO-}d_6$ .



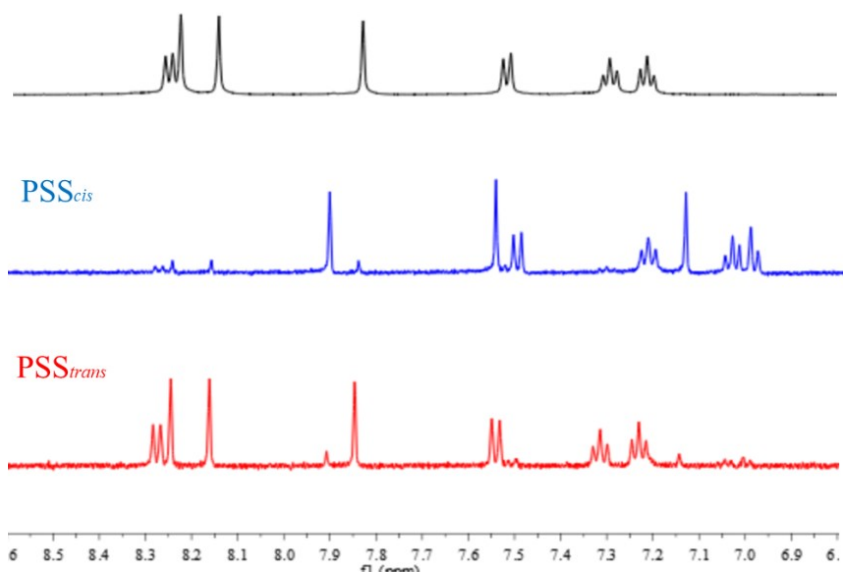

Figure S73. Expanded  $^1\text{H}$  NMR spectra showing proton signals of **A2** in DMSO.

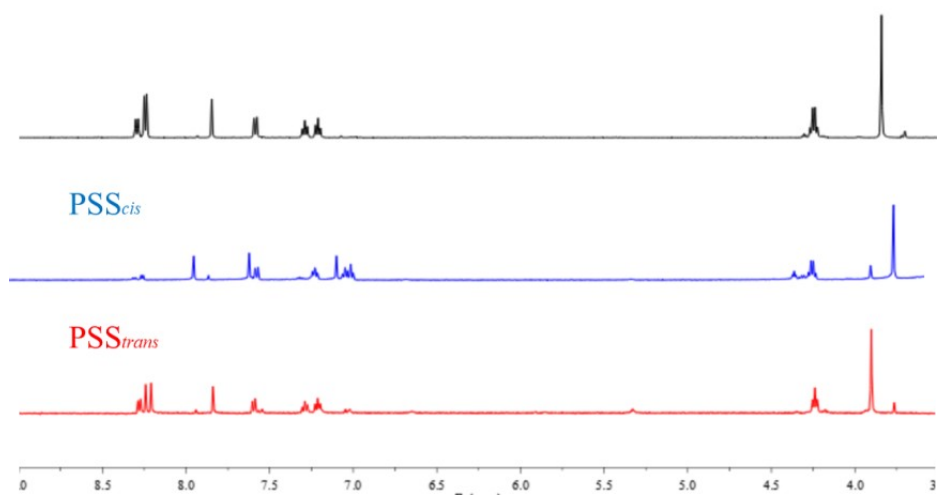

Figure S74. Expanded  $^1\text{H}$  NMR spectra showing proton signals of **A3** in DMSO.



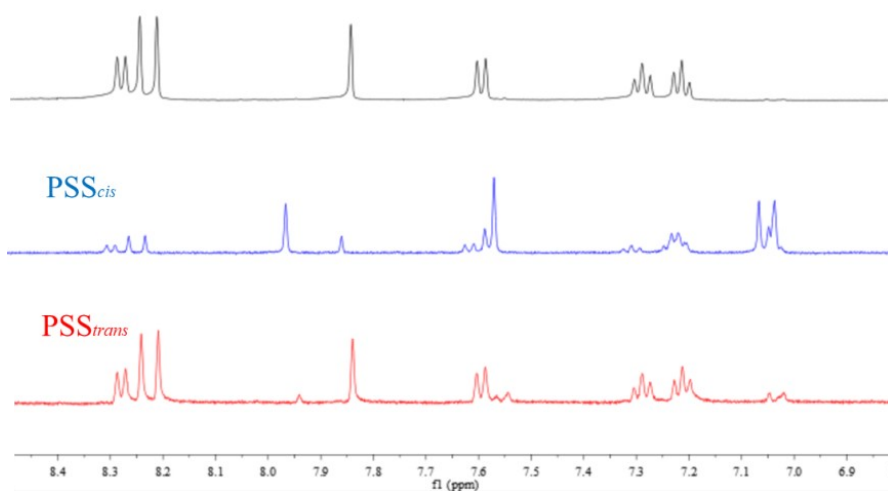

Figure S75. Expanded  $^1\text{H}$  NMR spectra showing proton signals of **A4** in DMSO.

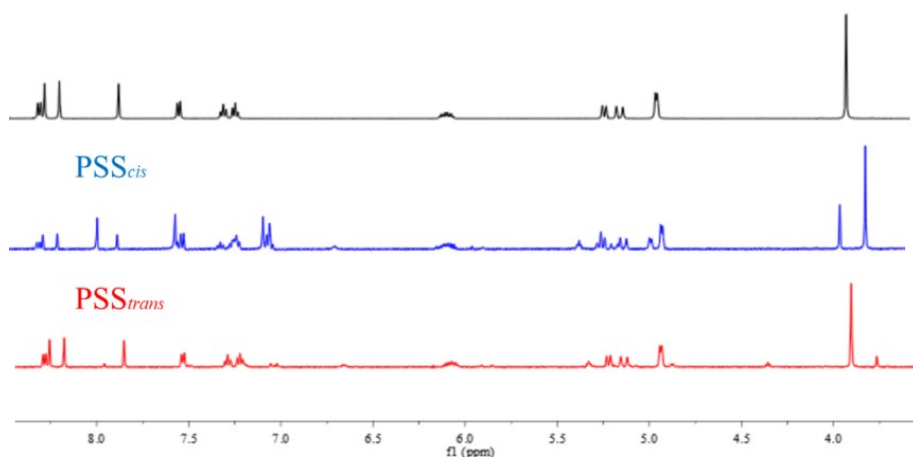

Figure S76. Expanded  $^1\text{H}$  NMR spectra showing proton signals of **A5** in DMSO.

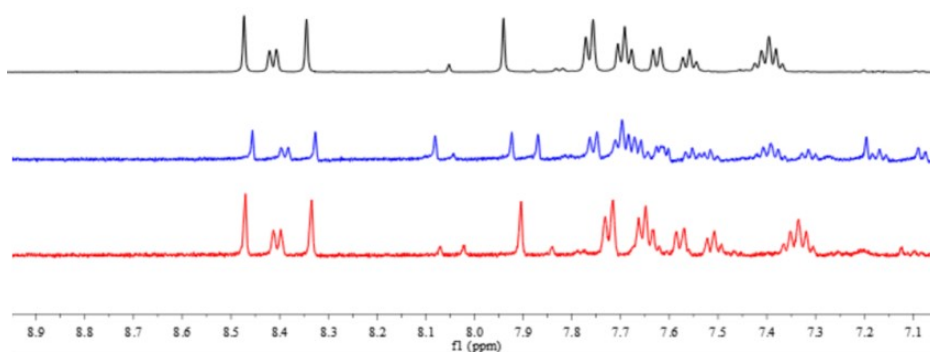

Figure S77. Expanded  $^1\text{H}$  NMR spectra showing proton signals of **A6** in DMSO.

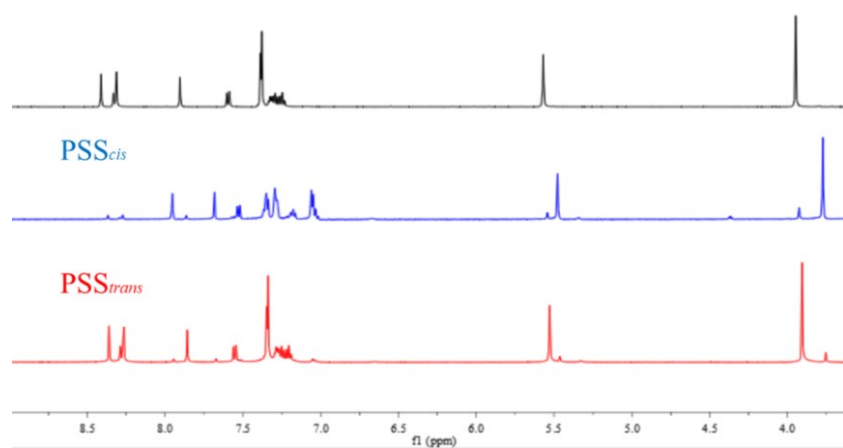

Figure S78. Expanded  $^1\text{H}$  NMR spectra showing proton signals of **A7** in DMSO.

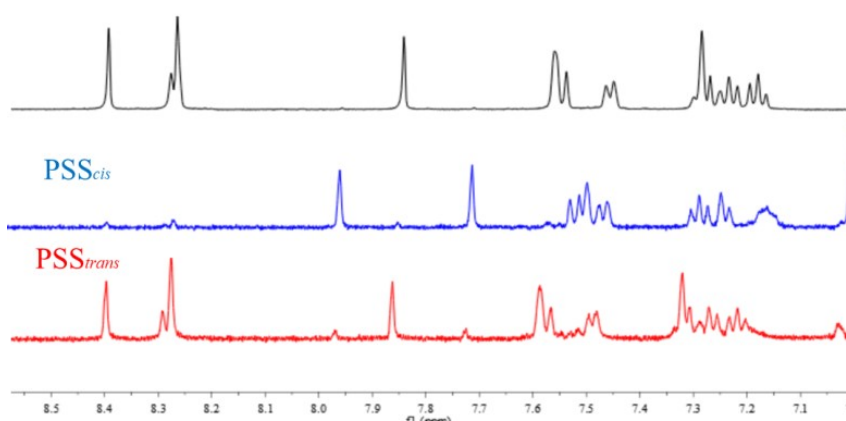

Figure S79. Expanded  $^1\text{H}$  NMR spectra showing proton signals of **A8** in DMSO.

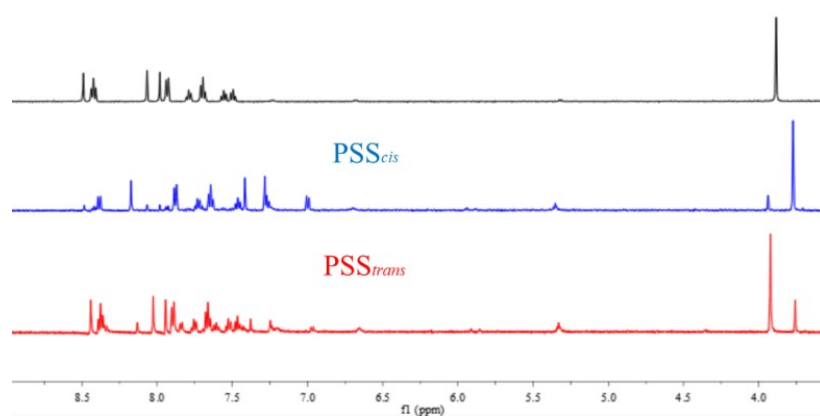

Figure S80. Expanded  $^1\text{H}$  NMR spectra showing proton signals of **A9** in DMSO.

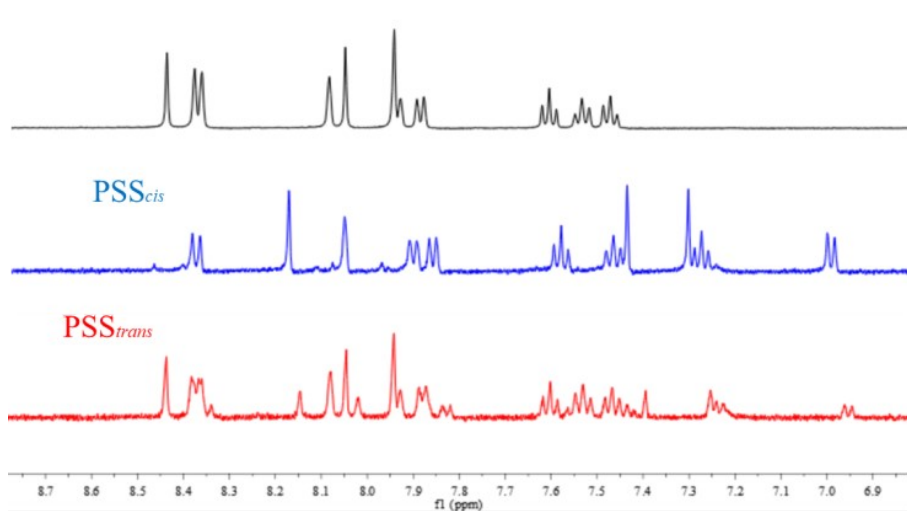

Figure S81. Expanded  $^1\text{H}$  NMR spectra showing proton signals of **A10** in DMSO.

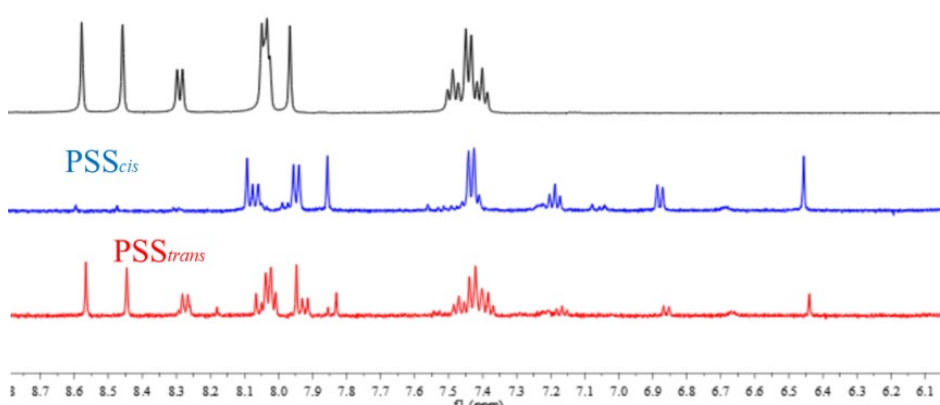

Figure S82. Expanded  $^1\text{H}$  NMR spectra showing proton signals of **A11** in DMSO.

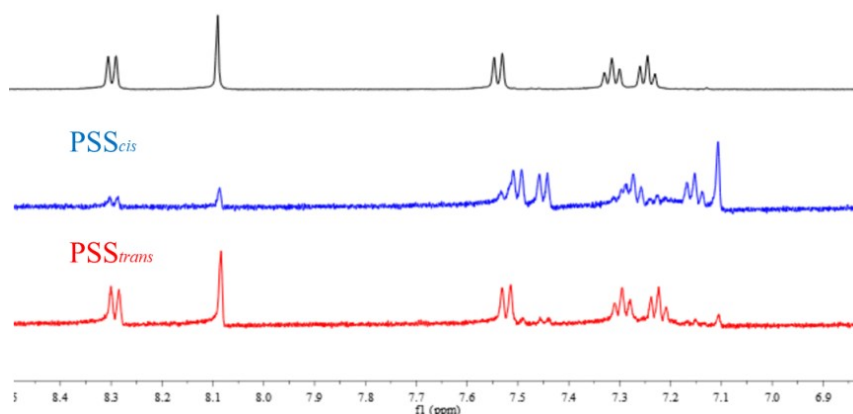

Figure S83. Expanded  $^1\text{H}$  NMR spectra showing proton signals of **B2** in DMSO.

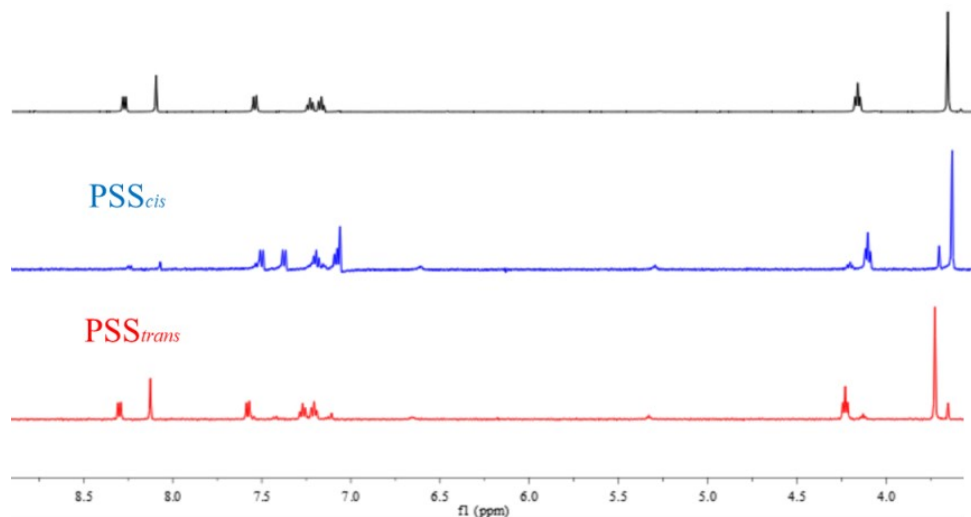

Figure S84. Expanded  $^1\text{H}$  NMR spectra showing proton signals of **B3** in  $\text{DMSO-}d_6$ .

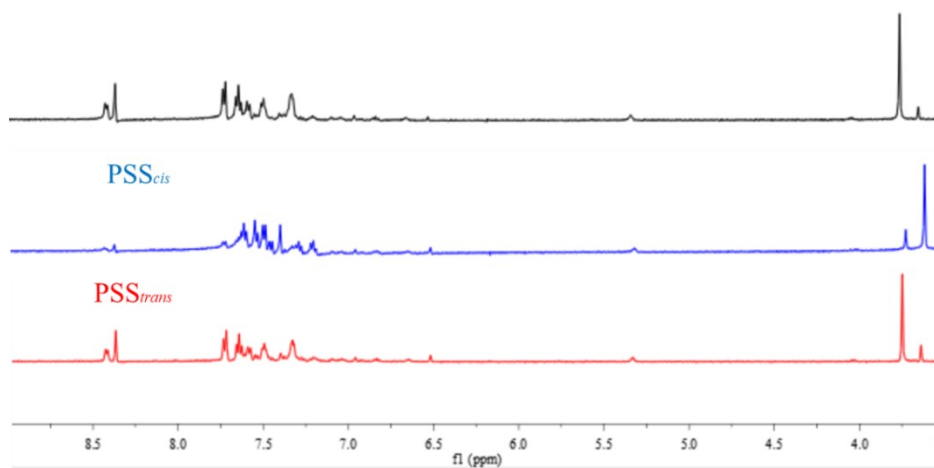

Figure S85. Expanded  $^1\text{H}$  NMR spectra showing proton signals of **B4** in  $\text{DMSO-}d_6$ .

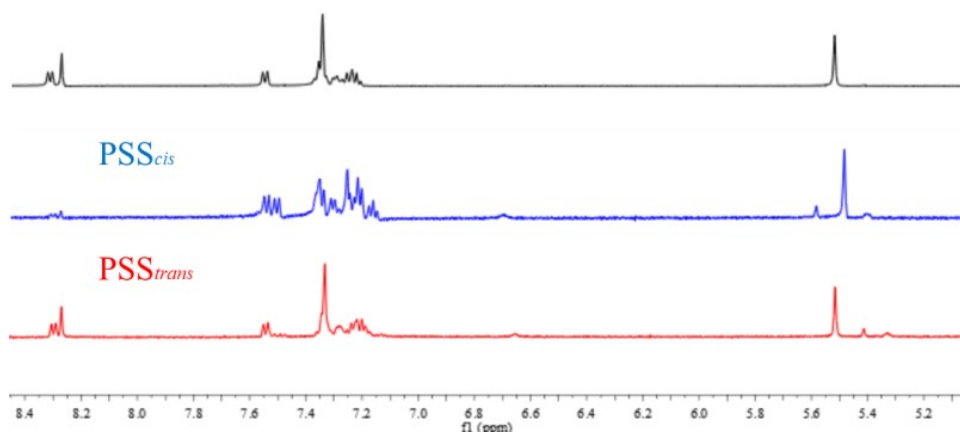

Figure S86. Expanded  $^1\text{H}$  NMR spectra showing proton signals of **B5** in  $\text{DMSO-}d_6$ .

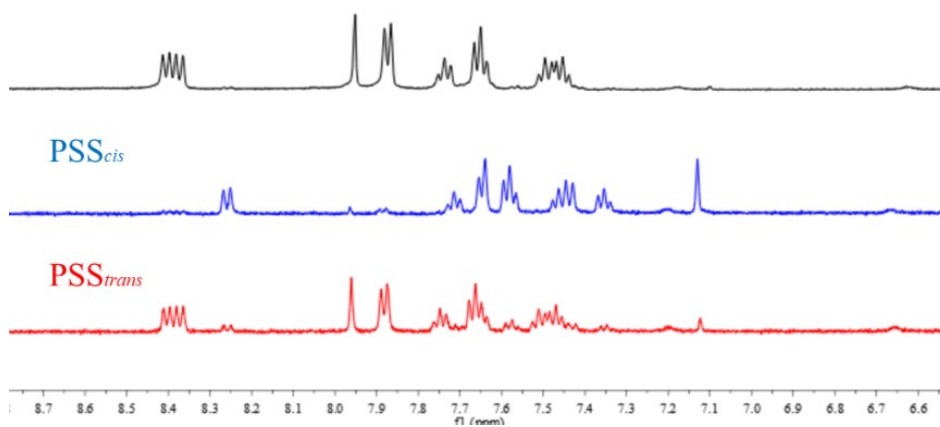

Figure S87. Expanded  $^1\text{H}$  NMR spectra showing proton signals of **B6** in  $\text{DMSO-}d_6$ .

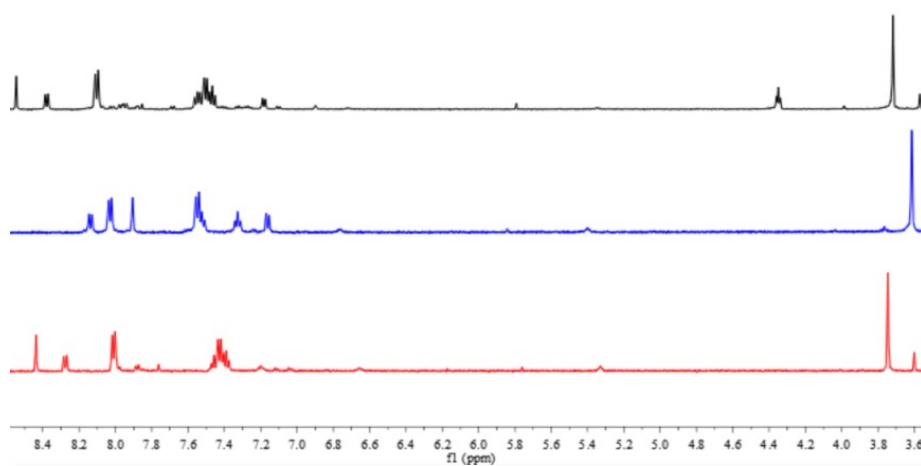

Figure S88. Expanded  $^1\text{H}$  NMR spectra showing proton signals of **B7** in  $\text{DMSO-}d_6$ .

### 2.3 The thermal half-lives of title compounds

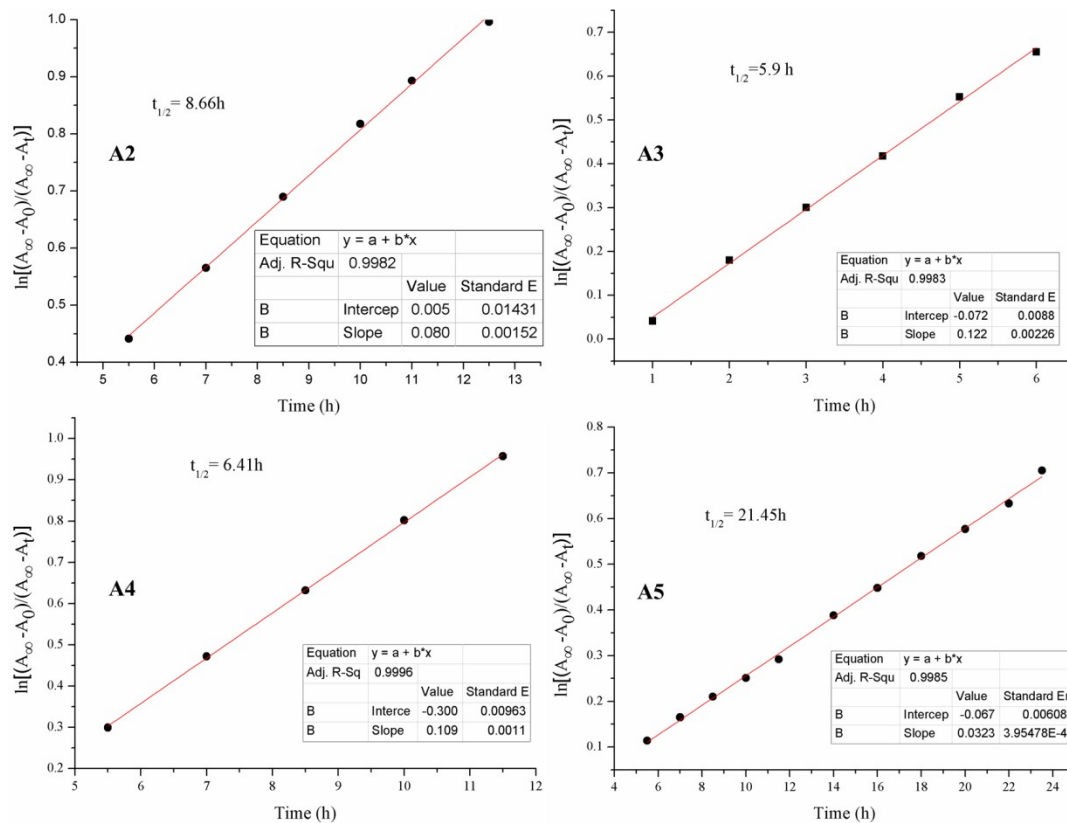

Figure S89. First-order kinetics analysis of compounds **A2**, **A3**, **A4**, and **A5**.

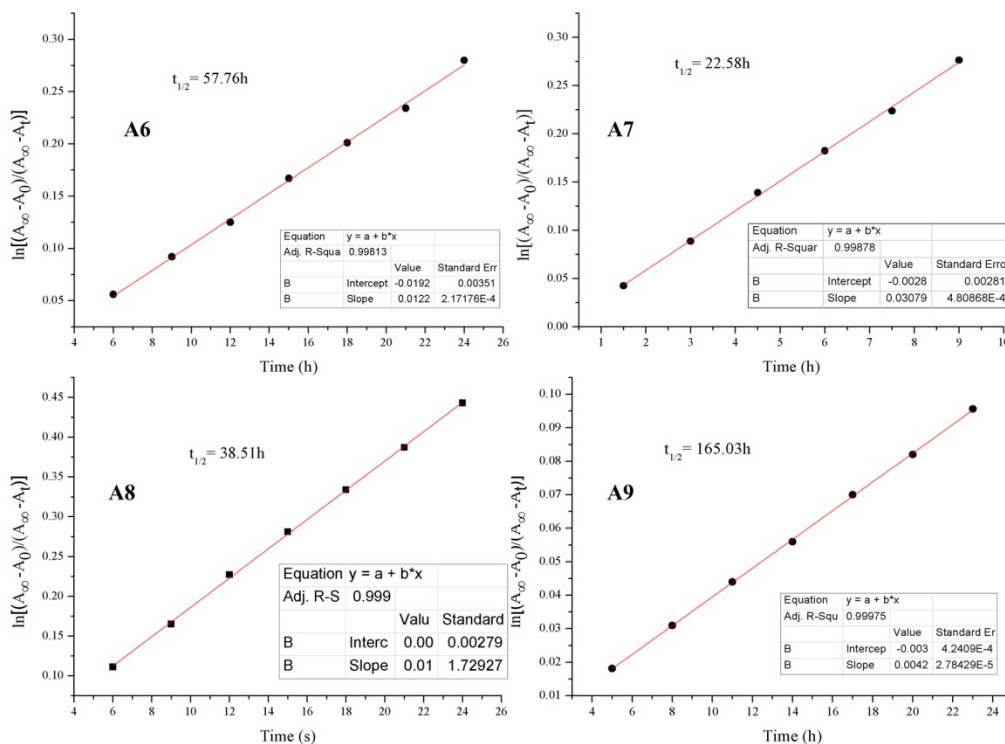

Figure S90. First-order kinetics analysis of compounds **A6**, **A7**, **A8**, and **A9**.

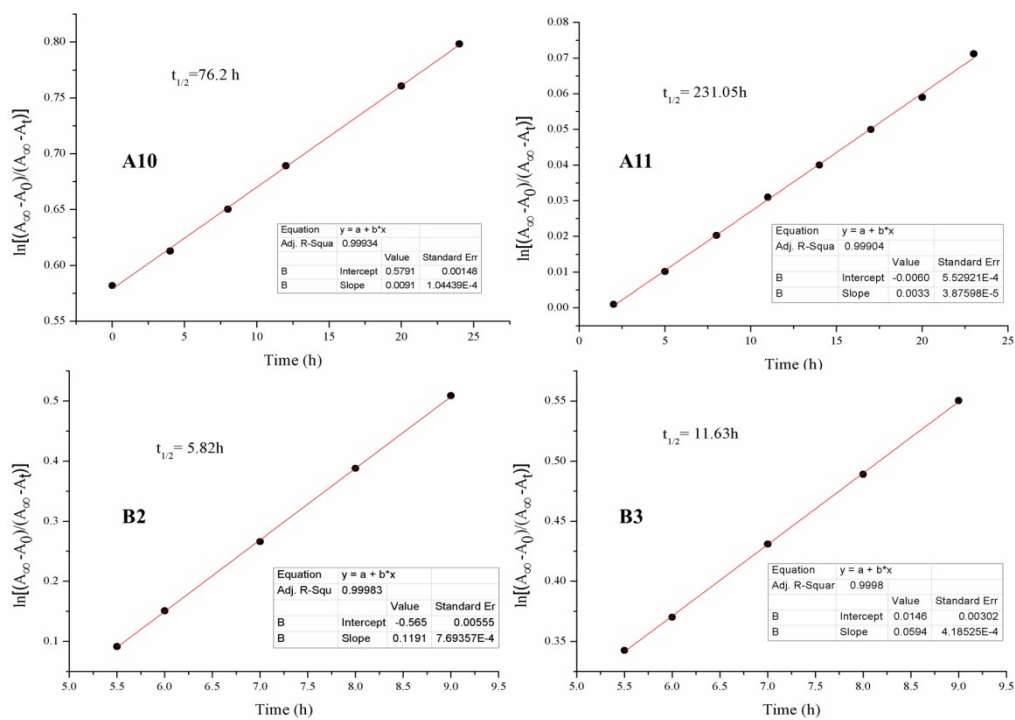

Figure S91. First-order kinetics analysis of compounds **A10**, **A11**, **B2**, and **B3**.

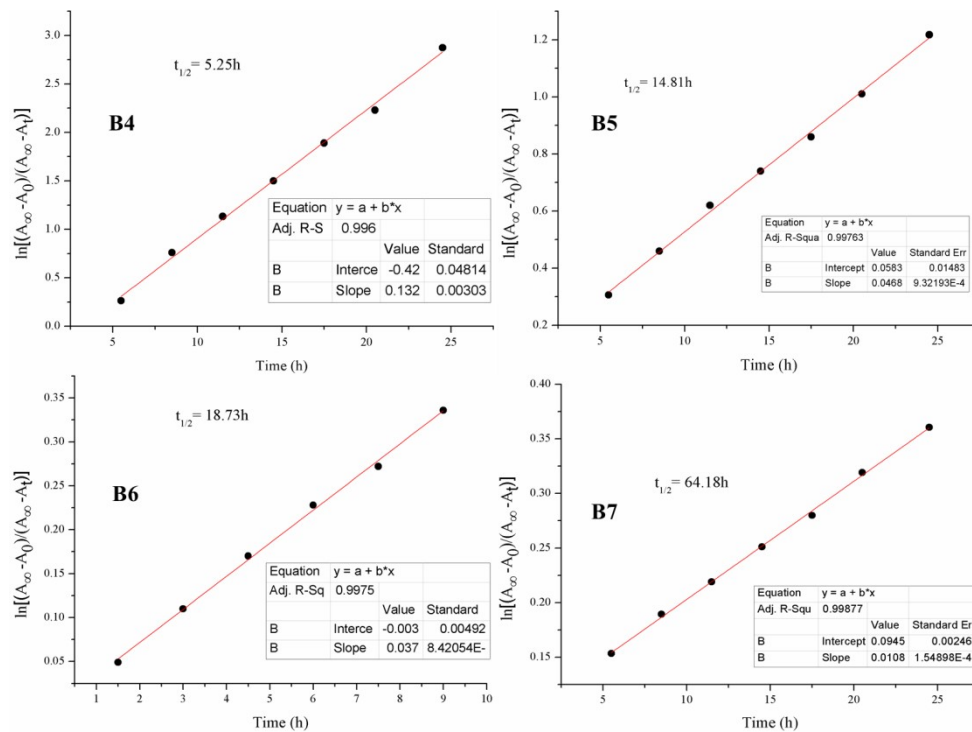

Figure S92. First-order kinetics analysis of compounds **B4**, **B5**, **B6**, and **B7**.

## 2.4 First-order kinetics analysis thermal isomerization of A9, A11, and B7

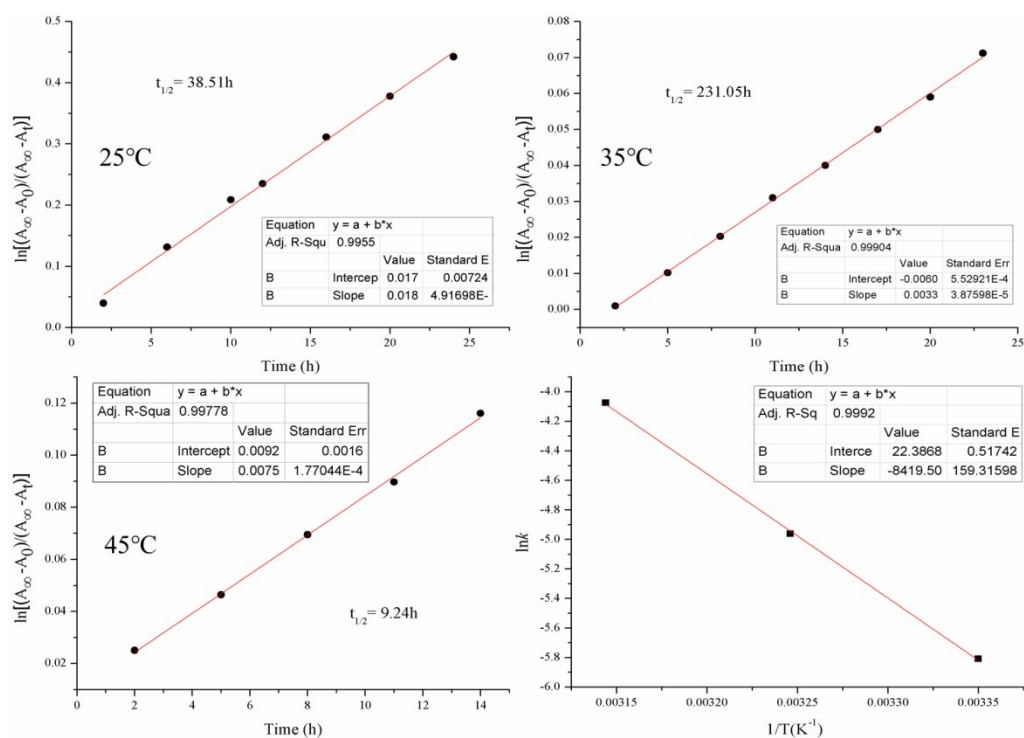

Figure S93. First-order kinetics analysis and Arrhenius plot for thermal isomerization of compound A9 in DMSO.

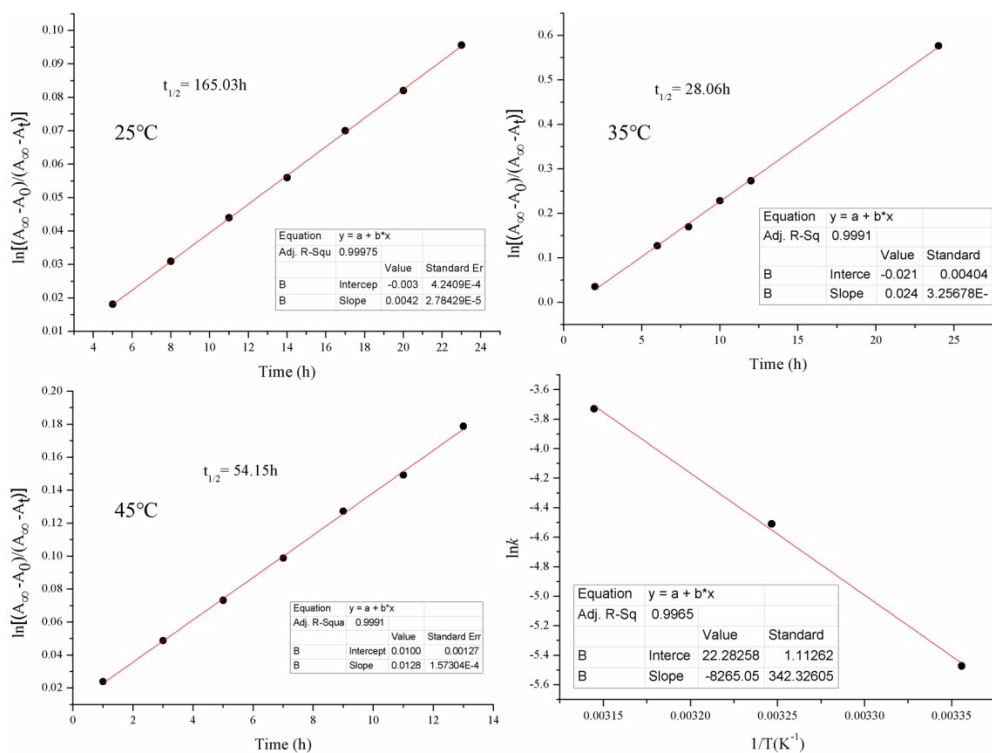



Figure S94. First-order kinetics analysis and Arrhenius plot for thermal isomerization of compound **A11** in DMSO.

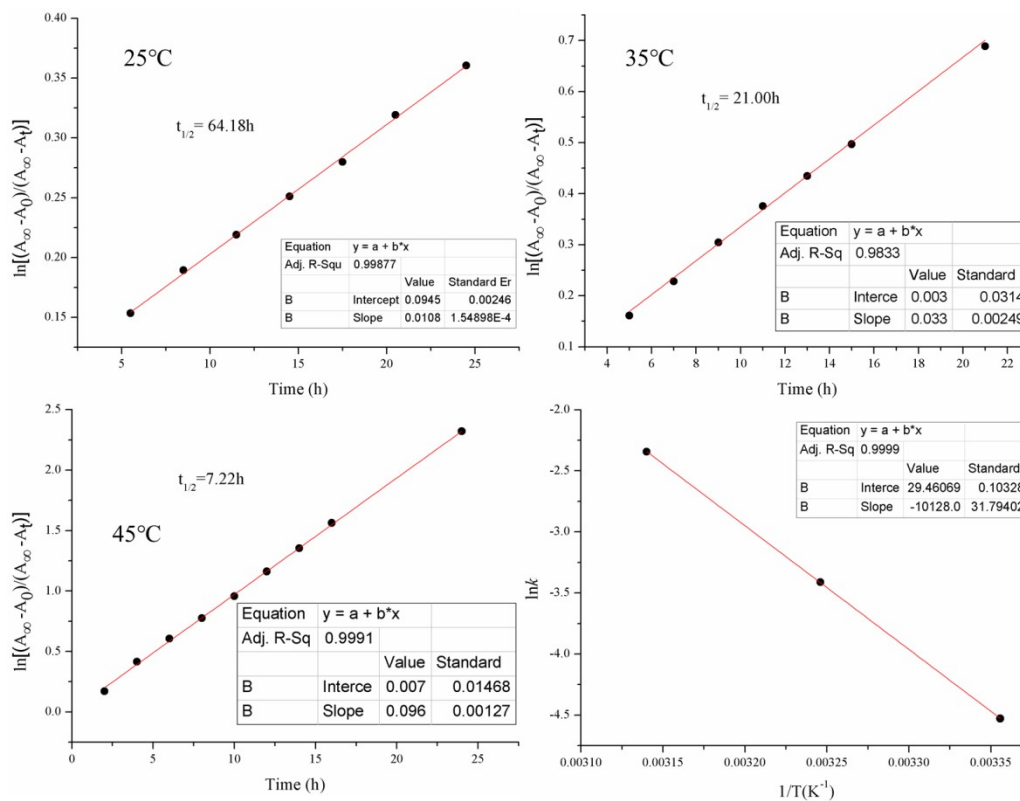

Figure S95. First-order kinetics analysis and Arrhenius plot for thermal isomerization of compound **B7** in DMSO.

### 3 Biological application

#### 3.1 Photoisomerization and half-lives in 10% phosphate buffer (pH 7.5)-DMSO mixture

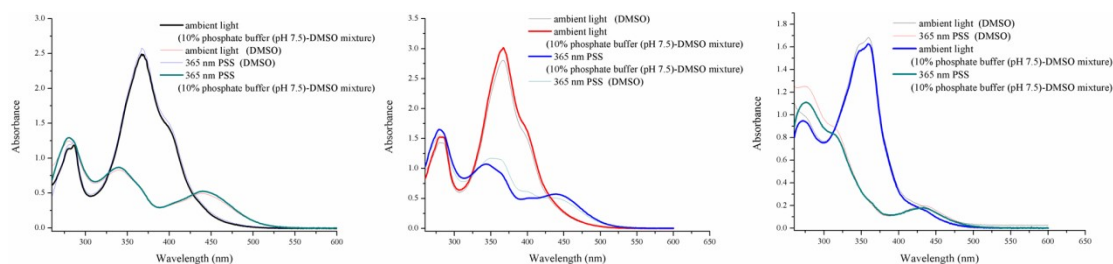

Figure S96. UV-vis absorption spectra of **A3**, **A8**, and **A10** in PSSs generated by irradiations with 365 and 460 nm of light in 10% phosphate buffer (pH 7.5)-DMSO mixture and DMSO.

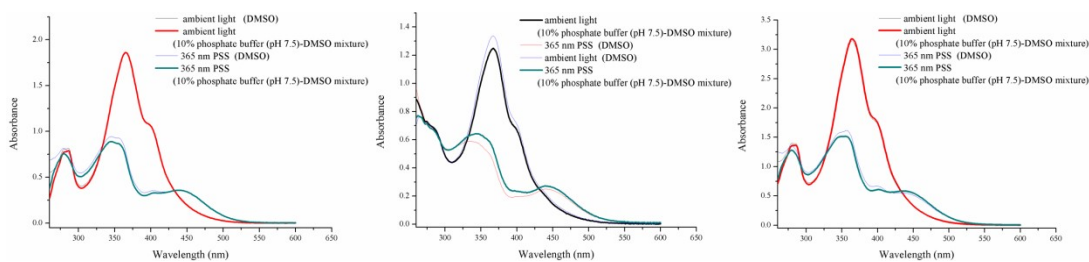

Figure S97. UV-vis absorption spectra of **B2**, **B4**, and **B7** in PSSs generated by irradiations with 365 and 460 nm of light in 10% phosphate buffer (pH 7.5)-DMSO mixture and DMSO.

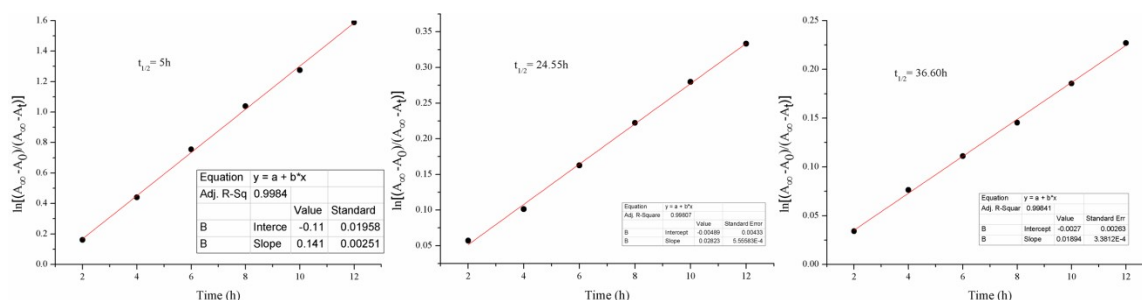

Figure S98. First-order kinetics analysis of compounds **A3**, **A8**, and **A10** in 10% phosphate buffer (pH 7.5)-DMSO mixture.

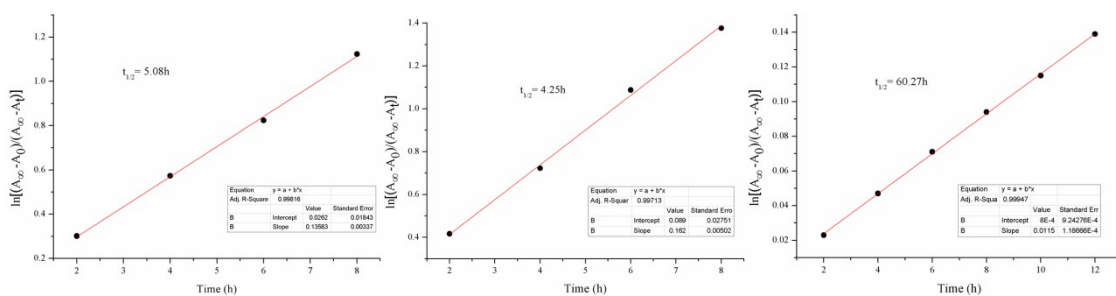

Figure S99. First-order kinetics analysis of compounds **B2**, **B4**, and **B7** in 10% phosphate buffer (pH 7.5)-DMSO mixture.

### 3.2 the information of bi-functional model molecule **C1**.

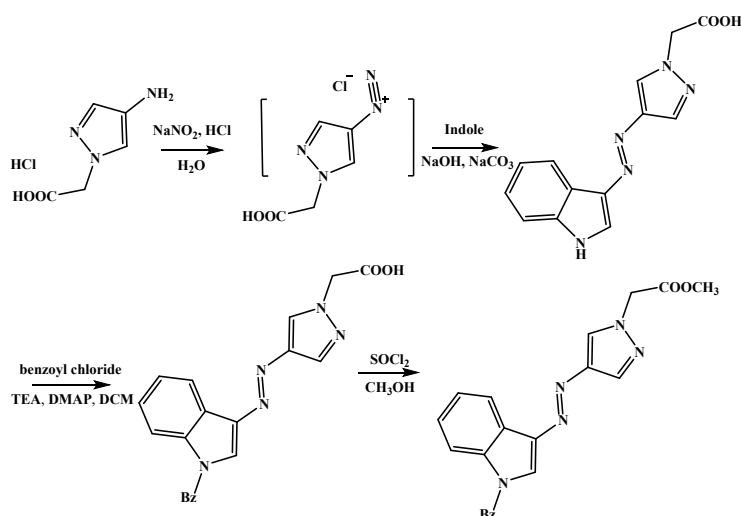

The synthesis route to 2-(4-((1H-indol-3-yl)diazenyl)-1H-pyrazol-1-yl)acetic acid is similar to **3**. To a solution of 2-(4-((1H-indol-3-yl)diazenyl)-1H-pyrazol-1-yl)acetic (0.81 g, 3 mmol) in DCM (20 mL), DMAP (1.1 g, 9 mmol), TEA (1.4 mL, 10 mmol) were added. After 3 min benzoyl chloride (0.5 g, 3.6 mmol) was added and the reaction mixture was stirred overnight from 0 °C to room temperature. The solvent was removed under reduced pressure, gave the intermediate Indoleamide (0.97 g, yield with 87%).

2-(4-((1-benzoyl-1H-indol-3-yl)diazenyl)-1H-pyrazol-1-yl)acetic acid (0.75 g, 2 mmol) was dissolved in 30 methanol, SOCl<sub>2</sub> (0.9 mL, 12 mmol) was added and the reaction mixture was stirred for 4 h at 80 °C. purification by column chromatography (ethyl acetate-Petroleum ether: 1:3) gave the product **C1** (0.69 g, yield with 90%).

**C1**: <sup>1</sup>H NMR (500 MHz, DMSO) δ 8.49 (s, 1H), 8.42 – 8.33 (m, 2H), 8.06 (s, 1H), 8.00 (s, 1H), 7.89 (d, *J* = 6.9 Hz, 2H), 7.74 (d, *J* = 7.1 Hz, 1H), 7.66 (d, *J* = 6.8 Hz, 2H), 7.50 (dd, *J* = 22.0, 7.2 Hz, 2H), 5.19 (s, 2H), 3.72 (s, 3H); <sup>13</sup>C NMR (126 MHz, DMSO) δ 168.84, 168.78, 137.62, 136.44, 133.75, 133.05, 132.58, 131.19, 131.19, 129.79, 129.34, 129.17, 126.90, 125.91, 123.00, 122.65, 116.34, 53.48, 52.87; Elemental analysis (%) calcd. for C<sub>21</sub>H<sub>17</sub>N<sub>5</sub>O<sub>3</sub> (387.13): C 65.11, H 4.42, N 18.08, O 12.39; Found: C 65.17, H 4.40, N 18.07, O 12.36.

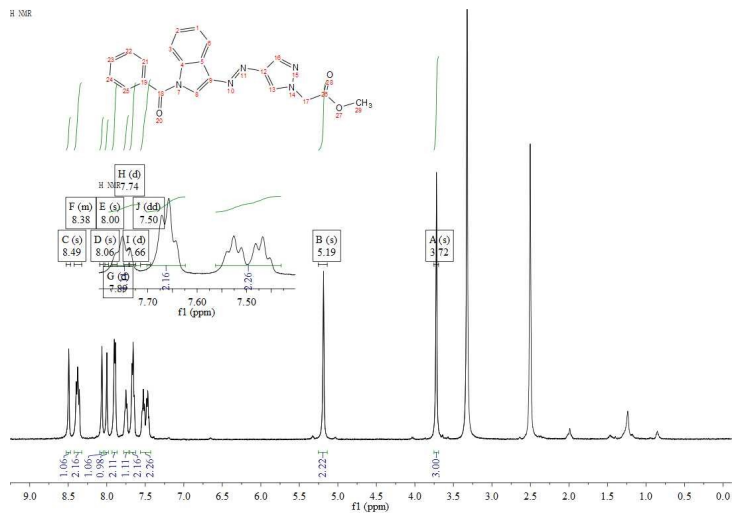

Figure S100. Expanded  $^1\text{H}$  NMR spectra showing proton signals of **C1** in DMSO.

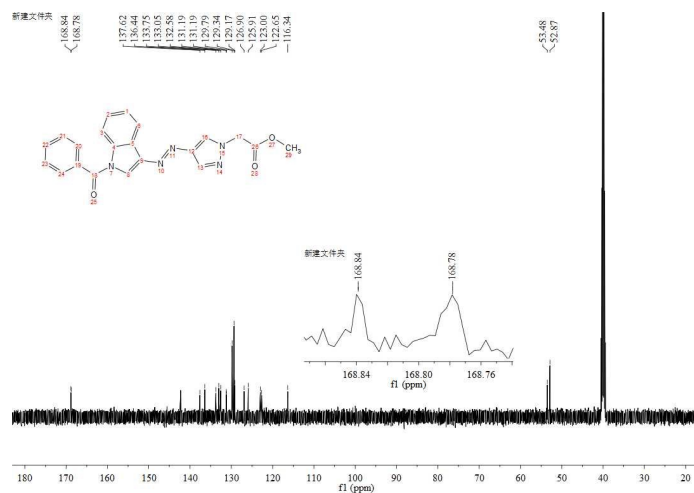

Figure S101. Expanded  $^{13}\text{C}$  NMR spectra showing carbon signals of **C1** in DMSO.

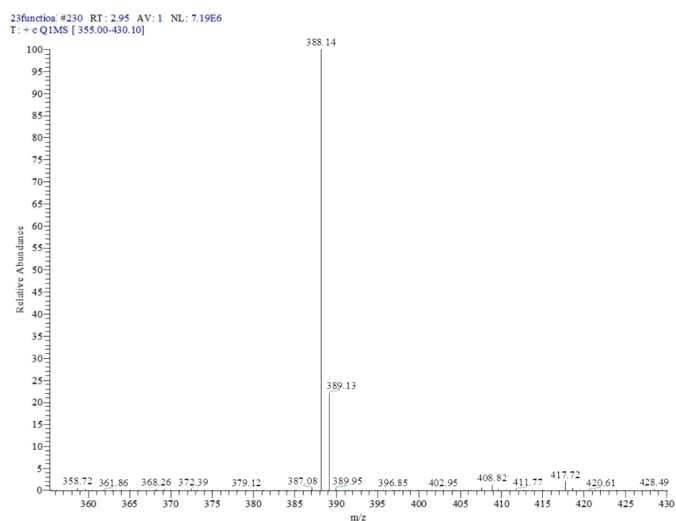

Figure S102. The mass spectrum of

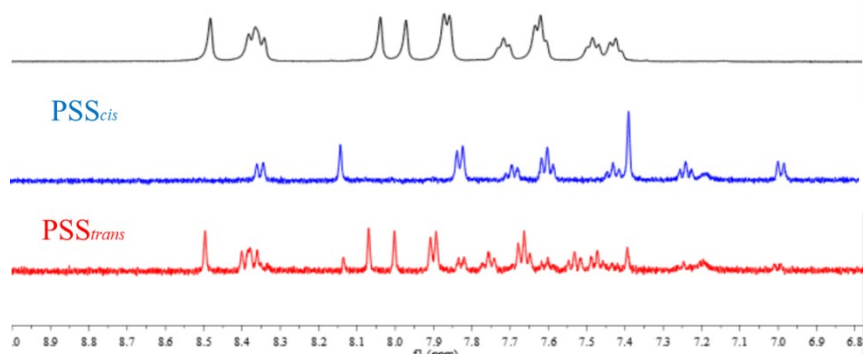

Figure S103. Expanded  $^1\text{H}$  NMR spectra showing proton signals of **C1** in  $\text{DMSO-}d_6$ .

## 4 DFT calculations<sup>S5</sup>

### 4.1 Computed and experimental UV/Vis Spectra

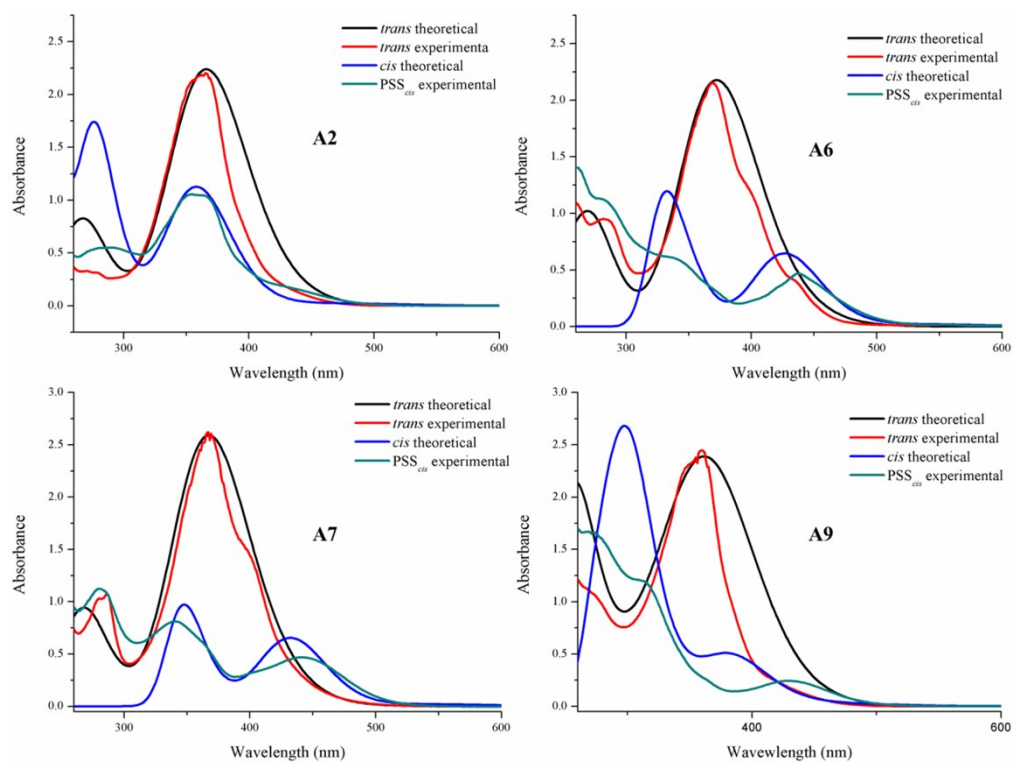

Figure S104. Comparison between the calculated and experimental absorption spectra of **A2**, **A6**, **A7**, **A9**.

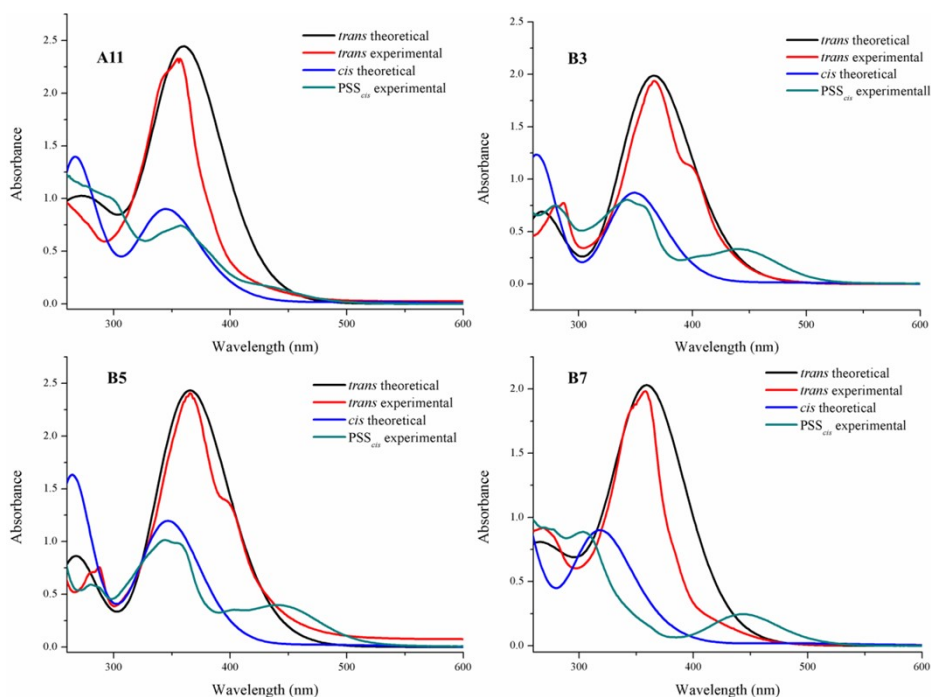

Figure S105. Comparison between the calculated and experimental absorption spectra of **A11**, **B3**, **B5**, **B7**.

#### 4.2 the energy of calculations

Table S4. The energy (Hartree) TS-1, TS-2, and *cis*-isomer by Gauss calculations (**A9**, **A11**, and **B7**).

| Compd. | TS-1       | TS-2       | <i>Cis</i> -isomer |
|--------|------------|------------|--------------------|
| A9     | -1540.1519 | -1540.1105 | -1540.1981         |
| A11    | -1069.1888 | -1069.1456 | -1069.2353         |
| B7     | -1578.9520 | -1578.3637 | -1617.8487         |

#### 4.3 The diagrams and energy for Frontier MOs of compounds

Table S5. The energy (eV) of Frontier MOs (**A1**—**A5**).

| Compd. | <b>A1</b>    |            | <b>A2</b>    |            | <b>A3</b>    |            | <b>A4</b>    |            | <b>A5</b>    |            |
|--------|--------------|------------|--------------|------------|--------------|------------|--------------|------------|--------------|------------|
|        | <i>trans</i> | <i>cis</i> |
| HOMO-2 | -9.400       | -9.385     | -9.067       | -9.384     | -9.065       | -9.384     | -9.066       | -9.393     | -9.081       |            |
| HOMO-1 | -8.713       | -8.649     | -8.743       | -8.628     | -8.720       | -8.625     | -8.717       | -8.626     | -8.710       |            |
| HOMO   | -7.632       | -7.527     | -8.045       | -7.525     | -8.042       | -7.525     | 8.037        | -7.567     | -8.057       |            |
| LUMO   | 2.121        | 2.136      | 2.340        | 2.125      | 2.320        | 2.123      | 2.325        | 2.103      | 2.292        |            |
| LUMO+1 | 3.548        | 3.551      | 3.617        | 3.538      | 3.605        | 3.537      | 3.602        | 3.541      | 3.603        |            |
| LUMO+2 | 4.571        | 4.520      | 4.393        | 4.538      | 4.391        | 4.535      | 4.399        | 4.410      | 4.350        |            |

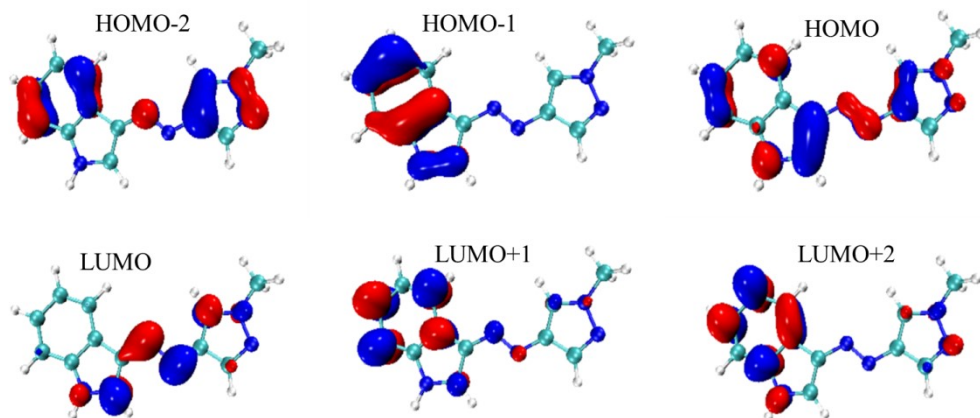

Frontier MOs of **A1**

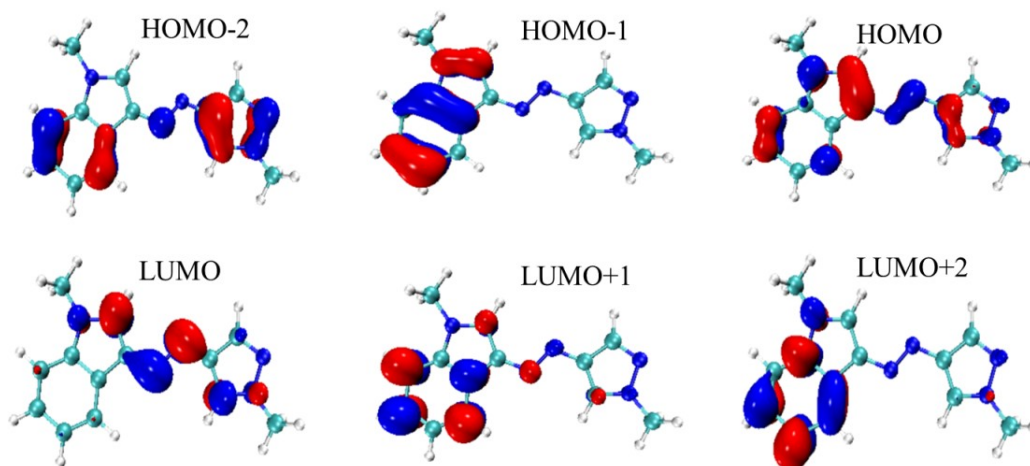

Frontier MOs of **A2 trans**

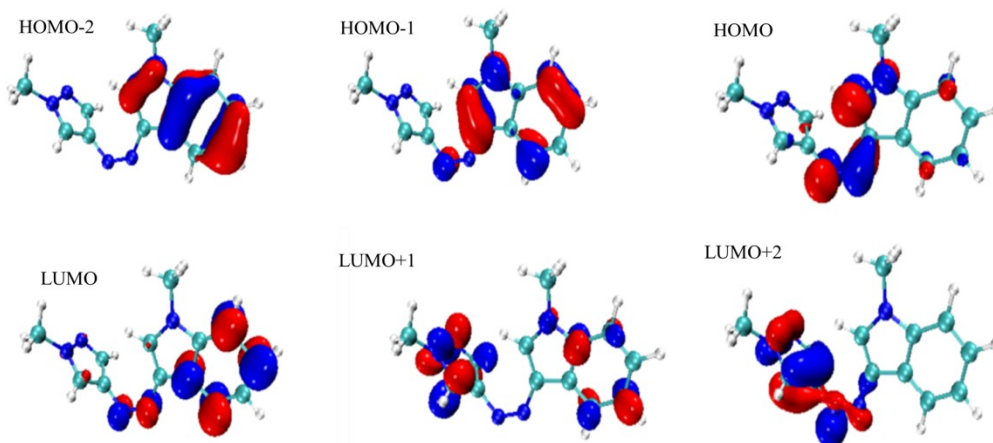

Frontier MOs of **A2 cis**



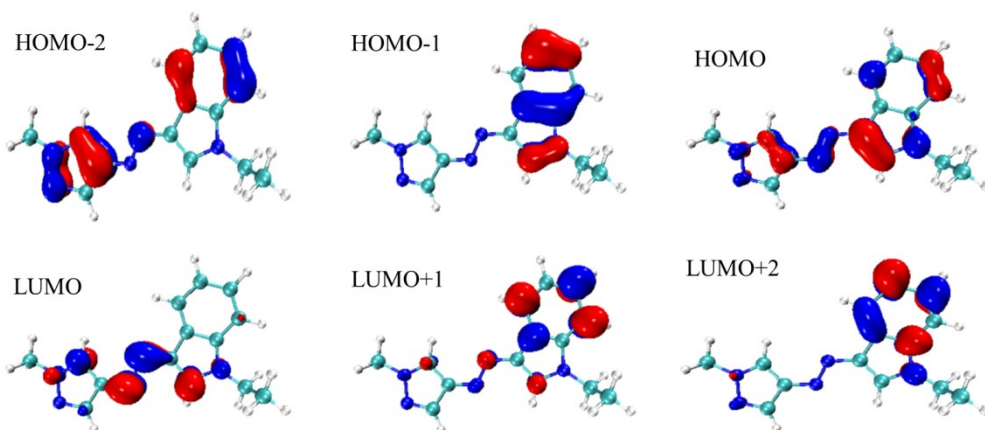

Frontier MOs of **A3 trans**

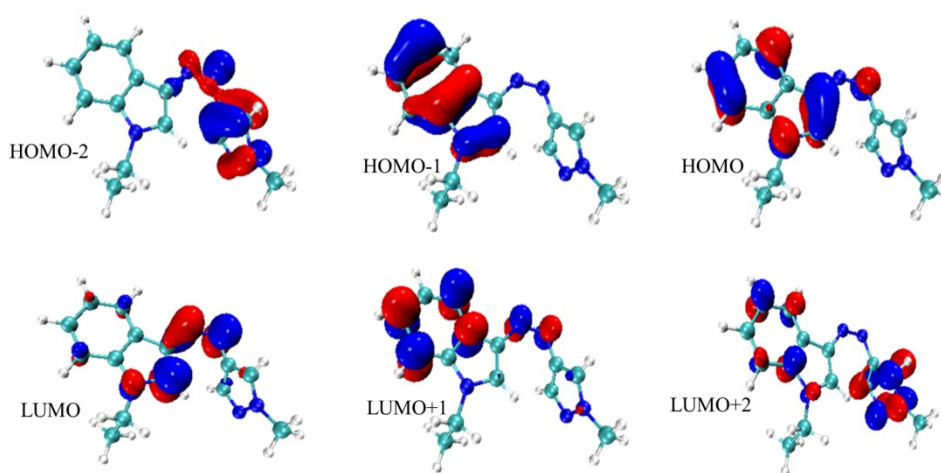

Frontier MOs of **A3 cis**

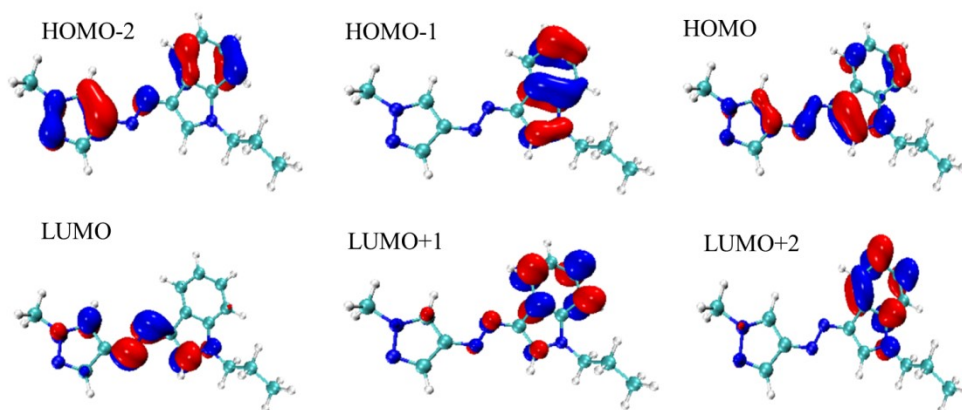

Frontier MOs of **A4 trans**



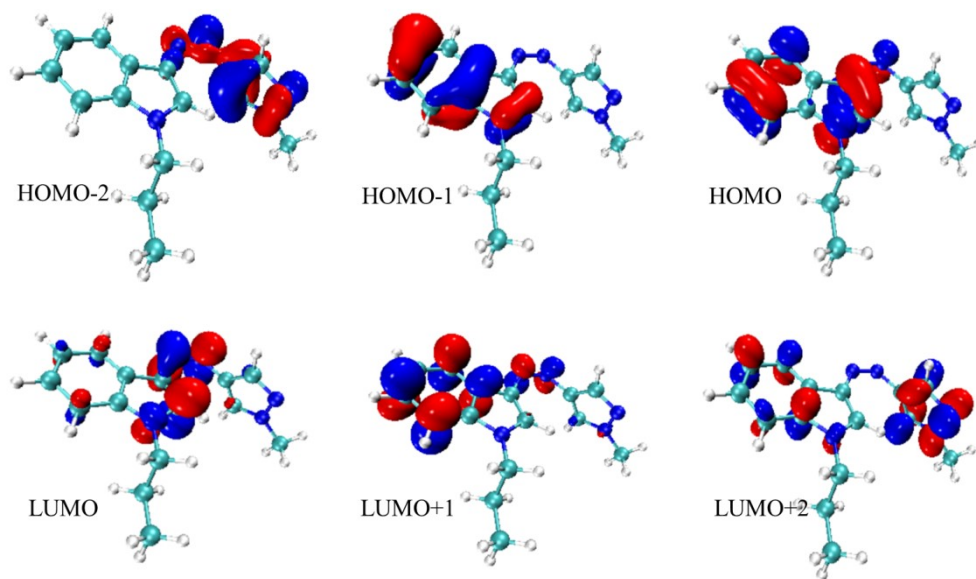

Frontier MOs of **A4 cis**

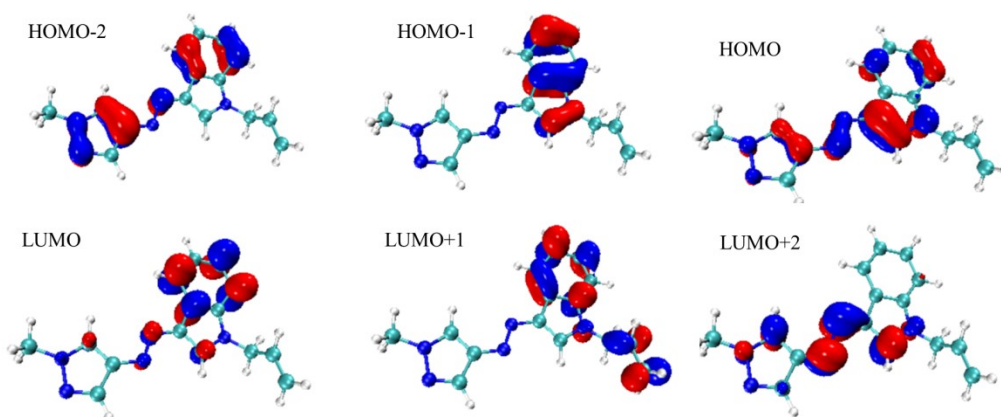

Frontier MOs of **A5 trans**

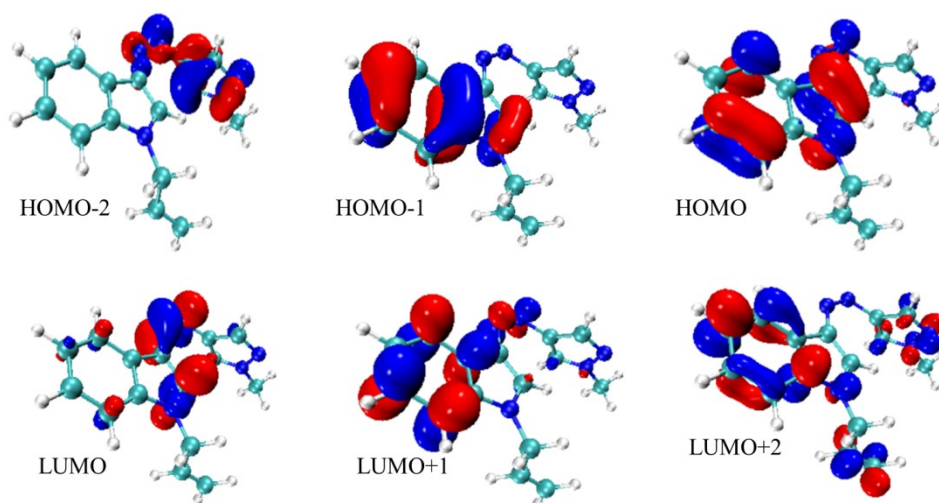

Frontier MOs of **A5 cis**

Table S6. The energy (eV) of Frontier MOs (**A6**—**A10**).

| Compd. | <b>A6</b>    |            | <b>A7</b>    |            | <b>A8</b>    |            | <b>A9</b>    |            | <b>A10</b>   |            |
|--------|--------------|------------|--------------|------------|--------------|------------|--------------|------------|--------------|------------|
|        | <i>trans</i> | <i>cis</i> |
| HOMO-2 | -9.410       | -9.113     | -9.328       | -9.092     | -9.320       | -9.110     | -9.478       | -9.434     | -9.461       | -9.444     |
| HOMO-1 | -8.680       | -8.766     | -8.694       | -8.781     | -8.721       | -8.808     | -9.024       | -9.045     | -9.059       | -9.080     |
| HOMO   | -7.634       | -8.119     | -7.584       | -8.082     | -7.614       | -8.107     | -7.992       | -8.422     | -8.021       | -8.569     |
| LUMO   | 2.011        | 2.185      | 2.089        | 2.280      | 2.070        | 2.251      | 1.663        | 2.160      | 1.614        | 1.960      |
| LUMO+1 | 3.459        | 3.434      | 3.520        | 3.562      | 3.358        | 3.328      | 2.392        | 2.501      | 2.259        | 2.480      |
| LUMO+2 | 3.484        | 3.493      | 3.697        | 3.669      | 3.454        | 3.439      | 3.262        | 3.000      | 3.107        | 2.913      |

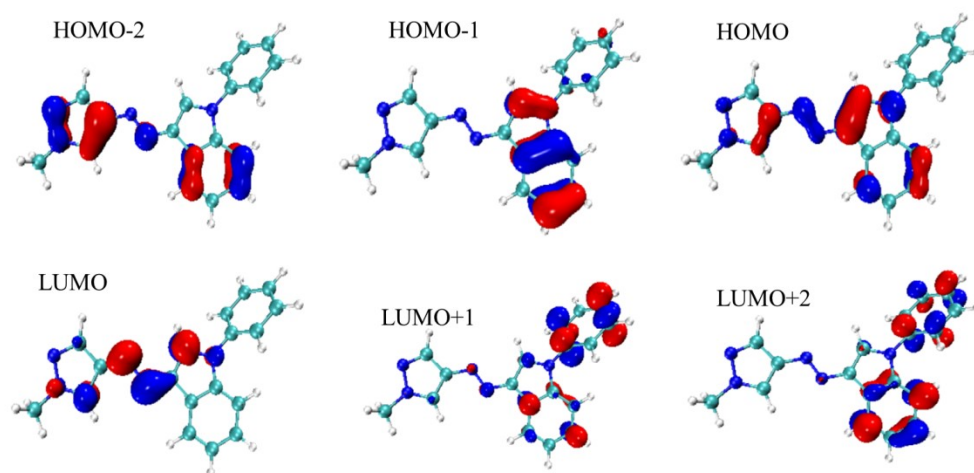

Frontier MOs of **A6** *trans*

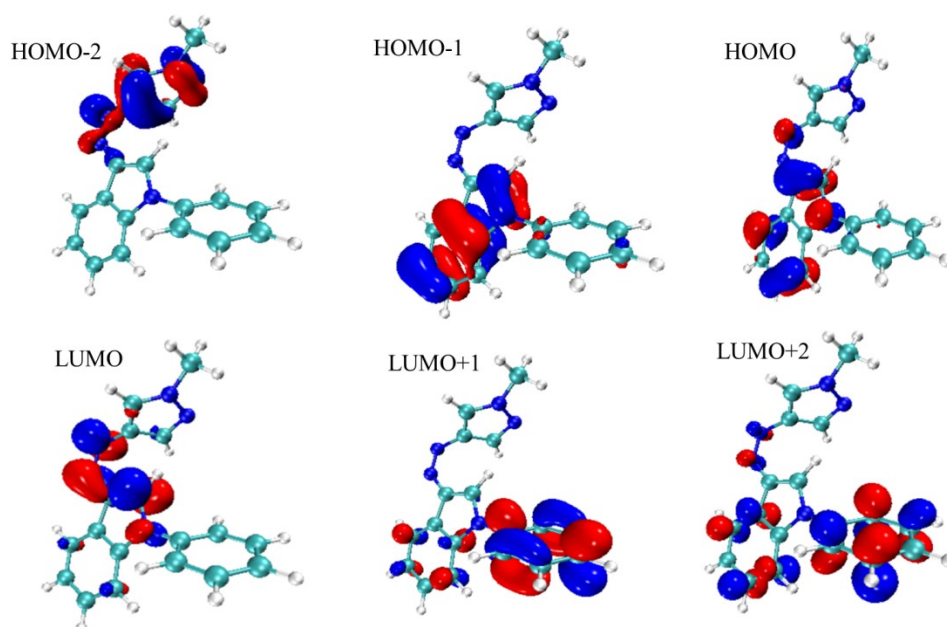

Frontier MOs of **A6** *cis*

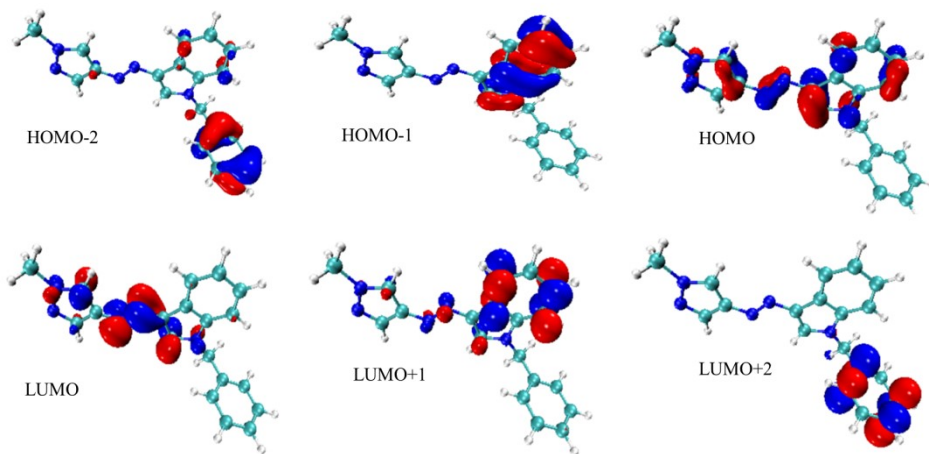

Frontier MOs of **A7 trans**

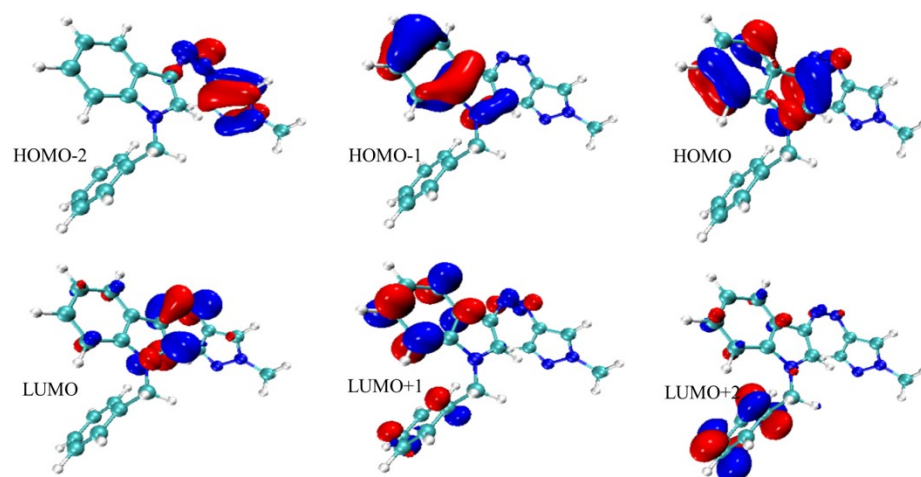

Frontier MOs of **A7 cis**

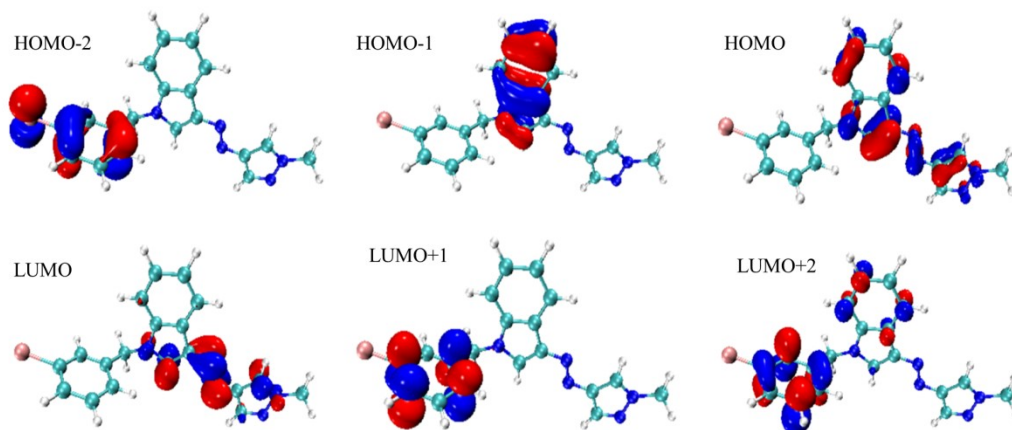

Frontier MOs of **A8 trans**

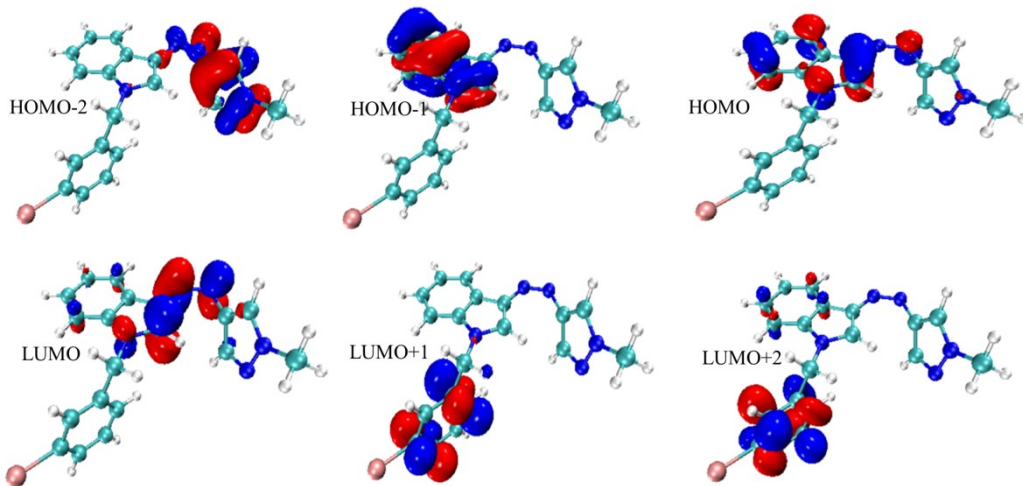

Frontier MOs of **A8 cis**

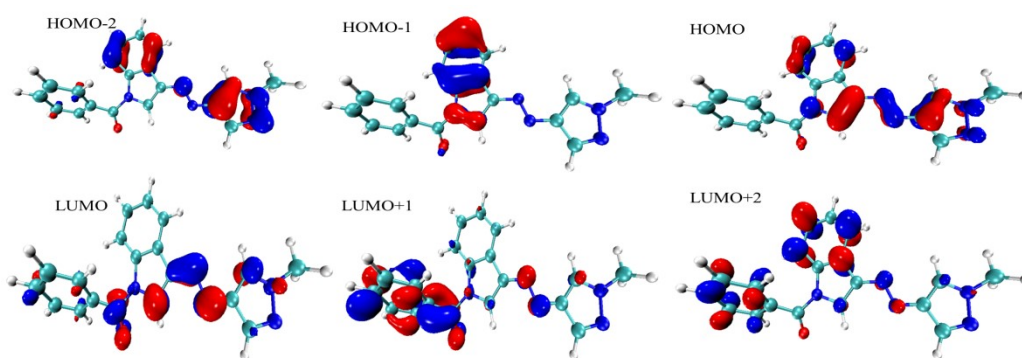

Frontier MOs of **A9 trans**

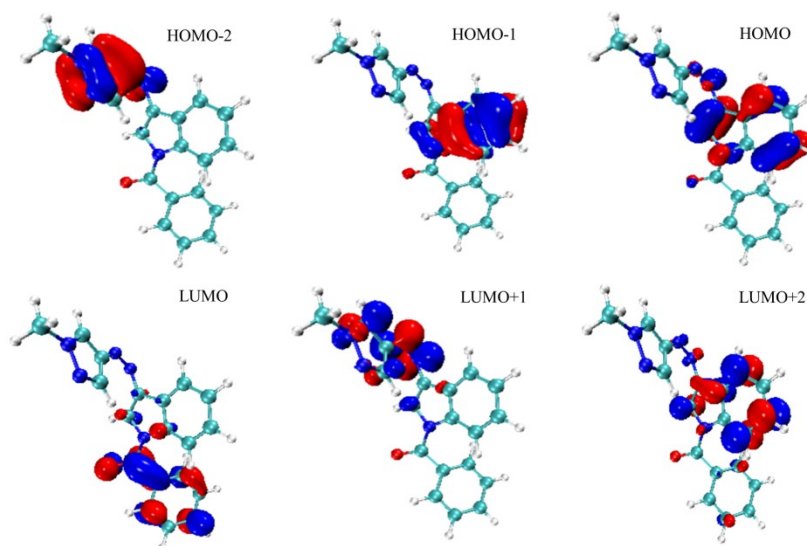

Frontier MOs of **A9 cis**



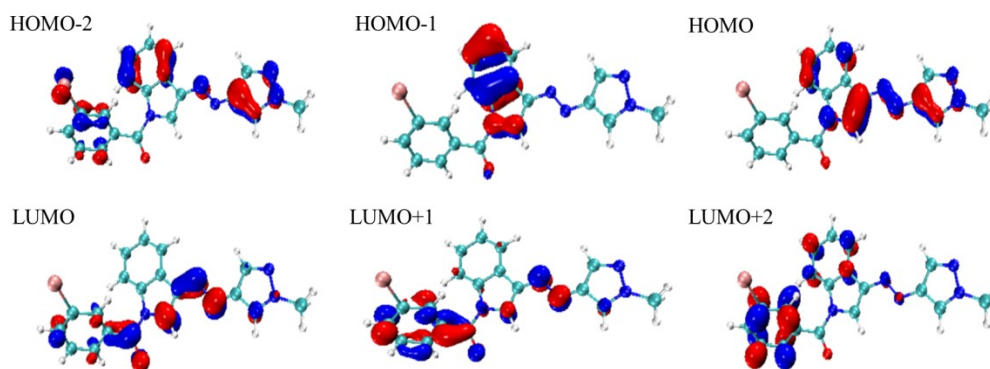

Frontier MOs of **A10** *trans*

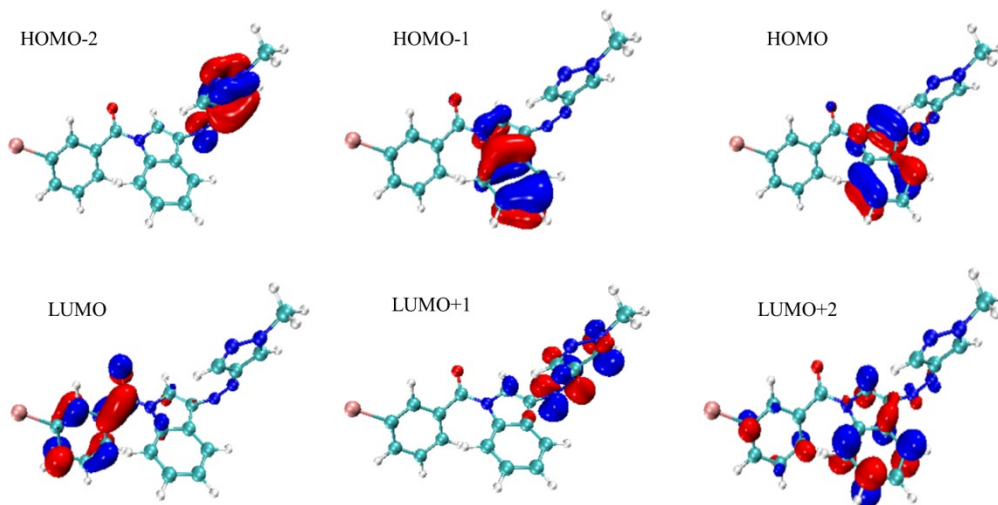

Frontier MOs of **A10** *cis*

Table S7. The energy (eV) of Frontier MOs (**A11**—**B4**).

| Compd. | <b>B1</b> | <b>A11</b>   |            | <b>B2</b>    |            | <b>B3</b>    |            | <b>B4</b>    |            |
|--------|-----------|--------------|------------|--------------|------------|--------------|------------|--------------|------------|
|        |           | <i>trans</i> | <i>cis</i> | <i>trans</i> | <i>cis</i> | <i>trans</i> | <i>cis</i> | <i>trans</i> | <i>cis</i> |
| HOMO-2 | -9.247    | -9.580       | -9.4754    | -9.232       | -8.826     | -9.240       | -8.826     | -9.223       | -8.864     |
| HOMO-1 | -8.677    | -9.200       | -9.2220    | -8.615       | -8.734     | -8.593       | -8.689     | -8.641       | -8.770     |
| HOMO   | -7.515    | -8.119       | -8.5843    | -7.418       | -8.046     | -7.424       | -8.043     | -7.504       | -8.137     |
| LUMO   | 2.199     | 1.754        | 2.2792     | 2.211        | 2.326      | 2.187        | 2.296      | 2.156        | 2.176      |
| LUMO+1 | 3.571     | 2.398        | 2.5174     | 3.571        | 3.624      | 3.556        | 3.624      | 3.484        | 3.434      |
| LUMO+2 | 4.597     | 3.176        | 2.9029     | 4.541        | 4.474      | 4.557        | 4.500      | 3.518        | 3.500      |

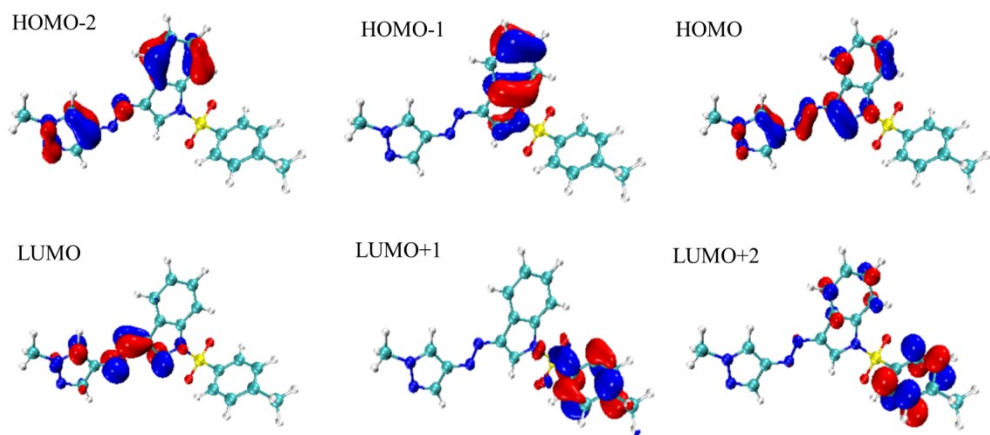

Frontier MOs of **A11 trans**

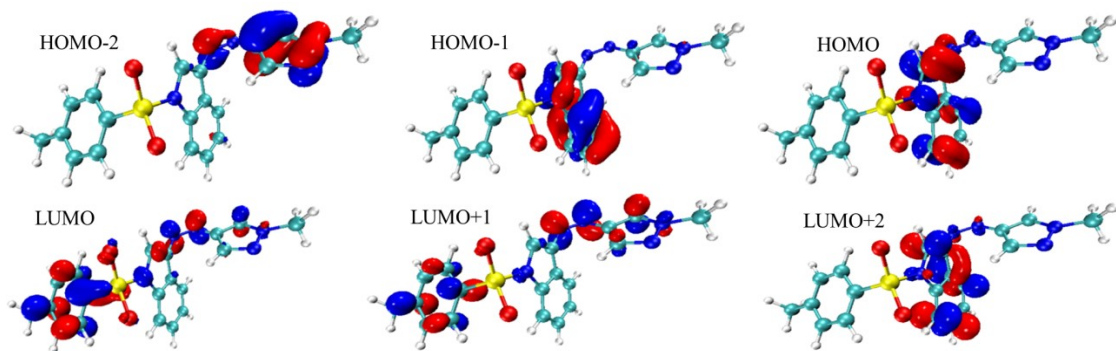

Frontier MOs of **A11 cis**

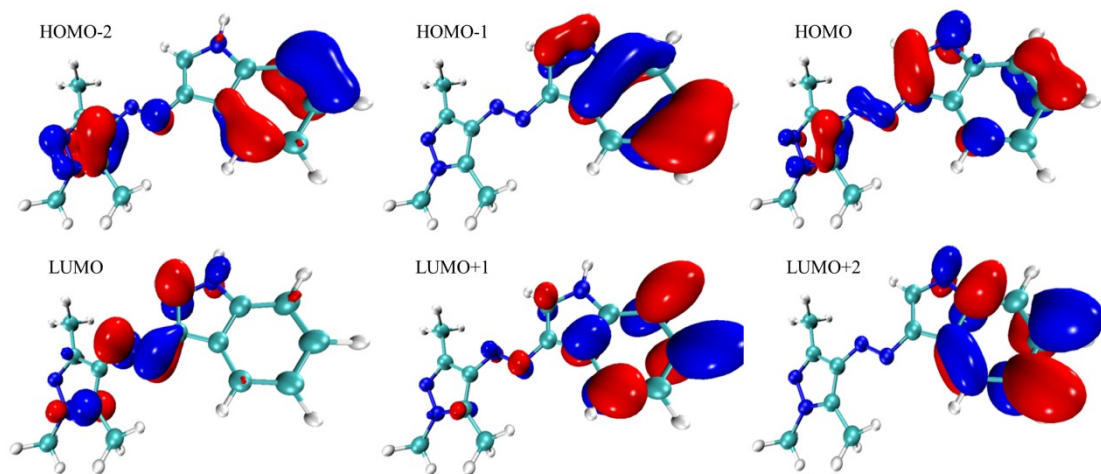

Frontier MOs of **B1 trans**

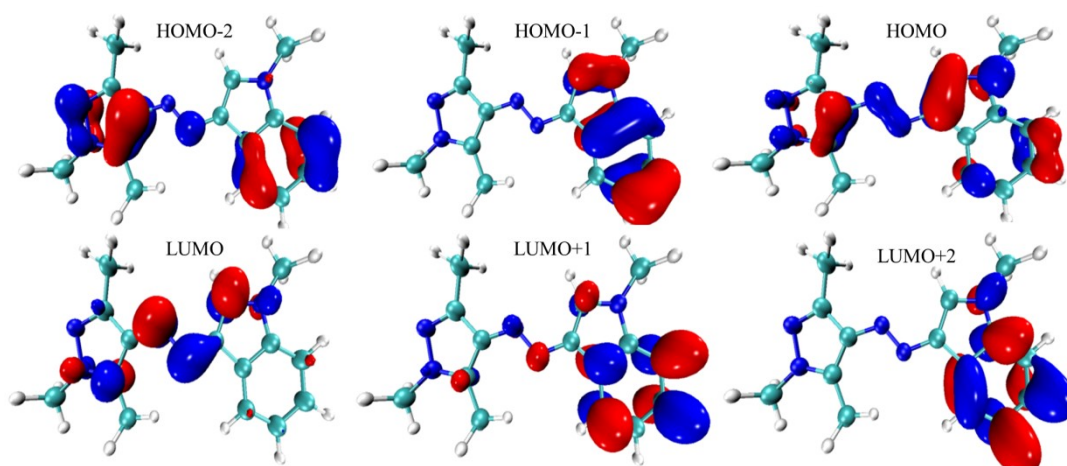

Frontier MOs of **B2 trans**

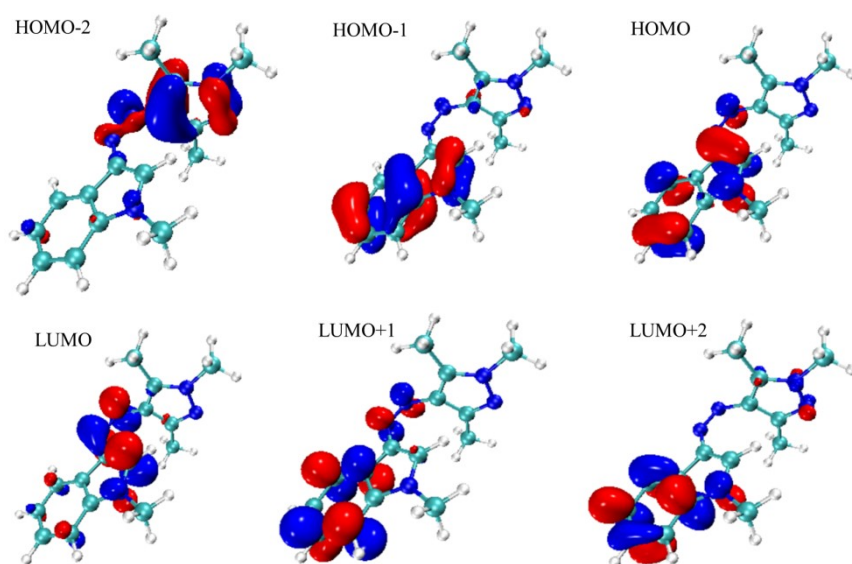

Frontier MOs of **B2 cis**

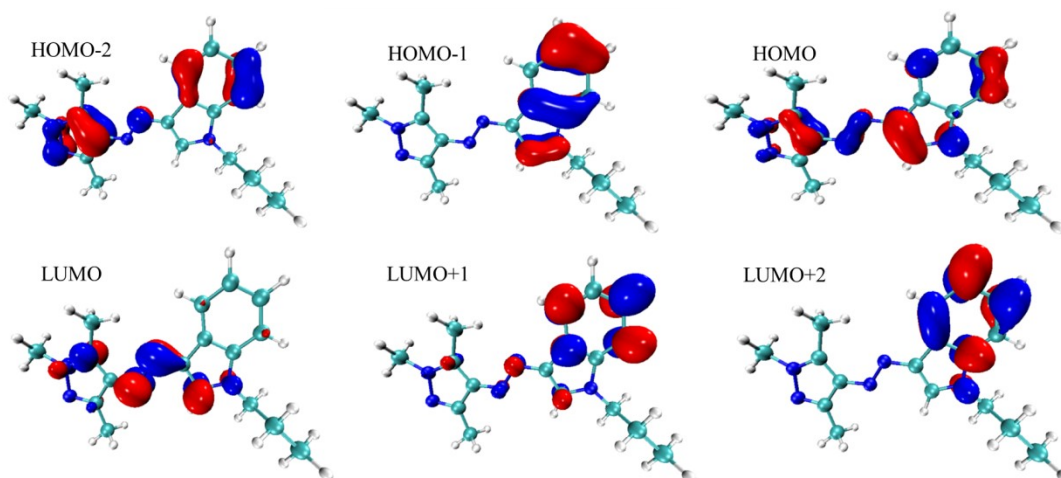

Frontier MOs of **B3 trans**



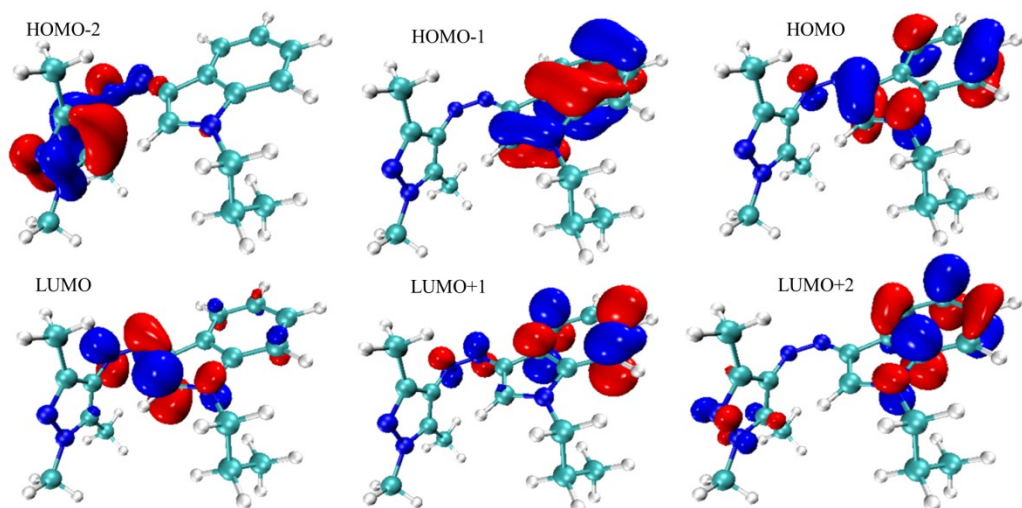

Frontier MOs of **B3 cis**

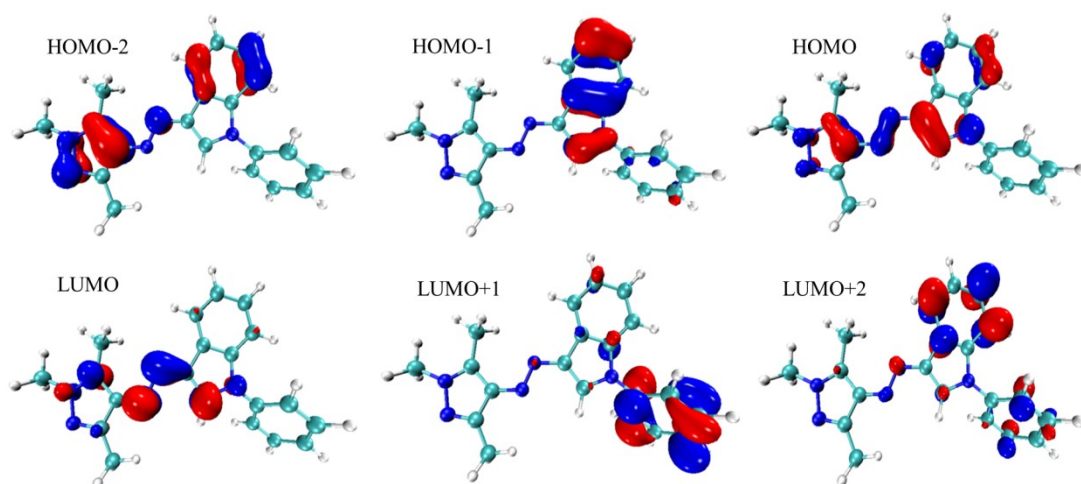

Frontier MOs of **B4 trans**

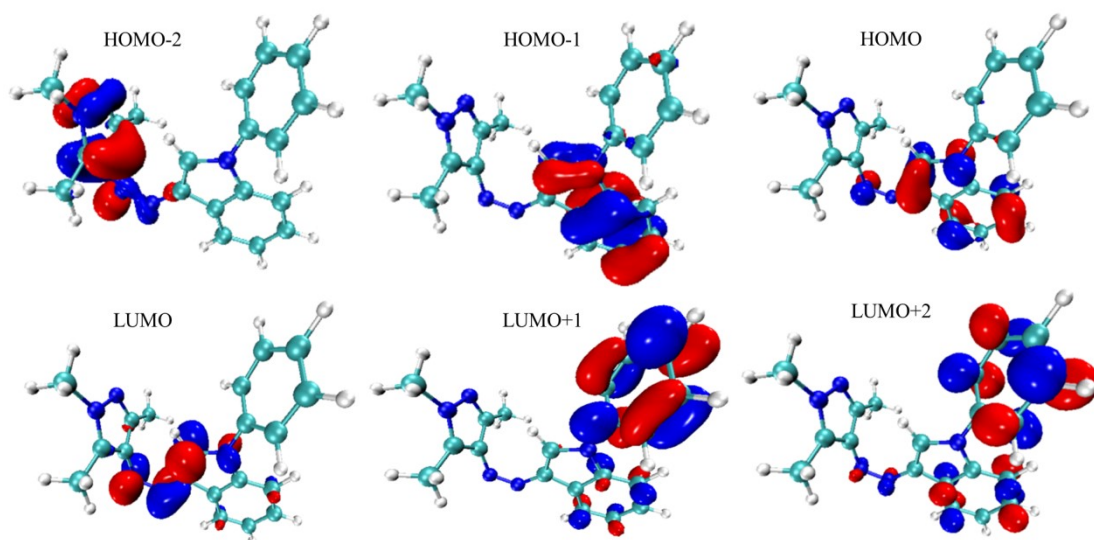

Frontier MOs of **B4 cis**



Table S8. The energy (eV) of Frontier MOs (**B5**—**B7**).

| Compd. | <b>B5</b>    |            | <b>B6</b>    |            | <b>B7</b>    |            |
|--------|--------------|------------|--------------|------------|--------------|------------|
|        | <i>trans</i> | <i>cis</i> | <i>trans</i> | <i>cis</i> | <i>trans</i> | <i>cis</i> |
| HOMO-2 | -9.250       | -8.852     | -9.354       | -9.106     | -9.452       | -9.293     |
| HOMO-1 | -8.664       | -8.771     | -8.999       | -8.972     | -9.162       | -9.002     |
| HOMO   | -7.482       | -8.091     | -7.873       | -8.537     | -7.999       | -8.662     |
| LUMO   | 2.152        | 2.270      | 1.717        | 1.705      | 1.787        | 1.882      |
| LUMO+1 | 3.537        | 3.568      | 2.418        | 2.462      | 2.344        | 2.354      |
| LUMO+2 | 3.712        | 3.672      | 3.276        | 3.490      | 3.176        | 3.180      |

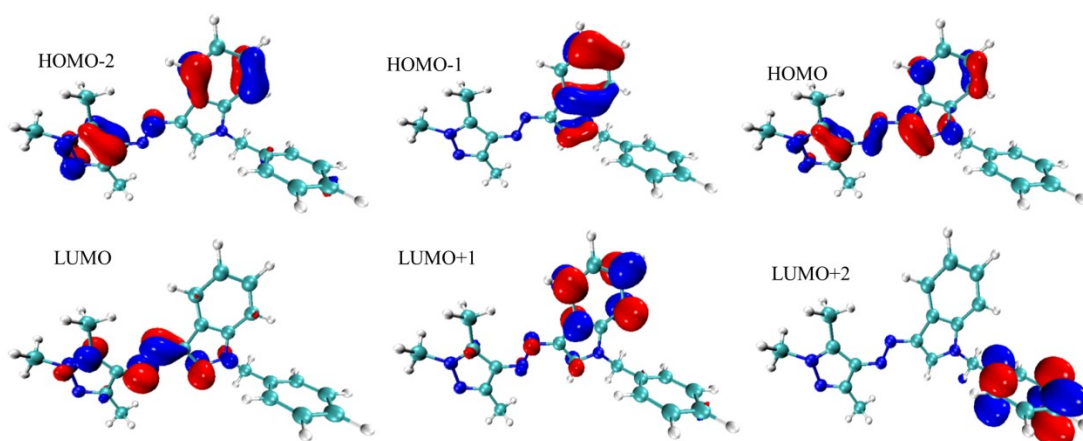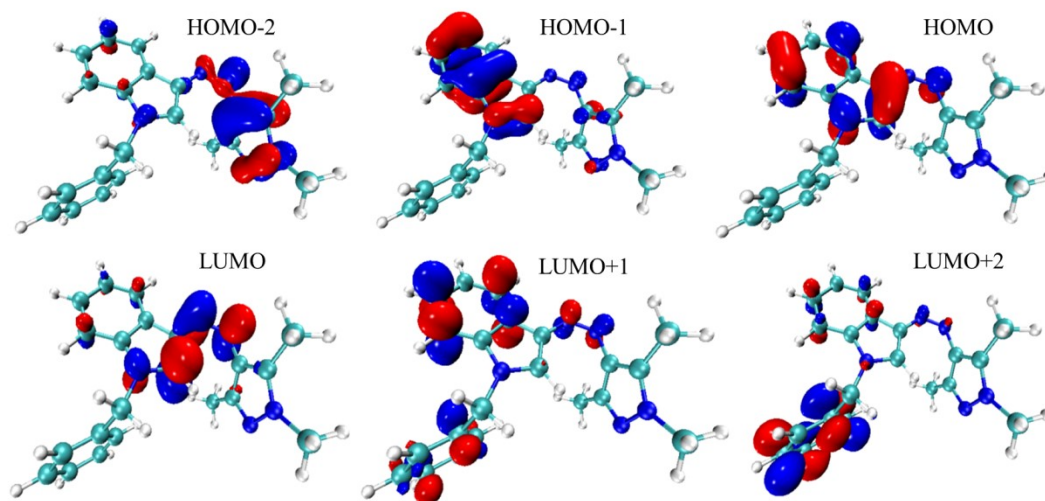

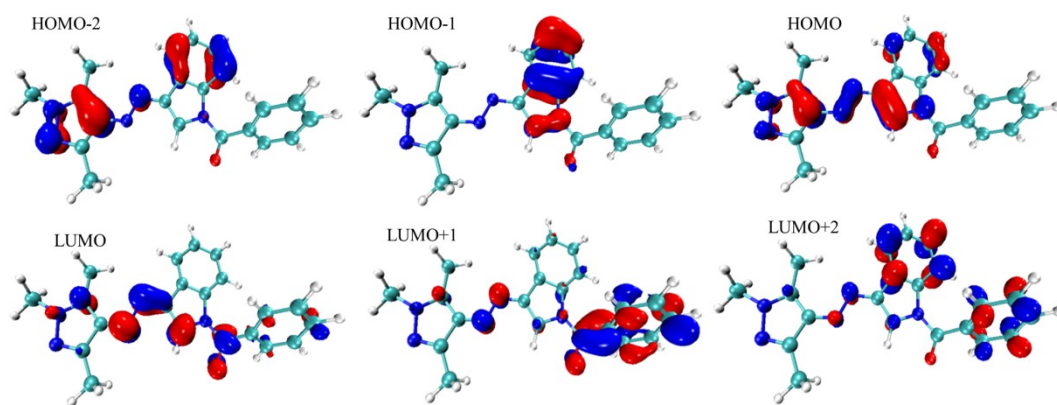

Frontier MOs of **B6 trans**

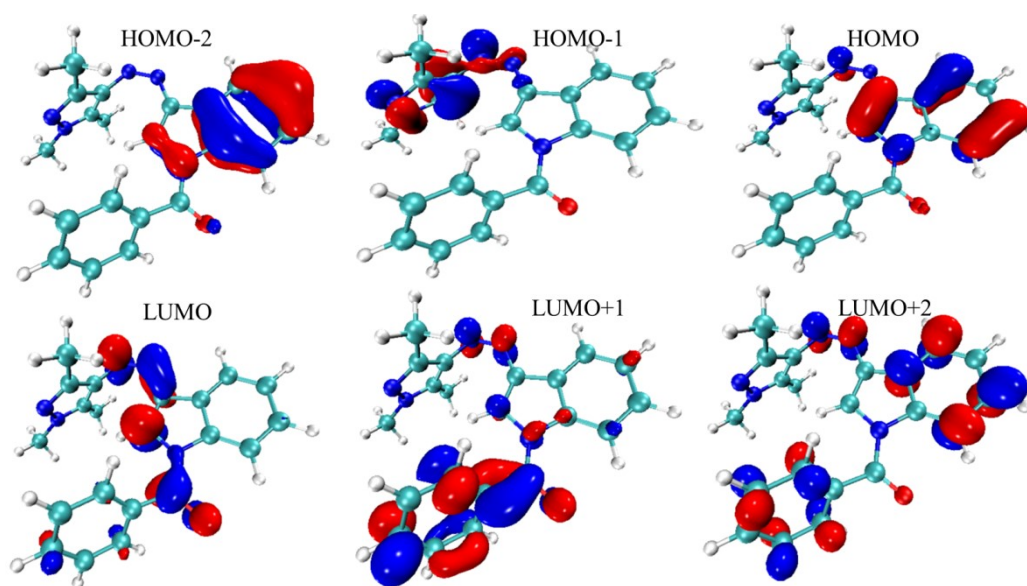

Frontier MOs of **B6 cis**

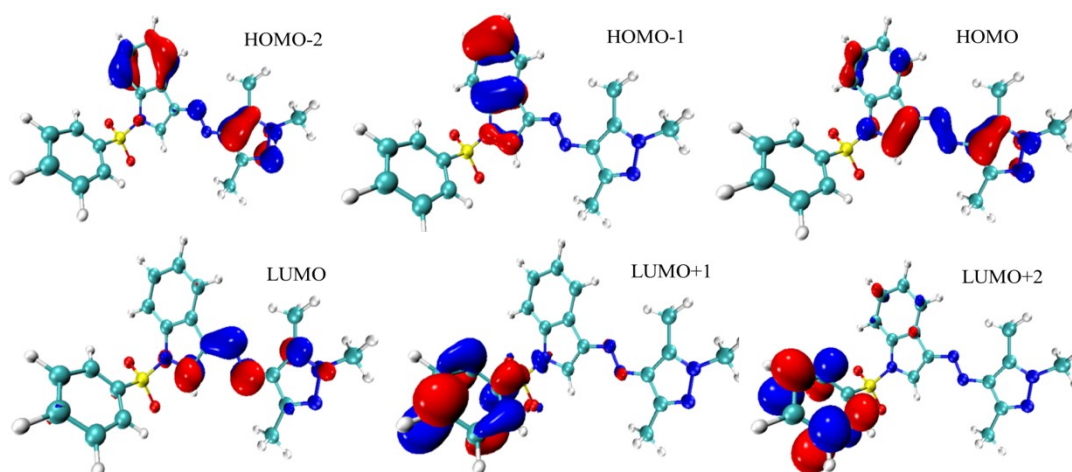

Frontier MOs of **B7 trans**

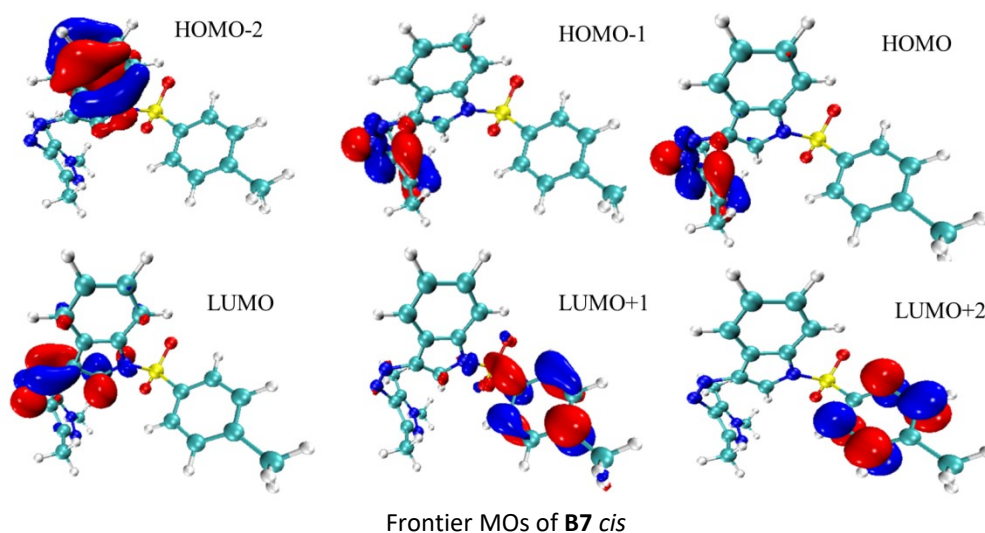

#### calculations of transition state

Table S9. The energy (Hartree) TS-1, TS-2, and *cis*-isomer by Gauss calculations (**A9**, **A11**, and **B7**).

| Compd. | TS-1       | TS-2       | <i>Cis</i> -isomer |
|--------|------------|------------|--------------------|
| A9     | -1540.1519 | -1540.1105 | -1540.1981         |
| A11    | -1069.1888 | -1069.1456 | -1069.2353         |
| B7     | -1578.9520 | -1578.3637 | -1617.8487         |

#### 4.4 XYZ coordinates optimized molecular geometry of title compounds

Table S10. XYZ coordinates optimized molecular geometry of **A1**.

|   |         |          |          |
|---|---------|----------|----------|
| C | 2.44815 | 0.03523  | -0.94145 |
| C | 3.36786 | 1.03629  | -1.08284 |
| C | 2.94823 | 2.17394  | -0.16807 |
| C | 1.78617 | 1.79081  | 0.42332  |
| N | 1.51649 | 0.34583  | 0.16657  |
| H | 0.5609  | 0.15639  | -0.05919 |
| H | 1.14985 | 2.43754  | 0.99053  |
| C | 3.51968 | -1.20032 | -2.69996 |
| C | 4.52248 | -0.19749 | -2.7772  |
| C | 4.44622 | 0.94556  | -1.95554 |
| C | 2.46412 | -1.08406 | -1.76949 |
| H | 3.56611 | -2.05019 | -3.34839 |
| H | 5.33599 | -0.30807 | -3.46341 |
| H | 5.18607 | 1.71686  | -2.00664 |
| H | 1.70517 | -1.83495 | -1.69827 |
| N | 3.64902 | 3.45238  | 0.02009  |

|   |         |         |          |
|---|---------|---------|----------|
| N | 4.23634 | 4.52383 | 0.17779  |
| C | 5.48425 | 4.79222 | -0.5513  |
| C | 6.10705 | 3.98139 | -1.40479 |
| C | 6.33882 | 6.04218 | -0.47305 |
| H | 5.8575  | 2.95651 | -1.58437 |
| H | 6.12791 | 6.90463 | 0.12411  |
| N | 7.37832 | 5.88834 | -1.24283 |
| N | 7.20686 | 4.72707 | -2.05671 |
| C | 8.43276 | 3.92203 | -2.15663 |
| H | 8.2426  | 3.0554  | -2.75469 |
| H | 9.20665 | 4.50549 | -2.61004 |
| H | 8.74137 | 3.61923 | -1.17787 |

|                                              |                             |
|----------------------------------------------|-----------------------------|
| Zero-point correction=                       | 0.236939 (Hartree/Particle) |
| Thermal correction to Energy=                | 0.249475                    |
| Thermal correction to Enthalpy=              | 0.250419                    |
| Thermal correction to Gibbs Free Energy=     | 0.195632                    |
| Sum of electronic and zero-point Energies=   | -728.648173                 |
| Sum of electronic and thermal Energies=      | -728.635638                 |
| Sum of electronic and thermal Enthalpies=    | -728.634694                 |
| Sum of electronic and thermal Free Energies= | -728.689481                 |

Table S11. XYZ coordinates optimized molecular geometry of **A2-trans**.

|   |          |          |          |
|---|----------|----------|----------|
| C | -3.12979 | 0.29402  | 0.00005  |
| C | -2.01985 | -0.56163 | -0.00007 |
| C | -0.8516  | 0.28285  | -0.00014 |
| C | -1.29538 | 1.57226  | -0.00008 |
| N | -2.663   | 1.59433  | 0.00004  |
| H | -0.72888 | 2.47336  | -0.00011 |
| C | -4.5931  | -1.56888 | 0.00012  |
| C | -3.48881 | -2.43474 | 0.00001  |
| C | -2.20417 | -1.9419  | -0.00009 |
| C | -4.42917 | -0.20236 | 0.00015  |
| H | -5.58281 | -1.98059 | 0.0002   |
| H | -3.65464 | -3.49372 | -0.00001 |
| H | -1.35802 | -2.59939 | -0.00018 |
| H | -5.27548 | 0.45392  | 0.00024  |
| N | 0.45026  | -0.21538 | -0.00026 |
| N | 1.37388  | 0.62608  | -0.0003  |
| C | 2.66807  | 0.10692  | -0.00012 |
| C | 3.81209  | 0.86574  | -0.00015 |
| C | 3.12111  | -1.23635 | 0.00006  |

|   |          |          |          |
|---|----------|----------|----------|
| H | 3.92815  | 1.92365  | -0.00029 |
| H | 2.52509  | -2.11707 | 0.00011  |
| N | 4.85487  | 0.02268  | 0.00006  |
| C | -3.50188 | 2.79366  | 0.00013  |
| H | -4.12725 | 2.81361  | 0.88247  |
| H | -2.86449 | 3.66437  | 0.00007  |
| H | -4.12744 | 2.81362  | -0.88207 |
| N | 4.43197  | -1.29566 | 0.00024  |
| C | 5.90062  | -1.35876 | 0.00047  |
| H | 6.27848  | -0.86998 | 0.87409  |
| H | 6.21365  | -2.38195 | 0.00069  |
| H | 6.27873  | -0.87029 | -0.87322 |

|                                              |                             |
|----------------------------------------------|-----------------------------|
| Zero-point correction=                       | 0.266727 (Hartree/Particle) |
| Thermal correction to Energy=                | 0.280943                    |
| Thermal correction to Enthalpy=              | 0.281887                    |
| Thermal correction to Gibbs Free Energy=     | 0.223483                    |
| Sum of electronic and zero-point Energies=   | -767.432402                 |
| Sum of electronic and thermal Energies=      | -767.418186                 |
| Sum of electronic and thermal Enthalpies=    | -767.417242                 |
| Sum of electronic and thermal Free Energies= | -767.475646                 |

Table S12. XYZ coordinates optimized molecular geometry of **A2-cis**.

|   |             |             |             |
|---|-------------|-------------|-------------|
| C | 2.35418000  | 0.74548300  | 0.00739300  |
| C | 2.01413300  | -0.60836800 | 0.05598700  |
| C | 0.56993400  | -0.68137900 | 0.01938400  |
| C | 0.12083300  | 0.61617600  | -0.04721400 |
| N | 1.17706000  | 1.47195600  | -0.05364300 |
| H | -0.86885200 | 0.99572900  | -0.09281300 |
| C | 4.65507300  | 0.19859500  | 0.09370400  |
| C | 4.32524400  | -1.16404300 | 0.14436600  |
| C | 3.01223200  | -1.57577800 | 0.12646000  |
| C | 3.67883200  | 1.16678700  | 0.02495400  |
| H | 5.68635700  | 0.49023700  | 0.10886200  |
| H | 5.11169600  | -1.89039300 | 0.19789500  |
| H | 2.75311000  | -2.61424400 | 0.16522800  |
| H | 3.93431500  | 2.20604000  | -0.01313300 |
| N | -0.04470200 | -1.93259700 | 0.08207700  |
| N | -1.26365900 | -2.19072800 | 0.05027400  |
| C | -2.23423500 | -1.15161300 | -0.11466300 |
| C | -3.04027200 | -0.60871000 | 0.84631300  |
| C | -2.63730700 | -0.53826100 | -1.32374000 |
| H | -3.08194600 | -0.79075600 | 1.89391800  |

|   |             |             |             |
|---|-------------|-------------|-------------|
| H | -2.24750700 | -0.70978100 | -2.29964400 |
| N | -3.60754000 | 0.32762200  | -1.11528400 |
| N | -3.85001900 | 0.28310600  | 0.23448200  |
| C | -4.89622300 | 1.12228800  | 0.81333200  |
| H | -4.91533400 | 0.96575900  | 1.88038600  |
| H | -4.68420100 | 2.15955600  | 0.60269900  |
| H | -5.85278100 | 0.85392800  | 0.39038900  |
| C | 1.09245600  | 2.93355600  | -0.11664800 |
| H | 1.59235400  | 3.29710200  | -1.00382100 |
| H | 0.05351200  | 3.22265400  | -0.15235200 |
| H | 1.55202300  | 3.37025600  | 0.75927000  |

|                                              |                             |
|----------------------------------------------|-----------------------------|
| Zero-point correction=                       | 0.266267 (Hartree/Particle) |
| Thermal correction to Energy=                | 0.280552                    |
| Thermal correction to Enthalpy=              | 0.281496                    |
| Thermal correction to Gibbs Free Energy=     | 0.222143                    |
| Sum of electronic and zero-point Energies=   | -767.407399                 |
| Sum of electronic and thermal Energies=      | -767.393114                 |
| Sum of electronic and thermal Enthalpies=    | -767.392170                 |
| Sum of electronic and thermal Free Energies= | -767.451523                 |

Table S13. XYZ coordinates optimized molecular geometry of **A3-trans**.

|   |          |          |          |
|---|----------|----------|----------|
| C | 2.89046  | 0.12334  | -0.17818 |
| C | 1.72244  | 0.88697  | -0.04594 |
| C | 0.61793  | -0.03589 | -0.11833 |
| C | 1.15126  | -1.27895 | -0.28704 |
| N | 2.51687  | -1.20037 | -0.3279  |
| H | 0.64898  | -2.21255 | -0.38439 |
| C | 4.21081  | 2.08393  | 0.00334  |
| C | 3.04692  | 2.85659  | 0.13616  |
| C | 1.80388  | 2.26831  | 0.11226  |
| C | 4.14851  | 0.71831  | -0.154   |
| H | 5.16717  | 2.56767  | 0.02549  |
| H | 3.13424  | 3.918    | 0.25751  |
| H | 0.91132  | 2.85286  | 0.2121   |
| H | 5.04241  | 0.13709  | -0.25292 |
| N | -0.71505 | 0.36141  | -0.0276  |
| N | -1.57671 | -0.53928 | -0.11409 |
| C | -2.9032  | -0.1198  | -0.02121 |
| C | -3.99181 | -0.95279 | -0.09829 |
| C | -3.44704 | 1.17639  | 0.16156  |
| H | -4.03521 | -2.00758 | -0.23348 |

|   |          |          |          |
|---|----------|----------|----------|
| H | -2.913   | 2.09025  | 0.26445  |
| N | -5.08944 | -0.19333 | 0.03024  |
| C | 3.42823  | -2.34567 | -0.44906 |
| H | 2.89486  | -3.13619 | -0.95676 |
| H | 4.26085  | -2.05153 | -1.07218 |
| C | 3.92138  | -2.82862 | 0.92382  |
| H | 4.59118  | -3.67112 | 0.79816  |
| H | 4.45278  | -2.03817 | 1.43879  |
| H | 3.08252  | -3.13862 | 1.53449  |
| N | -4.75837 | 1.14094  | 0.19402  |
| C | -6.22729 | 1.09782  | 0.23028  |
| H | -6.54594 | 0.47489  | 1.0398   |
| H | -6.60982 | 2.08733  | 0.36971  |
| H | -6.59531 | 0.69986  | -0.69226 |

|                                              |                             |
|----------------------------------------------|-----------------------------|
| Zero-point correction=                       | 0.297140 (Hartree/Particle) |
| Thermal correction to Energy=                | 0.312575                    |
| Thermal correction to Enthalpy=              | 0.313519                    |
| Thermal correction to Gibbs Free Energy=     | 0.251917                    |
| Sum of electronic and zero-point Energies=   | -806.223575                 |
| Sum of electronic and thermal Energies=      | -806.208140                 |
| Sum of electronic and thermal Enthalpies=    | -806.207196                 |
| Sum of electronic and thermal Free Energies= | -806.268798                 |

Table S14. XYZ coordinates optimized molecular geometry of **A3-cis**.

|   |             |             |             |
|---|-------------|-------------|-------------|
| C | -2.29852900 | 0.41301500  | -0.22795200 |
| C | -1.90064500 | -0.91366000 | -0.04464700 |
| C | -0.45609700 | -0.91581700 | 0.02477500  |
| C | -0.06232900 | 0.39257000  | -0.12054900 |
| N | -1.15244800 | 1.19150700  | -0.27452200 |
| H | 0.90999100  | 0.81764600  | -0.12720200 |
| C | -4.57150100 | -0.25136100 | -0.26257600 |
| C | -4.18193800 | -1.58656600 | -0.07933600 |
| C | -2.85316400 | -1.92590800 | 0.02960300  |
| C | -3.64103000 | 0.75993700  | -0.33882800 |
| H | -5.61371100 | -0.01478600 | -0.34441800 |
| H | -4.93427400 | -2.34808000 | -0.02462800 |
| H | -2.54674700 | -2.94278200 | 0.16812100  |
| H | -3.94651500 | 1.77665900  | -0.47788700 |
| N | 0.20990500  | -2.13231600 | 0.18130200  |
| N | 1.43755300  | -2.32845800 | 0.26873600  |
| C | 2.36230600  | -1.23567000 | 0.26082200  |
| C | 3.15263500  | -0.82474900 | -0.77569200 |



|   |             |             |             |
|---|-------------|-------------|-------------|
| C | 2.72866100  | -0.41396500 | 1.35213700  |
| H | 3.21090300  | -1.17526900 | -1.77872100 |
| H | 2.33822300  | -0.43841500 | 2.34243900  |
| N | 3.66300500  | 0.44680700  | 1.00444200  |
| N | 3.91853000  | 0.19011000  | -0.31893600 |
| C | 4.93332600  | 0.96531900  | -1.02812400 |
| H | 4.96169200  | 0.63973700  | -2.05612100 |
| H | 4.68009300  | 2.01380700  | -0.98657600 |
| H | 5.89836700  | 0.80623700  | -0.57058000 |
| C | -1.11255300 | 2.65581000  | -0.40811600 |
| H | -0.15103300 | 2.92030900  | -0.82318600 |
| H | -1.87444900 | 2.94985500  | -1.11554900 |
| C | -1.32379500 | 3.35416700  | 0.94375600  |
| H | -1.29347500 | 4.42883800  | 0.80912000  |
| H | -2.28303900 | 3.08579200  | 1.36797700  |
| H | -0.54391200 | 3.06816600  | 1.63841700  |

|                                              |                             |
|----------------------------------------------|-----------------------------|
| Zero-point correction=                       | 0.296848 (Hartree/Particle) |
| Thermal correction to Energy=                | 0.312301                    |
| Thermal correction to Enthalpy=              | 0.313245                    |
| Thermal correction to Gibbs Free Energy=     | 0.251034                    |
| Sum of electronic and zero-point Energies=   | -806.198379                 |
| Sum of electronic and thermal Energies=      | -806.182926                 |
| Sum of electronic and thermal Enthalpies=    | -806.181982                 |
| Sum of electronic and thermal Free Energies= | -806.244192                 |

Table S15. XYZ coordinates optimized molecular geometry of **A4-trans**.

|   |          |          |          |
|---|----------|----------|----------|
| C | 2.46616  | 0.75394  | -0.2294  |
| C | 1.16712  | 1.25134  | -0.06891 |
| C | 0.2766   | 0.1242   | -0.17766 |
| C | 1.04929  | -0.9721  | -0.39374 |
| N | 2.37449  | -0.61241 | -0.43093 |
| H | 0.74237  | -1.9823  | -0.52849 |
| C | 3.34933  | 2.93696  | 0.03049  |
| C | 2.05261  | 3.44339  | 0.19174  |
| C | 0.96061  | 2.60989  | 0.14321  |
| C | 3.57155  | 1.59607  | -0.17979 |
| H | 4.18396  | 3.60841  | 0.07279  |
| H | 1.91763  | 4.49408  | 0.35467  |
| H | -0.03473 | 2.98642  | 0.26449  |
| H | 4.56686  | 1.21888  | -0.29946 |
| N | -1.11012 | 0.22836  | -0.07306 |
| N | -1.75497 | -0.83485 | -0.18883 |

|   |          |          |          |
|---|----------|----------|----------|
| C | -3.14083 | -0.71957 | -0.08266 |
| C | -3.92619 | 0.3854   | 0.1303   |
| C | -4.05075 | -1.798   | -0.18265 |
| H | -3.64299 | 1.40155  | 0.26134  |
| H | -3.81454 | -2.82216 | -0.34853 |
| N | -5.29181 | -1.39719 | -0.04381 |
| N | -5.2026  | -0.03098 | 0.15126  |
| C | -6.4241  | 0.73506  | 0.34266  |
| H | -6.1684  | 1.77547  | 0.47866  |
| H | -7.05835 | 0.62652  | -0.5247  |
| H | -6.94579 | 0.37137  | 1.21556  |
| C | 3.49602  | -1.53438 | -0.59519 |
| H | 3.14047  | -2.39781 | -1.14266 |
| H | 4.2531   | -1.05052 | -1.1991  |
| C | 4.09214  | -1.97621 | 0.75312  |
| H | 4.41348  | -1.09984 | 1.30322  |
| H | 3.31629  | -2.45919 | 1.33571  |
| C | 5.27754  | -2.93729 | 0.54637  |
| H | 6.06797  | -2.45922 | -0.02291 |
| H | 5.69052  | -3.24686 | 1.49891  |
| H | 4.96464  | -3.82756 | 0.01074  |

|                                              |                             |
|----------------------------------------------|-----------------------------|
| Zero-point correction=                       | 0.327614 (Hartree/Particle) |
| Thermal correction to Energy=                | 0.344386                    |
| Thermal correction to Enthalpy=              | 0.345330                    |
| Thermal correction to Gibbs Free Energy=     | 0.280261                    |
| Sum of electronic and zero-point Energies=   | -845.012827                 |
| Sum of electronic and thermal Energies=      | -844.996055                 |
| Sum of electronic and thermal Enthalpies=    | -844.995110                 |
| Sum of electronic and thermal Free Energies= | -845.060180                 |

Table S16. XYZ coordinates optimized molecular geometry of **A4-cis**.

|   |             |             |             |
|---|-------------|-------------|-------------|
| C | 2.24247900  | -0.05463400 | 0.20748500  |
| C | 1.74445400  | -1.32790800 | -0.07947900 |
| C | 0.30164400  | -1.22919000 | -0.07096400 |
| C | 0.00759300  | 0.08157700  | 0.21723100  |
| N | 1.15714800  | 0.78953600  | 0.38611600  |
| H | -0.93129600 | 0.56506600  | 0.32155800  |
| C | 4.46239700  | -0.86577400 | 0.05705600  |
| C | 3.97208400  | -2.14784800 | -0.23292600 |
| C | 2.61916900  | -2.38741800 | -0.30284600 |
| C | 3.60965000  | 0.19155000  | 0.27899700  |
| H | 5.52129500  | -0.70696600 | 0.10552600  |

|   |             |             |             |
|---|-------------|-------------|-------------|
| H | 4.66584300  | -2.94734700 | -0.40140700 |
| H | 2.23610100  | -3.36308700 | -0.52303300 |
| H | 3.99147700  | 1.16778500  | 0.49714500  |
| N | -0.45363900 | -2.36803700 | -0.35481300 |
| N | -1.69469000 | -2.47941100 | -0.37744500 |
| C | -2.54226200 | -1.37621100 | -0.04046700 |
| C | -3.25820500 | -0.58851700 | -0.89763700 |
| C | -2.90124100 | -0.93349600 | 1.25408000  |
| H | -3.29558400 | -0.58476700 | -1.96111200 |
| H | -2.55708800 | -1.31205200 | 2.18791000  |
| N | -3.76122300 | 0.06212200  | 1.19279500  |
| N | -3.97518200 | 0.27501200  | -0.14571400 |
| C | -4.90308600 | 1.31735200  | -0.57735000 |
| H | -4.91935900 | 1.34181500  | -1.65560200 |
| H | -5.89278600 | 1.09941200  | -0.20472300 |
| H | -4.57444800 | 2.27297100  | -0.19774000 |
| C | 1.22653400  | 2.23120300  | 0.66553600  |
| H | 0.30785800  | 2.51601300  | 1.15904200  |
| H | 2.04348100  | 2.40329700  | 1.35278500  |
| C | 1.41799000  | 3.05860200  | -0.61637400 |
| H | 2.32272800  | 2.73734800  | -1.11863200 |
| H | 0.58436300  | 2.86939800  | -1.28257900 |
| C | 1.50344100  | 4.56101900  | -0.28894700 |
| H | 2.34376300  | 4.76424900  | 0.36619500  |
| H | 1.63327000  | 5.14095300  | -1.19489400 |
| H | 0.59763700  | 4.89950400  | 0.20261100  |

|                                              |                             |
|----------------------------------------------|-----------------------------|
| Zero-point correction=                       | 0.327276 (Hartree/Particle) |
| Thermal correction to Energy=                | 0.344063                    |
| Thermal correction to Enthalpy=              | 0.345007                    |
| Thermal correction to Gibbs Free Energy=     | 0.279312                    |
| Sum of electronic and zero-point Energies=   | -844.987653                 |
| Sum of electronic and thermal Energies=      | -844.970866                 |
| Sum of electronic and thermal Enthalpies=    | -844.969922                 |
| Sum of electronic and thermal Free Energies= | -845.035617                 |

Table S17. XYZ coordinates optimized molecular geometry of **A5-trans**.

|   |          |          |          |
|---|----------|----------|----------|
| C | -2.74107 | -0.55028 | -0.21817 |
| C | -1.52371 | -1.21982 | -0.03005 |
| C | -0.48438 | -0.22912 | -0.15702 |
| C | -1.09854 | 0.96002  | -0.40798 |
| N | -2.45605 | 0.78357  | -0.45432 |
| H | -0.66173 | 1.91889  | -0.55916 |

|   |          |          |          |
|---|----------|----------|----------|
| C | -3.92098 | -2.58292 | 0.09554  |
| C | -2.70716 | -3.26131 | 0.28258  |
| C | -1.50874 | -2.58934 | 0.22157  |
| C | -3.95401 | -1.23008 | -0.15417 |
| H | -4.84145 | -3.12961 | 0.14971  |
| H | -2.72064 | -4.31553 | 0.47574  |
| H | -0.57779 | -3.10056 | 0.36394  |
| H | -4.88734 | -0.72367 | -0.29127 |
| N | 0.87223  | -0.52773 | -0.03261 |
| N | 1.66996  | 0.4241   | -0.16828 |
| C | 3.02124  | 0.10638  | -0.04066 |
| C | 4.04868  | 1.00995  | -0.15548 |
| C | 3.65364  | -1.13493 | 0.22104  |
| H | 4.01811  | 2.05589  | -0.35032 |
| H | 3.18507  | -2.0776  | 0.37164  |
| N | 5.1956   | 0.34018  | 0.02681  |
| C | -3.4283  | 1.86541  | -0.66285 |
| H | -3.05786 | 2.5159   | -1.44284 |
| H | -4.34738 | 1.4159   | -1.01156 |
| C | -3.66626 | 2.64019  | 0.61104  |
| H | -3.97154 | 2.05396  | 1.45863  |
| C | -3.52569 | 3.9449   | 0.70737  |
| H | -3.71529 | 4.46546  | 1.62638  |
| H | -3.21777 | 4.54677  | -0.12803 |
| N | 4.95846  | -1.00343 | 0.26305  |
| C | 6.42001  | -0.85306 | 0.30941  |
| H | 6.68332  | -0.16487 | 1.08528  |
| H | 6.87022  | -1.80329 | 0.50759  |
| H | 6.77034  | -0.48155 | -0.63088 |

|                                              |                             |
|----------------------------------------------|-----------------------------|
| Zero-point correction=                       | 0.302851 (Hartree/Particle) |
| Thermal correction to Energy=                | 0.319061                    |
| Thermal correction to Enthalpy=              | 0.320005                    |
| Thermal correction to Gibbs Free Energy=     | 0.255707                    |
| Sum of electronic and zero-point Energies=   | -843.846442                 |
| Sum of electronic and thermal Energies=      | -843.830232                 |
| Sum of electronic and thermal Enthalpies=    | -843.829288                 |
| Sum of electronic and thermal Free Energies= | -843.893585                 |

Table S18. XYZ coordinates optimized molecular geometry of **A5-cis**.

|   |            |             |             |
|---|------------|-------------|-------------|
| C | 2.36149100 | 0.31102200  | 0.21817900  |
| C | 2.00785300 | -1.00395400 | -0.09616800 |
| C | 0.56292100 | -1.06407100 | -0.10341900 |

|   |             |             |             |
|---|-------------|-------------|-------------|
| C | 0.12287200  | 0.19981900  | 0.19917200  |
| N | 1.18711200  | 1.02639000  | 0.39653700  |
| H | -2.15371000 | -1.48488400 | 2.17216900  |
| C | 4.65756700  | -0.25305600 | 0.07108900  |
| C | 4.31201100  | -1.57521100 | -0.24530900 |
| C | 2.99358100  | -1.95800400 | -0.33101300 |
| C | 3.69396400  | 0.70147200  | 0.30465100  |
| H | 5.69246000  | 0.01949700  | 0.13085100  |
| H | 5.08953100  | -2.29140000 | -0.42236900 |
| H | 2.71939800  | -2.96467300 | -0.57285000 |
| H | 3.96953200  | 1.70840400  | 0.54159300  |
| N | -0.05977300 | -2.27233200 | -0.42723500 |
| N | -1.27984700 | -2.52326100 | -0.44892000 |
| C | -2.24774400 | -1.54615400 | -0.05469900 |
| C | -3.11169500 | -0.86616400 | -0.86671800 |
| C | -2.59554100 | -1.15766900 | 1.26050500  |
| H | -3.20585100 | -0.86798600 | -1.92669800 |
| H | -0.86437100 | 0.57829500  | 0.29085400  |
| N | -3.58794600 | -0.29271300 | 1.25246300  |
| N | -3.90030300 | -0.11099600 | -0.07171100 |
| C | -4.98380800 | 0.79460200  | -0.44528700 |
| H | -5.06921900 | 0.80776200  | -1.52043000 |
| H | -5.91048500 | 0.44898200  | -0.01220600 |
| H | -4.76394100 | 1.78884100  | -0.08673100 |
| C | 1.07156500  | 2.46205100  | 0.70091300  |
| H | 0.31028900  | 2.59464600  | 1.45674400  |
| H | 2.01580200  | 2.78196200  | 1.11731100  |
| C | 0.74010900  | 3.25521600  | -0.53959900 |
| H | 1.41926300  | 3.13161100  | -1.36331700 |
| C | -0.29797000 | 4.05834600  | -0.63317200 |
| H | -0.49744100 | 4.61827500  | -1.52652500 |
| H | -0.98901500 | 4.19158300  | 0.17892800  |

|                                              |                             |
|----------------------------------------------|-----------------------------|
| Zero-point correction=                       | 0.302377 (Hartree/Particle) |
| Thermal correction to Energy=                | 0.318665                    |
| Thermal correction to Enthalpy=              | 0.319609                    |
| Thermal correction to Gibbs Free Energy=     | 0.253902                    |
| Sum of electronic and zero-point Energies=   | -843.821231                 |
| Sum of electronic and thermal Energies=      | -843.804944                 |
| Sum of electronic and thermal Enthalpies=    | -843.804000                 |
| Sum of electronic and thermal Free Energies= | -843.869706                 |

Table S19. XYZ coordinates optimized molecular geometry of **A6-trans**.

|   |          |          |          |
|---|----------|----------|----------|
| C | -1.94503 | 1.24337  | -0.04594 |
| C | -0.62404 | 1.70357  | -0.05278 |
| C | 0.22468  | 0.53755  | -0.01451 |
| C | -0.58874 | -0.54944 | 0.01228  |
| N | -1.90701 | -0.14628 | -0.00322 |
| H | -0.33231 | -1.58121 | 0.05437  |
| C | -2.74122 | 3.47143  | -0.14948 |
| C | -1.42039 | 3.94397  | -0.14668 |
| C | -0.35955 | 3.0696   | -0.10088 |
| C | -3.01946 | 2.12438  | -0.10123 |
| H | -3.54993 | 4.1736   | -0.1917  |
| H | -1.24191 | 5.0001   | -0.18406 |
| H | 0.65218  | 3.42216  | -0.10464 |
| H | -4.02836 | 1.76775  | -0.10698 |
| N | 1.61858  | 0.61475  | -0.00457 |
| N | 2.23677  | -0.46994 | 0.02697  |
| C | 3.62666  | -0.37824 | 0.03661  |
| C | 4.47415  | 0.75793  | 0.01693  |
| C | 4.47813  | -1.45532 | 0.069    |
| H | 4.18153  | 1.77998  | -0.00945 |
| H | 4.25918  | -2.49664 | 0.09164  |
| C | -5.19262 | -2.75417 | 0.05829  |
| C | -4.24107 | -2.85733 | -0.94253 |
| C | -3.16316 | -1.98947 | -0.97073 |
| C | -3.02825 | -1.0261  | 0.01587  |
| C | -3.97282 | -0.92622 | 1.02549  |
| C | -5.05781 | -1.78513 | 1.03891  |
| H | -6.0302  | -3.42204 | 0.07459  |
| H | -4.3406  | -3.60291 | -1.70545 |
| H | -2.43596 | -2.05125 | -1.75452 |
| H | -3.85324 | -0.19027 | 1.79386  |
| H | -5.7874  | -1.70364 | 1.81923  |
| N | 5.72999  | -0.978   | 0.06795  |
| N | 5.738    | 0.40709  | 0.03552  |
| C | 7.15368  | 0.01172  | 0.05639  |
| H | 7.36855  | -0.59031 | -0.80169 |
| H | 7.76875  | 0.88713  | 0.04098  |
| H | 7.3542   | -0.54947 | 0.94508  |

|                                            |                             |
|--------------------------------------------|-----------------------------|
| Zero-point correction=                     | 0.323966 (Hartree/Particle) |
| Thermal correction to Energy=              | 0.340870                    |
| Thermal correction to Enthalpy=            | 0.341814                    |
| Thermal correction to Gibbs Free Energy=   | 0.275808                    |
| Sum of electronic and zero-point Energies= | -956.825619                 |

|                                              |             |
|----------------------------------------------|-------------|
| Sum of electronic and thermal Energies=      | -956.808715 |
| Sum of electronic and thermal Enthalpies=    | -956.807770 |
| Sum of electronic and thermal Free Energies= | -956.873777 |

Table S20. XYZ coordinates optimized molecular geometry of **A6-cis**.

|   |             |             |             |
|---|-------------|-------------|-------------|
| C | -2.02168200 | -0.85084900 | 0.00133500  |
| C | -1.28065800 | -2.03208000 | -0.02783200 |
| C | 0.11784400  | -1.65960500 | -0.05312200 |
| C | 0.15745600  | -0.29232700 | -0.04114000 |
| N | -1.11788600 | 0.20829600  | -0.01246600 |
| H | 0.98248900  | 0.37410900  | -0.06273000 |
| C | -4.03786000 | -2.08694700 | 0.06412600  |
| C | -3.30352800 | -3.28135100 | 0.02409800  |
| C | -1.92855600 | -3.26375900 | -0.01983900 |
| C | -3.41041700 | -0.86182800 | 0.05449900  |
| H | -5.10802600 | -2.12925400 | 0.10393600  |
| H | -3.82592200 | -4.21714700 | 0.03100100  |
| H | -1.35896800 | -4.17021400 | -0.04516200 |
| H | -3.97160000 | 0.04867300  | 0.08721000  |
| N | 1.08197900  | -2.67169900 | -0.12617000 |
| N | 2.32034900  | -2.54707400 | -0.10825400 |
| C | 2.93759400  | -1.26748100 | 0.06193200  |
| C | 3.59977300  | -0.53775200 | -0.88517300 |
| C | 3.09155400  | -0.53835700 | 1.26456400  |
| H | 3.74082100  | -0.72384600 | -1.92330700 |
| H | 2.72270500  | -0.79355100 | 2.23021400  |
| N | 3.78320600  | 0.56373600  | 1.06396200  |
| N | 4.09022300  | 0.56188200  | -0.27379000 |
| C | 4.87756400  | 1.65414200  | -0.84074300 |
| H | 4.97684800  | 1.49477500  | -1.90292600 |
| H | 4.37408500  | 2.59164700  | -0.66012500 |
| H | 5.85565600  | 1.67280600  | -0.38366300 |
| C | -1.44430500 | 1.59825800  | 0.00867200  |
| C | -0.98034600 | 2.39664000  | 1.04070900  |
| C | -2.21286900 | 2.14412200  | -1.00700600 |
| C | -1.28123200 | 3.74779000  | 1.05201400  |
| H | -0.39804000 | 1.96212900  | 1.82752300  |
| C | -2.52451700 | 3.49212200  | -0.98161000 |
| H | -2.55462800 | 1.52170900  | -1.80834200 |
| C | -2.05686400 | 4.29663900  | 0.04471000  |
| H | -0.91881600 | 4.36431200  | 1.84963700  |
| H | -3.12076700 | 3.91241900  | -1.76614800 |
| H | -2.29463500 | 5.34118200  | 0.05873400  |



|                                              |                             |
|----------------------------------------------|-----------------------------|
| Zero-point correction=                       | 0.323586 (Hartree/Particle) |
| Thermal correction to Energy=                | 0.340517                    |
| Thermal correction to Enthalpy=              | 0.341461                    |
| Thermal correction to Gibbs Free Energy=     | 0.274787                    |
| Sum of electronic and zero-point Energies=   | -956.799929                 |
| Sum of electronic and thermal Energies=      | -956.782997                 |
| Sum of electronic and thermal Enthalpies=    | -956.782053                 |
| Sum of electronic and thermal Free Energies= | -956.848727                 |

**Table S21. XYZ coordinates optimized molecular geometry of A7-trans.**

|   |          |          |          |
|---|----------|----------|----------|
| C | 1.57979  | 1.27386  | -0.45898 |
| C | 0.30141  | 1.66532  | -0.04154 |
| C | -0.58079 | 0.55933  | -0.32157 |
| C | 0.17818  | -0.42168 | -0.88284 |
| N | 1.48364  | -0.00878 | -0.97131 |
| H | -0.1208  | -1.38313 | -1.22826 |
| C | 2.46057  | 3.36736  | 0.21501  |
| C | 1.18384  | 3.76912  | 0.63599  |
| C | 0.10291  | 2.9272   | 0.51267  |
| C | 2.67425  | 2.12296  | -0.3327  |
| H | 3.28591  | 4.04248  | 0.32479  |
| H | 1.05547  | 4.74551  | 1.05918  |
| H | -0.87454 | 3.2282   | 0.83235  |
| H | 3.65209  | 1.81776  | -0.64272 |
| N | -1.94632 | 0.58351  | -0.03911 |
| N | -2.59706 | -0.44185 | -0.33205 |
| C | -3.95996 | -0.39927 | -0.04287 |
| C | -4.74542 | 0.62715  | 0.53921  |
| C | -4.84148 | -1.42238 | -0.29079 |
| H | -4.41536 | 1.58262  | 0.86938  |
| H | -4.67012 | -2.3802  | -0.72201 |
| C | 2.58568  | -0.78424 | -1.54083 |
| H | 2.15217  | -1.65279 | -2.01817 |
| H | 3.07244  | -0.19431 | -2.30596 |
| C | 3.60346  | -1.2253  | -0.49865 |
| C | 4.95494  | -1.21164 | -0.80664 |
| C | 3.19648  | -1.68116 | 0.7473   |
| C | 5.89087  | -1.65299 | 0.11603  |
| H | 5.28044  | -0.85568 | -1.76531 |
| C | 4.1294   | -2.1195  | 1.67007  |
| H | 2.15437  | -1.68915 | 0.99705  |
| C | 5.48     | -2.10745 | 1.35657  |

|   |          |          |          |
|---|----------|----------|----------|
| H | 6.93327  | -1.63612 | -0.13338 |
| H | 3.80493  | -2.46875 | 2.63028  |
| H | 6.20184  | -2.44585 | 2.07301  |
| N | -6.05237 | -1.01799 | 0.11819  |
| N | -6.00223 | 0.26397  | 0.63943  |
| C | -7.40967 | -0.14554 | 0.75045  |
| H | -7.47955 | -1.01928 | 1.36412  |
| H | -7.97786 | 0.64656  | 1.19163  |
| H | -7.79605 | -0.36197 | -0.2236  |

|                                              |                             |
|----------------------------------------------|-----------------------------|
| Zero-point correction=                       | 0.354976 (Hartree/Particle) |
| Thermal correction to Energy=                | 0.373118                    |
| Thermal correction to Enthalpy=              | 0.374062                    |
| Thermal correction to Gibbs Free Energy=     | 0.304207                    |
| Sum of electronic and zero-point Energies=   | -995.613725                 |
| Sum of electronic and thermal Energies=      | -995.595583                 |
| Sum of electronic and thermal Enthalpies=    | -995.594639                 |
| Sum of electronic and thermal Free Energies= | -995.664494                 |

Table S22. XYZ coordinates optimized molecular geometry of **A7-cis**.

|   |             |             |             |
|---|-------------|-------------|-------------|
| C | 1.29373300  | 1.44632500  | -0.51044800 |
| C | 0.34230200  | 2.30166500  | 0.04842100  |
| C | -0.90070000 | 1.56428100  | 0.12014800  |
| C | -0.64198600 | 0.32055600  | -0.39797300 |
| N | 0.66559400  | 0.23899100  | -0.77715700 |
| H | -1.28397000 | -0.51395200 | -0.53061600 |
| C | 2.93939000  | 3.14087100  | -0.36214700 |
| C | 1.99086400  | 4.00906100  | 0.19845800  |
| C | 0.69411000  | 3.59936100  | 0.40772800  |
| C | 2.60579100  | 1.85458500  | -0.72127300 |
| H | 3.94319400  | 3.48556000  | -0.51169000 |
| H | 2.28648300  | 5.00392100  | 0.46628700  |
| H | -0.03636400 | 4.25549500  | 0.83532900  |
| H | 3.33393500  | 1.19177000  | -1.14022200 |
| N | -2.03778600 | 2.20588300  | 0.61735200  |
| N | -3.17528300 | 1.72654700  | 0.78484300  |
| C | -3.44582200 | 0.34700100  | 0.51713400  |
| C | -4.14915700 | -0.16804900 | -0.53545900 |
| C | -3.14046300 | -0.76541800 | 1.33624800  |
| H | -4.57788300 | 0.31650300  | -1.38025300 |
| H | -2.60820400 | -0.76578300 | 2.25842800  |
| N | -3.60889800 | -1.88007600 | 0.81475700  |
| N | -4.22915600 | -1.50354000 | -0.35012300 |

|   |             |             |             |
|---|-------------|-------------|-------------|
| C | -4.88210700 | -2.50868200 | -1.18514900 |
| H | -5.28263800 | -2.02344300 | -2.06134800 |
| H | -4.16086800 | -3.25508500 | -1.48161200 |
| H | -5.68262900 | -2.97648900 | -0.63178700 |
| C | 1.29930000  | -0.93074900 | -1.39110400 |
| H | 1.77199800  | -0.62604500 | -2.31486700 |
| C | 2.31752400  | -1.59742200 | -0.47821600 |
| C | 3.51428700  | -2.06052300 | -1.00190700 |
| C | 2.04855200  | -1.78597800 | 0.87017000  |
| C | 4.43217400  | -2.70938100 | -0.19023700 |
| H | 3.73389200  | -1.91513700 | -2.04221100 |
| C | 2.96452300  | -2.43064500 | 1.68184200  |
| H | 1.12835000  | -1.42655600 | 1.28572400  |
| C | 4.15937900  | -2.89517000 | 1.15324200  |
| H | 5.35501400  | -3.06174200 | -0.60640000 |
| H | 2.74809600  | -2.57036400 | 2.72240100  |
| H | 4.86888400  | -3.39329700 | 1.78352300  |
| H | 0.51124900  | -1.63012800 | -1.63526200 |

|                                              |                             |
|----------------------------------------------|-----------------------------|
| Zero-point correction=                       | 0.354585 (Hartree/Particle) |
| Thermal correction to Energy=                | 0.372759                    |
| Thermal correction to Enthalpy=              | 0.373703                    |
| Thermal correction to Gibbs Free Energy=     | 0.303299                    |
| Sum of electronic and zero-point Energies=   | -995.588441                 |
| Sum of electronic and thermal Energies=      | -995.570268                 |
| Sum of electronic and thermal Enthalpies=    | -995.569323                 |
| Sum of electronic and thermal Free Energies= | -995.639727                 |

Table S23. XYZ coordinates optimized molecular geometry of **A8-trans**.

|   |          |          |          |
|---|----------|----------|----------|
| C | 1.56969  | 3.1158   | 0.48896  |
| C | 1.22012  | 1.87622  | -0.03998 |
| C | -0.10125 | 1.62599  | -0.42985 |
| C | -1.09075 | 2.59468  | -0.30119 |
| C | -0.72827 | 3.81533  | 0.22144  |
| C | 0.59283  | 4.07637  | 0.61494  |
| H | 2.58037  | 3.30906  | 0.78781  |
| H | -2.10212 | 2.39793  | -0.59145 |
| H | -1.46994 | 4.58119  | 0.33241  |
| H | 0.83805  | 5.03832  | 1.01913  |
| C | 1.09305  | -0.22508 | -0.84538 |
| C | 1.96673  | 0.67277  | -0.31433 |
| H | 1.27501  | -1.21971 | -1.17814 |
| N | -0.1598  | 0.33233  | -0.92069 |

|    |          |          |          |
|----|----------|----------|----------|
| N  | 3.33162  | 0.54744  | -0.05453 |
| N  | 3.85567  | -0.55107 | -0.33554 |
| C  | 5.21975  | -0.65868 | -0.07109 |
| C  | 5.97322  | -1.78228 | -0.30617 |
| C  | 6.12903  | 0.28505  | 0.46915  |
| H  | 5.68487  | -2.72474 | -0.708   |
| H  | 5.91666  | 1.28018  | 0.77826  |
| C  | -1.35099 | -0.32127 | -1.45562 |
| H  | -1.80469 | 0.32248  | -2.19699 |
| H  | -1.02806 | -1.22513 | -1.95437 |
| C  | -2.36925 | -0.67111 | -0.37878 |
| C  | -3.72131 | -0.58675 | -0.66931 |
| C  | -1.97095 | -1.11106 | 0.87415  |
| C  | -4.65426 | -0.94442 | 0.27875  |
| H  | -4.0473  | -0.24304 | -1.62958 |
| C  | -2.91616 | -1.4647  | 1.8191   |
| H  | -0.92873 | -1.17286 | 1.11148  |
| C  | -4.2669  | -1.38307 | 1.52311  |
| H  | -2.60686 | -1.80387 | 2.78707  |
| H  | -5.00136 | -1.65428 | 2.25159  |
| Br | -6.53232 | -0.8195  | -0.14677 |
| N  | 7.23012  | -1.50965 | 0.07131  |
| N  | 7.3377   | -0.21747 | 0.55782  |
| C  | 8.69099  | -0.78303 | 0.65604  |
| H  | 9.03035  | -1.06722 | -0.31811 |
| H  | 9.35486  | -0.05046 | 1.06535  |
| H  | 8.67282  | -1.64305 | 1.29238  |

|                                              |                             |
|----------------------------------------------|-----------------------------|
| Zero-point correction=                       | 0.344774 (Hartree/Particle) |
| Thermal correction to Energy=                | 0.364254                    |
| Thermal correction to Enthalpy=              | 0.365198                    |
| Thermal correction to Gibbs Free Energy=     | 0.291161                    |
| Sum of electronic and zero-point Energies=   | -3555.103352                |
| Sum of electronic and thermal Energies=      | -3555.083873                |
| Sum of electronic and thermal Enthalpies=    | -3555.082928                |
| Sum of electronic and thermal Free Energies= | -3555.156965                |

Table S24. XYZ coordinates optimized molecular geometry of **A8-cis**.

|   |             |            |             |
|---|-------------|------------|-------------|
| C | -0.42814500 | 2.00262500 | -0.46096400 |
| C | -1.65927700 | 2.48622400 | -0.01469600 |
| C | -2.56994300 | 1.36193100 | 0.01890400  |
| C | -1.85583200 | 0.27285400 | -0.40913900 |
| N | -0.57411000 | 0.64368000 | -0.69839600 |

|    |             |             |             |
|----|-------------|-------------|-------------|
| H  | -2.15586800 | -0.73704000 | -0.53671000 |
| C  | 0.50856700  | 4.16998500  | -0.30185600 |
| C  | -0.72449200 | 4.66684800  | 0.14553500  |
| C  | -1.81071000 | 3.83504600  | 0.29238700  |
| C  | 0.67292800  | 2.83810900  | -0.60869600 |
| H  | 1.33868500  | 4.84004000  | -0.40481800 |
| H  | -0.81555500 | 5.70976100  | 0.37535400  |
| H  | -2.75577300 | 4.20607200  | 0.63321000  |
| H  | 1.61753300  | 2.46106200  | -0.94180400 |
| N  | -3.89781400 | 1.58012800  | 0.39762500  |
| N  | -4.80278600 | 0.73505600  | 0.53159800  |
| C  | -4.54586100 | -0.66220400 | 0.36189300  |
| C  | -4.95387000 | -1.45806200 | -0.67162200 |
| C  | -3.91560500 | -1.53898100 | 1.27631100  |
| H  | -5.47463600 | -1.21149500 | -1.56632500 |
| H  | -3.47635100 | -1.29246900 | 2.21438500  |
| N  | -3.92396600 | -2.77656800 | 0.82753100  |
| N  | -4.56402700 | -2.71914800 | -0.38520100 |
| C  | -4.76376500 | -3.94129100 | -1.16006100 |
| H  | -5.24078900 | -3.68605300 | -2.09314400 |
| H  | -3.80800400 | -4.40312100 | -1.35573400 |
| H  | -5.39102400 | -4.62447500 | -0.60708200 |
| C  | 0.46986200  | -0.24549600 | -1.20761000 |
| H  | 0.88833400  | 0.18441900  | -2.10721300 |
| C  | 1.57170600  | -0.50246800 | -0.18977600 |
| C  | 2.88730800  | -0.58039200 | -0.61593400 |
| C  | 1.27946200  | -0.70071400 | 1.15113900  |
| C  | 3.88955600  | -0.85882300 | 0.28738400  |
| H  | 3.13183200  | -0.42433100 | -1.64655900 |
| C  | 2.29323100  | -0.97653800 | 2.04922500  |
| H  | 0.26653900  | -0.63648500 | 1.49257500  |
| C  | 3.60746500  | -1.05767300 | 1.61817200  |
| H  | 2.06639900  | -1.12905200 | 3.08499000  |
| H  | 4.39493500  | -1.26983300 | 2.30994400  |
| H  | -0.00352600 | -1.18061000 | -1.47403900 |
| Br | 5.71544800  | -0.96326600 | -0.32722100 |

|                                            |                             |
|--------------------------------------------|-----------------------------|
| Zero-point correction=                     | 0.344255 (Hartree/Particle) |
| Thermal correction to Energy=              | 0.363829                    |
| Thermal correction to Enthalpy=            | 0.364773                    |
| Thermal correction to Gibbs Free Energy=   | 0.289445                    |
| Sum of electronic and zero-point Energies= | -3555.078038                |
| Sum of electronic and thermal Energies=    | -3555.058464                |
| Sum of electronic and thermal Enthalpies=  | -3555.057520                |

Sum of electronic and thermal Free Energies= -3555.132848

Table S25. XYZ coordinates optimized molecular geometry of **A9-trans**.

|   |          |          |          |
|---|----------|----------|----------|
| C | -0.79656 | 1.6877   | 0.19639  |
| C | 0.50948  | 1.76905  | -0.28727 |
| C | 1.23011  | 0.61513  | 0.21338  |
| C | 0.37841  | -0.1168  | 0.95725  |
| N | -0.87223 | 0.50698  | 0.94499  |
| H | 0.52712  | -1.01766 | 1.49949  |
| C | -1.3493  | 3.72156  | -0.8668  |
| C | -0.04723 | 3.80987  | -1.37177 |
| C | 0.88985  | 2.84258  | -1.08263 |
| C | -1.74172 | 2.66485  | -0.07303 |
| H | -2.05539 | 4.49483  | -1.09337 |
| H | 0.22173  | 4.64715  | -1.98364 |
| H | 1.8917   | 2.90792  | -1.45513 |
| H | -2.72489 | 2.61528  | 0.34187  |
| N | 2.5832   | 0.39742  | -0.07507 |
| N | 3.09012  | -0.62919 | 0.42146  |
| C | 4.43358  | -0.85567 | 0.14516  |
| C | 5.33033  | -0.11956 | -0.59885 |
| C | 5.17367  | -1.96409 | 0.61599  |
| H | 5.19074  | 0.79078  | -1.13022 |
| H | 4.81913  | -2.75924 | 1.22918  |
| N | 6.41788  | -1.92002 | 0.2015   |
| N | 6.5007   | -0.76119 | -0.55665 |
| C | 7.77374  | -0.40234 | -1.17813 |
| H | 7.65023  | 0.5256   | -1.71374 |
| H | 8.52501  | -0.28427 | -0.41222 |
| H | 8.07122  | -1.18216 | -1.86261 |
| C | -2.04944 | -0.04203 | 1.63324  |
| C | -3.18107 | -0.26834 | 0.61354  |
| C | -4.31343 | 0.54635  | 0.63596  |
| C | -3.07395 | -1.28768 | -0.33252 |
| C | -5.3387  | 0.34125  | -0.28707 |
| H | -4.39792 | 1.3494   | 1.38243  |
| C | -4.099   | -1.49235 | -1.25653 |
| H | -2.18146 | -1.92976 | -0.35045 |
| C | -5.23133 | -0.6782  | -1.23387 |
| H | -6.23155 | 0.98295  | -0.26905 |
| H | -4.01408 | -2.29587 | -2.0026  |
| H | -6.03982 | -0.83969 | -1.96158 |
| O | -2.48808 | 0.87876  | 2.63556  |

|                                              |                             |
|----------------------------------------------|-----------------------------|
| Zero-point correction=                       | 0.335007 (Hartree/Particle) |
| Thermal correction to Energy=                | 0.353610                    |
| Thermal correction to Enthalpy=              | 0.354554                    |
| Thermal correction to Gibbs Free Energy=     | 0.284415                    |
| Sum of electronic and zero-point Energies=   | -1068.924581                |
| Sum of electronic and thermal Energies=      | -1068.905978                |
| Sum of electronic and thermal Enthalpies=    | -1068.905034                |
| Sum of electronic and thermal Free Energies= | -1068.975173                |

Table S26. XYZ coordinates optimized molecular geometry of **A9-cis**.

|   |             |             |             |
|---|-------------|-------------|-------------|
| C | -0.75866900 | 0.80490100  | 0.06358700  |
| C | 0.45111700  | 1.26220300  | 0.59611500  |
| C | 0.93633300  | 0.23659500  | 1.50379500  |
| C | 0.05108400  | -0.76491500 | 1.49903100  |
| N | -1.02170900 | -0.44854900 | 0.64177000  |
| H | 0.04961100  | -1.68627700 | 2.02925400  |
| C | -0.88369100 | 2.75245800  | -1.28759900 |
| C | 0.30624400  | 3.22911800  | -0.73118800 |
| C | 0.98298200  | 2.48506600  | 0.20866600  |
| C | -1.42657700 | 1.54413200  | -0.90532200 |
| H | -1.38804700 | 3.33612600  | -2.03137500 |
| H | 0.69632400  | 4.17496100  | -1.04872400 |
| H | 1.90512800  | 2.83199800  | 0.62998000  |
| H | -2.33288000 | 1.19437600  | -1.34540300 |
| N | 2.09356700  | 0.35956800  | 2.33712900  |
| N | 3.23995000  | 0.16163200  | 1.89580900  |
| C | 3.59062000  | -0.24577700 | 0.60806300  |
| C | 4.92376200  | -0.40799300 | 0.28808700  |
| C | 2.89337400  | -0.59383000 | -0.58664700 |
| H | 5.78095200  | -0.25451100 | 0.90012900  |
| H | 1.84861500  | -0.60224400 | -0.76587700 |
| N | 3.72876000  | -0.93271200 | -1.53606900 |
| N | 4.99531000  | -0.81115000 | -0.97557200 |
| C | 6.16928600  | -1.12116200 | -1.78951800 |
| H | 7.05515600  | -0.98048100 | -1.19065400 |
| H | 6.11161400  | -2.14618400 | -2.12206300 |
| H | 6.19637900  | -0.46160500 | -2.64332000 |
| C | -2.03538000 | -1.37592100 | 0.39718200  |
| C | -3.37510500 | -0.87377600 | 0.01070400  |
| C | -4.14008400 | -1.66186100 | -0.83655000 |
| C | -3.91740200 | 0.27259700  | 0.57418400  |
| C | -5.42783900 | -1.28004300 | -1.16138000 |

|   |             |             |             |
|---|-------------|-------------|-------------|
| H | -3.72036100 | -2.56104700 | -1.23914800 |
| C | -5.21315100 | 0.64274100  | 0.26406000  |
| H | -3.33905800 | 0.86377800  | 1.25399800  |
| C | -5.96407500 | -0.12702600 | -0.61025500 |
| H | -6.01081900 | -1.87916900 | -1.83091200 |
| H | -5.63502800 | 1.52354000  | 0.70383700  |
| H | -6.96509900 | 0.16697200  | -0.85492300 |
| O | -1.81007600 | -2.56085000 | 0.54795500  |

|                                              |                             |
|----------------------------------------------|-----------------------------|
| Zero-point correction=                       | 0.334786 (Hartree/Particle) |
| Thermal correction to Energy=                | 0.353246                    |
| Thermal correction to Enthalpy=              | 0.354190                    |
| Thermal correction to Gibbs Free Energy=     | 0.284755                    |
| Sum of electronic and zero-point Energies=   | -1068.900545                |
| Sum of electronic and thermal Energies=      | -1068.882085                |
| Sum of electronic and thermal Enthalpies=    | -1068.881141                |
| Sum of electronic and thermal Free Energies= | -1068.950576                |

Table S27. XYZ coordinates optimized molecular geometry of **A10-trans**.

|   |          |          |          |
|---|----------|----------|----------|
| C | -0.41632 | 0.71088  | -1.10355 |
| C | 0.83112  | 1.3022   | -0.8916  |
| C | 1.75301  | 0.24901  | -0.51727 |
| C | 1.07199  | -0.91003 | -0.52557 |
| N | -0.26823 | -0.66823 | -0.84491 |
| H | 1.40178  | -1.89822 | -0.31762 |
| C | -1.29905 | 2.81673  | -1.74337 |
| C | -0.06098 | 3.41829  | -1.50299 |
| C | 1.01239  | 2.66479  | -1.08205 |
| C | -1.49266 | 1.46405  | -1.55302 |
| H | -2.11836 | 3.41543  | -2.08762 |
| H | 0.05239  | 4.4721   | -1.65966 |
| H | 1.97272  | 3.10721  | -0.91181 |
| H | -2.44217 | 1.02042  | -1.75235 |
| N | 3.09955  | 0.50298  | -0.23064 |
| N | 3.79155  | -0.4901  | 0.07429  |
| C | 5.12936  | -0.242   | 0.35694  |
| C | 5.86015  | 0.97295  | 0.35893  |
| C | 6.04214  | -1.20692 | 0.71015  |
| H | 5.49373  | 1.94575  | 0.13482  |
| H | 5.91193  | -2.25676 | 0.82735  |
| C | -1.17144 | -1.72358 | -0.98687 |
| C | -2.60722 | -1.46251 | -0.72134 |
| C | -3.54313 | -2.19916 | -1.429   |



|    |          |          |          |
|----|----------|----------|----------|
| C  | -3.01331 | -0.60838 | 0.29237  |
| C  | -4.88815 | -2.0456  | -1.15424 |
| H  | -3.21466 | -2.87775 | -2.18861 |
| C  | -4.3532  | -0.47854 | 0.56924  |
| H  | -2.29475 | -0.06014 | 0.86254  |
| C  | -5.29392 | -1.18237 | -0.15114 |
| H  | -5.61855 | -2.5973  | -1.70909 |
| H  | -6.33326 | -1.06422 | 0.0716   |
| O  | -0.76434 | -2.82957 | -1.27721 |
| Br | -4.92035 | 0.69919  | 1.98343  |
| N  | 7.21618  | -0.59588 | 0.903    |
| N  | 7.11336  | 0.7706   | 0.68544  |
| C  | 8.51882  | 0.54329  | 1.05138  |
| H  | 9.04439  | 1.47529  | 1.0445   |
| H  | 8.56754  | 0.11357  | 2.03009  |
| H  | 8.96756  | -0.12444 | 0.34593  |

|                                              |                             |
|----------------------------------------------|-----------------------------|
| Zero-point correction=                       | 0.324707 (Hartree/Particle) |
| Thermal correction to Energy=                | 0.344663                    |
| Thermal correction to Enthalpy=              | 0.345607                    |
| Thermal correction to Gibbs Free Energy=     | 0.271520                    |
| Sum of electronic and zero-point Energies=   | -3628.412239                |
| Sum of electronic and thermal Energies=      | -3628.392283                |
| Sum of electronic and thermal Enthalpies=    | -3628.391339                |
| Sum of electronic and thermal Free Energies= | -3628.465427                |

Table S28. XYZ coordinates optimized molecular geometry of **A10-cis**.

|   |             |             |             |
|---|-------------|-------------|-------------|
| C | -0.55601400 | 1.18564700  | 0.14661200  |
| C | -1.88470300 | 1.57022600  | -0.05886200 |
| C | -2.33236100 | 0.93361800  | -1.28632500 |
| C | -1.31373600 | 0.21665200  | -1.77013300 |
| N | -0.18930900 | 0.36083200  | -0.93124500 |
| H | -1.24722200 | -0.38466300 | -2.64428000 |
| C | -0.53834300 | 2.38696200  | 2.19322900  |
| C | -1.85369500 | 2.80342900  | 1.97314300  |
| C | -2.53619500 | 2.39308600  | 0.85010800  |
| C | 0.12250000  | 1.57663300  | 1.29428900  |
| H | -0.02839600 | 2.70028200  | 3.08197700  |
| H | -2.33425500 | 3.43698600  | 2.69087500  |
| H | -3.55098600 | 2.69164400  | 0.67940500  |
| H | 1.12427800  | 1.26336000  | 1.48390800  |
| N | -3.60105100 | 1.15632000  | -1.91021100 |
| N | -4.62827200 | 0.56534700  | -1.53129800 |

|    |             |             |             |
|----|-------------|-------------|-------------|
| C  | -4.72640400 | -0.40138700 | -0.53023100 |
| C  | -5.95857900 | -0.95139300 | -0.23828300 |
| C  | -3.82383200 | -1.06031600 | 0.35616400  |
| H  | -6.90512700 | -0.73794800 | -0.67567200 |
| H  | -2.77694600 | -0.92687100 | 0.45611300  |
| N  | -4.45414700 | -1.92482000 | 1.11075200  |
| N  | -5.78876700 | -1.84604600 | 0.72857600  |
| C  | -6.77406400 | -2.69655500 | 1.39410100  |
| H  | -7.74123500 | -2.52254800 | 0.94965100  |
| H  | -6.49401600 | -3.73086500 | 1.26692900  |
| H  | -6.80538800 | -2.45358200 | 2.44522700  |
| C  | 0.97861000  | -0.35587900 | -1.17849600 |
| C  | 2.26808900  | 0.20947700  | -0.70911600 |
| C  | 3.26350500  | -0.68734800 | -0.35432100 |
| C  | 2.53663400  | 1.56842100  | -0.75117900 |
| C  | 4.50381100  | -0.21961000 | 0.00434800  |
| H  | 3.05838600  | -1.73650600 | -0.35755700 |
| C  | 3.79498000  | 2.02535100  | -0.40628200 |
| H  | 1.77940600  | 2.25953400  | -1.05737200 |
| C  | 4.77746100  | 1.13083200  | -0.01844200 |
| H  | 4.01419000  | 3.07250300  | -0.44128100 |
| H  | 5.74898800  | 1.48327300  | 0.25675800  |
| O  | 0.92836000  | -1.39448500 | -1.80667500 |
| Br | 5.87646500  | -1.46306400 | 0.53116500  |

|                                              |                             |
|----------------------------------------------|-----------------------------|
| Zero-point correction=                       | 0.324296 (Hartree/Particle) |
| Thermal correction to Energy=                | 0.344221                    |
| Thermal correction to Enthalpy=              | 0.345165                    |
| Thermal correction to Gibbs Free Energy=     | 0.270677                    |
| Sum of electronic and zero-point Energies=   | -3628.388564                |
| Sum of electronic and thermal Energies=      | -3628.368639                |
| Sum of electronic and thermal Enthalpies=    | -3628.367695                |
| Sum of electronic and thermal Free Energies= | -3628.442183                |

Table S29. XYZ coordinates optimized molecular geometry of **A11-trans**.

|   |          |          |          |
|---|----------|----------|----------|
| C | -0.89359 | 1.71335  | 0.1962   |
| C | 0.38399  | 1.89119  | -0.33523 |
| C | 1.19952  | 0.78027  | 0.11507  |
| C | 0.42881  | -0.01986 | 0.87667  |
| N | -0.86073 | 0.51766  | 0.92373  |
| H | 0.65819  | -0.91812 | 1.39453  |
| C | -1.62297 | 3.72348  | -0.80367 |
| C | -0.3507  | 3.90848  | -1.35616 |

|   |          |          |          |
|---|----------|----------|----------|
| C | 0.65975  | 3.00182  | -1.12279 |
| C | -1.91203 | 2.62875  | -0.01706 |
| H | -2.38765 | 4.45105  | -0.98741 |
| H | -0.1626  | 4.7726   | -1.96087 |
| H | 1.63935  | 3.14173  | -1.53206 |
| H | -2.87276 | 2.50546  | 0.43373  |
| N | 2.55135  | 0.65815  | -0.23061 |
| N | 3.14767  | -0.33313 | 0.23736  |
| C | 4.48862  | -0.46078 | -0.10233 |
| C | 5.31599  | 0.35831  | -0.91152 |
| C | 5.30464  | -1.48219 | 0.32218  |
| H | 5.04009  | 1.25039  | -1.42038 |
| H | 5.08429  | -2.31422 | 0.94836  |
| S | -2.14878 | -0.22247 | 1.76219  |
| C | -3.1788  | -0.89551 | 0.45355  |
| C | -4.44165 | -0.37984 | 0.29967  |
| C | -2.70176 | -1.92032 | -0.33614 |
| C | -5.25286 | -0.89403 | -0.69636 |
| H | -4.78325 | 0.3997   | 0.94718  |
| C | -3.51727 | -2.4248  | -1.32444 |
| H | -1.72004 | -2.32188 | -0.18756 |
| C | -4.80096 | -1.91541 | -1.51823 |
| H | -6.23893 | -0.49723 | -0.82664 |
| H | -3.16017 | -3.21938 | -1.94814 |
| C | -5.67714 | -2.48347 | -2.6147  |
| H | -5.21849 | -2.31933 | -3.58354 |
| H | -5.80472 | -3.55159 | -2.48025 |
| H | -6.65323 | -2.01785 | -2.61449 |
| O | -1.45677 | -1.34879 | 2.62113  |
| O | -2.96502 | 0.89578  | 2.51211  |
| N | 6.51627  | -1.27044 | -0.20232 |
| N | 6.53458  | -0.11965 | -0.97765 |
| C | 7.90127  | -0.65588 | -1.05188 |
| H | 8.50143  | -0.0188  | -1.66738 |
| H | 8.3209   | -0.70026 | -0.0686  |
| H | 7.87629  | -1.63891 | -1.47371 |

|                                            |                             |
|--------------------------------------------|-----------------------------|
| Zero-point correction=                     | 0.362636 (Hartree/Particle) |
| Thermal correction to Energy=              | 0.384867                    |
| Thermal correction to Enthalpy=            | 0.385811                    |
| Thermal correction to Gibbs Free Energy=   | 0.305216                    |
| Sum of electronic and zero-point Energies= | -1539.859690                |
| Sum of electronic and thermal Energies=    | -1539.837459                |
| Sum of electronic and thermal Enthalpies=  | -1539.836515                |

Sum of electronic and thermal Free Energies= -1539.917110

Table S30. XYZ coordinates optimized molecular geometry of **A11-cis**.

|   |             |             |             |
|---|-------------|-------------|-------------|
| C | -0.09057900 | 0.93122000  | -0.39190800 |
| C | 0.90349600  | 1.19661400  | 0.55230700  |
| C | 1.17375700  | -0.04790700 | 1.25417700  |
| C | 0.36288200  | -0.99160700 | 0.75992000  |
| N | -0.43218400 | -0.41447300 | -0.25070500 |
| H | 0.25819000  | -2.02161200 | 0.99966100  |
| C | -0.01785900 | 3.17257600  | -1.13460900 |
| C | 0.96540200  | 3.45792400  | -0.18069500 |
| C | 1.43613300  | 2.47584600  | 0.66163200  |
| C | -0.55537200 | 1.90990600  | -1.25798000 |
| H | -0.35610400 | 3.94988500  | -1.78972200 |
| H | 1.35977300  | 4.45160300  | -0.11423700 |
| H | 2.19632000  | 2.68697600  | 1.38646400  |
| H | -1.28043700 | 1.68338900  | -2.00878800 |
| N | 2.07291500  | -0.18627700 | 2.35999300  |
| N | 3.30063300  | -0.29714200 | 2.18926500  |
| C | 3.98235600  | -0.36201900 | 0.97486600  |
| C | 5.35976100  | -0.46047000 | 0.97459000  |
| C | 3.62471900  | -0.37359000 | -0.40620800 |
| H | 6.02727300  | -0.48770400 | 1.80323700  |
| H | 2.66020000  | -0.31725500 | -0.84249100 |
| N | 4.68694200  | -0.46864100 | -1.16512800 |
| N | 5.76519900  | -0.52044800 | -0.28839600 |
| C | 7.11971900  | -0.62620800 | -0.82815400 |
| H | 7.81931100  | -0.66214000 | -0.00819200 |
| H | 7.19912000  | -1.52722600 | -1.41667400 |
| H | 7.32540600  | 0.23346900  | -1.44726200 |
| C | -3.17718800 | -0.72819000 | -0.33648800 |
| C | -4.01453100 | 0.06806400  | -1.07753300 |
| C | -3.49215800 | -1.13808700 | 0.94171400  |
| C | -5.20276900 | 0.49219400  | -0.50961600 |
| H | -3.74956400 | 0.34074800  | -2.07714100 |
| C | -4.67740100 | -0.71031800 | 1.49753100  |
| H | -2.83576300 | -1.78168100 | 1.49122900  |
| C | -5.54431900 | 0.11306600  | 0.78003400  |
| H | -4.93578300 | -1.01867400 | 2.49055900  |
| O | -1.34357600 | -2.78821700 | -0.75537800 |
| S | -1.64071900 | -1.27628600 | -1.08684200 |
| O | -1.62256300 | -0.81055600 | -2.59091600 |
| H | -5.86293300 | 1.11534400  | -1.07766400 |

|   |             |             |            |
|---|-------------|-------------|------------|
| C | -6.84040300 | 0.57342700  | 1.41326000 |
| H | -6.63575400 | 1.16277700  | 2.30020400 |
| H | -7.41706200 | 1.17732700  | 0.72599000 |
| H | -7.43997700 | -0.28024400 | 1.70841600 |

|                                              |                             |
|----------------------------------------------|-----------------------------|
| Zero-point correction=                       | 0.362294 (Hartree/Particle) |
| Thermal correction to Energy=                | 0.384428                    |
| Thermal correction to Enthalpy=              | 0.385372                    |
| Thermal correction to Gibbs Free Energy=     | 0.306091                    |
| Sum of electronic and zero-point Energies=   | -1539.835822                |
| Sum of electronic and thermal Energies=      | -1539.813688                |
| Sum of electronic and thermal Enthalpies=    | -1539.812744                |
| Sum of electronic and thermal Free Energies= | -1539.892025                |

Table S31. XYZ coordinates optimized molecular geometry of **B1**.

|   |          |          |          |
|---|----------|----------|----------|
| C | 3.47282  | 0.39801  | -0.00001 |
| C | 2.41385  | -0.52101 | 0.00005  |
| C | 1.19844  | 0.25426  | 0.00001  |
| C | 1.5662   | 1.56584  | -0.00011 |
| N | 2.93286  | 1.66826  | -0.00011 |
| H | 0.94781  | 2.43201  | -0.00019 |
| C | 5.04182  | -1.37762 | 0.00012  |
| C | 3.98958  | -2.30622 | 0.00019  |
| C | 2.67875  | -1.88842 | 0.00015  |
| C | 4.7989   | -0.02305 | 0.00003  |
| H | 6.05375  | -1.73138 | 0.00015  |
| H | 4.21658  | -3.35386 | 0.00026  |
| H | 1.87309  | -2.59502 | 0.0002   |
| H | 5.6059   | 0.68117  | -0.00002 |
| N | -0.07581 | -0.31956 | 0.00006  |
| N | -1.03836 | 0.47594  | 0.00004  |
| C | -2.33007 | -0.03438 | -0.00001 |
| C | -2.8612  | -1.35526 | -0.00016 |
| C | -3.42446 | 0.8114   | 0.00007  |
| C | -2.14014 | -2.67222 | -0.00031 |
| H | -1.07608 | -2.51607 | -0.00022 |
| H | -2.41735 | -3.24797 | 0.8757   |
| H | -2.41724 | -3.24771 | -0.87653 |
| C | -3.40174 | 2.30799  | 0.00028  |
| H | -2.87575 | 2.66589  | 0.87638  |
| H | -2.87439 | 2.66609  | -0.8749  |
| H | -4.39365 | 2.73265  | -0.00044 |
| N | -4.51246 | 0.03603  | 0.       |

|   |          |          |          |
|---|----------|----------|----------|
| N | -4.17252 | -1.31553 | -0.00016 |
| C | -5.64217 | -1.28334 | -0.00017 |
| H | -5.9877  | -0.77115 | -0.87377 |
| H | -6.02084 | -2.2841  | -0.00029 |
| H | -5.98771 | -0.77135 | 0.87354  |
| H | 3.4572   | 2.51977  | -0.00017 |

|                                              |                             |
|----------------------------------------------|-----------------------------|
| Zero-point correction=                       | 0.296115 (Hartree/Particle) |
| Thermal correction to Energy=                | 0.311172                    |
| Thermal correction to Enthalpy=              | 0.312116                    |
| Thermal correction to Gibbs Free Energy=     | 0.252025                    |
| Sum of electronic and zero-point Energies=   | -806.241959                 |
| Sum of electronic and thermal Energies=      | -806.226902                 |
| Sum of electronic and thermal Enthalpies=    | -806.225958                 |
| Sum of electronic and thermal Free Energies= | -806.286048                 |

Table S32. XYZ coordinates optimized molecular geometry of **B2-trans**.

|   |          |          |          |
|---|----------|----------|----------|
| C | 3.47282  | 0.39801  | -0.00001 |
| C | 2.41385  | -0.52101 | 0.00005  |
| C | 1.19844  | 0.25426  | 0.00001  |
| C | 1.5662   | 1.56584  | -0.00011 |
| N | 2.93286  | 1.66826  | -0.00011 |
| H | 0.94781  | 2.43201  | -0.00019 |
| C | 5.04182  | -1.37762 | 0.00012  |
| C | 3.98958  | -2.30622 | 0.00019  |
| C | 2.67875  | -1.88842 | 0.00015  |
| C | 4.7989   | -0.02305 | 0.00003  |
| H | 6.05375  | -1.73138 | 0.00015  |
| H | 4.21658  | -3.35386 | 0.00026  |
| H | 1.87309  | -2.59502 | 0.0002   |
| H | 5.6059   | 0.68117  | -0.00002 |
| N | -0.07581 | -0.31956 | 0.00006  |
| N | -1.03836 | 0.47594  | 0.00004  |
| C | -2.33007 | -0.03438 | -0.00001 |
| C | -2.8612  | -1.35526 | -0.00016 |
| C | -3.42446 | 0.8114   | 0.00007  |
| C | -2.14014 | -2.67222 | -0.00031 |
| H | -1.07608 | -2.51607 | -0.00022 |
| H | -2.41735 | -3.24797 | 0.8757   |
| H | -2.41724 | -3.24771 | -0.87653 |
| C | -3.40174 | 2.30799  | 0.00028  |
| H | -2.87575 | 2.66589  | 0.87638  |
| H | -2.87439 | 2.66609  | -0.8749  |

|   |          |          |          |
|---|----------|----------|----------|
| H | -4.39365 | 2.73265  | -0.00044 |
| C | 3.69998  | 2.91402  | -0.0002  |
| H | 4.32374  | 2.97136  | -0.88221 |
| H | 3.01332  | 3.74668  | -0.00043 |
| H | 4.32349  | 2.97164  | 0.88197  |
| N | -4.51246 | 0.03603  | 0.       |
| N | -4.17252 | -1.31553 | -0.00016 |
| C | -5.64217 | -1.28334 | -0.00017 |
| H | -5.9877  | -0.77115 | -0.87377 |
| H | -6.02084 | -2.2841  | -0.00029 |
| H | -5.98771 | -0.77135 | 0.87354  |

|                                              |                             |
|----------------------------------------------|-----------------------------|
| Zero-point correction=                       | 0.325774 (Hartree/Particle) |
| Thermal correction to Energy=                | 0.342519                    |
| Thermal correction to Enthalpy=              | 0.343463                    |
| Thermal correction to Gibbs Free Energy=     | 0.279920                    |
| Sum of electronic and zero-point Energies=   | -845.026234                 |
| Sum of electronic and thermal Energies=      | -845.009489                 |
| Sum of electronic and thermal Enthalpies=    | -845.008545                 |
| Sum of electronic and thermal Free Energies= | -845.072088                 |

Table S33. XYZ coordinates optimized molecular geometry of **B2-cis**.

|   |             |             |             |
|---|-------------|-------------|-------------|
| C | 2.65100000  | 0.75813100  | 0.03755000  |
| C | 2.27013800  | -0.58317300 | 0.12089000  |
| C | 0.82542300  | -0.61599500 | 0.05417900  |
| C | 0.41632000  | 0.69168100  | -0.06392500 |
| N | 1.49753800  | 1.51579100  | -0.07377000 |
| H | -0.56076700 | 1.09796700  | -0.14420300 |
| C | 4.93237200  | 0.14811000  | 0.19231700  |
| C | 4.56149900  | -1.20217700 | 0.27770700  |
| C | 3.23758600  | -1.57622500 | 0.24331100  |
| C | 3.98684100  | 1.14143300  | 0.07194800  |
| H | 5.97125400  | 0.41022000  | 0.22152300  |
| H | 5.32488100  | -1.94882700 | 0.37104900  |
| H | 2.94716700  | -2.60504700 | 0.30819900  |
| H | 4.27376200  | 2.17113700  | 0.00732900  |
| N | 0.17282600  | -1.84698200 | 0.13965100  |
| N | -1.05502300 | -2.06598000 | 0.09589700  |
| C | -1.98276300 | -0.99334000 | -0.10102400 |
| C | -2.36412600 | -0.41408900 | -1.33653300 |
| N | -3.28547100 | 0.50312700  | -1.14587000 |
| N | -3.51421000 | 0.52237500  | 0.21789300  |
| C | -4.51507200 | 1.42373100  | 0.78011500  |

|   |             |             |             |
|---|-------------|-------------|-------------|
| H | -4.07871100 | 2.03466500  | 1.55774700  |
| H | -4.86130500 | 2.05427200  | -0.02195500 |
| H | -5.34761600 | 0.86558100  | 1.18645900  |
| C | -1.83347900 | -0.75403300 | -2.69460800 |
| H | -0.77882400 | -0.51317800 | -2.76854800 |
| H | -1.95213400 | -1.81241400 | -2.89632300 |
| H | -2.36935800 | -0.19367600 | -3.44852900 |
| C | 1.45702200  | 2.97608900  | -0.18803300 |
| H | 1.98276800  | 3.29458100  | -1.07763000 |
| H | 0.42762500  | 3.29294500  | -0.25274000 |
| H | 1.91347400  | 3.42950300  | 0.68096700  |
| C | -2.74447200 | -0.38488300 | 0.85735900  |
| C | -2.77494500 | -0.60985000 | 2.33430200  |
| H | -2.45683000 | 0.27810200  | 2.86984500  |
| H | -3.77526900 | -0.86445900 | 2.66597500  |
| H | -2.10979700 | -1.42215000 | 2.59088600  |

|                                              |                             |
|----------------------------------------------|-----------------------------|
| Zero-point correction=                       | 0.325419 (Hartree/Particle) |
| Thermal correction to Energy=                | 0.342969                    |
| Thermal correction to Enthalpy=              | 0.343913                    |
| Thermal correction to Gibbs Free Energy=     | 0.278294                    |
| Sum of electronic and zero-point Energies=   | -845.002041                 |
| Sum of electronic and thermal Energies=      | -844.984491                 |
| Sum of electronic and thermal Enthalpies=    | -844.983547                 |
| Sum of electronic and thermal Free Energies= | -845.049167                 |

Table S34. XYZ coordinates optimized molecular geometry of **B3-trans**.

|   |          |          |          |
|---|----------|----------|----------|
| C | 2.94001  | 0.60957  | -0.2505  |
| C | 1.72204  | 1.285    | -0.08737 |
| C | 0.68472  | 0.28705  | -0.16045 |
| C | 1.3019   | -0.91042 | -0.35949 |
| N | 2.66038  | -0.73385 | -0.41922 |
| H | 0.8672   | -1.87605 | -0.46771 |
| C | 4.119    | 2.65718  | -0.05125 |
| C | 2.90489  | 3.34172  | 0.11262  |
| C | 1.70717  | 2.66579  | 0.0954   |
| C | 4.15235  | 1.29364  | -0.23278 |
| H | 5.03848  | 3.20806  | -0.0336  |
| H | 2.91777  | 4.4044   | 0.2525   |
| H | 0.77695  | 3.18323  | 0.21913  |
| H | 5.08419  | 0.78017  | -0.35454 |
| N | -0.67407 | 0.58947  | -0.04289 |
| N | -1.46481 | -0.37462 | -0.12437 |



|   |          |          |          |
|---|----------|----------|----------|
| C | -2.82134 | -0.10564 | -0.01215 |
| C | -3.53657 | 1.11142  | 0.18493  |
| C | -3.7786  | -1.09507 | -0.08447 |
| C | -2.99724 | 2.49946  | 0.33144  |
| H | -2.3267  | 2.56128  | 1.17884  |
| H | -2.43458 | 2.78539  | -0.54804 |
| H | -3.81686 | 3.1911   | 0.47203  |
| C | -3.59428 | -2.56253 | -0.28331 |
| H | -2.54019 | -2.77901 | -0.36692 |
| H | -4.00253 | -3.11982 | 0.55277  |
| H | -4.09417 | -2.89556 | -1.18639 |
| C | 3.64595  | -1.80926 | -0.57717 |
| H | 4.45766  | -1.4409  | -1.18989 |
| H | 3.16711  | -2.61995 | -1.10892 |
| C | 4.18115  | -2.30913 | 0.77544  |
| H | 3.34899  | -2.66989 | 1.36881  |
| H | 4.63349  | -1.48125 | 1.30872  |
| C | 5.2144   | -3.43323 | 0.57447  |
| H | 6.05823  | -3.07958 | -0.00835 |
| H | 5.58688  | -3.78426 | 1.52952  |
| H | 4.76979  | -4.27519 | 0.0546   |
| N | -4.96624 | -0.49811 | 0.06016  |
| N | -4.82547 | 0.8788   | 0.22898  |
| C | -6.27322 | 0.6292   | 0.28035  |
| H | -6.78963 | 1.55451  | 0.42875  |
| H | -6.59174 | 0.18665  | -0.6403  |
| H | -6.49209 | -0.03523 | 1.08999  |

|                                              |                             |
|----------------------------------------------|-----------------------------|
| Zero-point correction=                       | 0.386714 (Hartree/Particle) |
| Thermal correction to Energy=                | 0.406821                    |
| Thermal correction to Enthalpy=              | 0.407765                    |
| Thermal correction to Gibbs Free Energy=     | 0.335637                    |
| Sum of electronic and zero-point Energies=   | -922.606971                 |
| Sum of electronic and thermal Energies=      | -922.586864                 |
| Sum of electronic and thermal Enthalpies=    | -922.585920                 |
| Sum of electronic and thermal Free Energies= | -922.658048                 |

Table S35. XYZ coordinates optimized molecular geometry of **B3-cis**.

|   |            |             |             |
|---|------------|-------------|-------------|
| C | 2.52770100 | 0.06538000  | -0.31295100 |
| C | 2.02431800 | -1.12560400 | 0.21773700  |
| C | 0.58249600 | -1.02508400 | 0.19234100  |
| C | 0.29239500 | 0.20510400  | -0.34539200 |
| N | 1.44417900 | 0.86493500  | -0.64802500 |

|   |             |             |             |
|---|-------------|-------------|-------------|
| H | -0.64660000 | 0.65889600  | -0.54317400 |
| C | 4.74331800  | -0.71933400 | -0.01022700 |
| C | 4.24637700  | -1.91655900 | 0.52658900  |
| C | 2.89246100  | -2.12704500 | 0.64375800  |
| C | 3.89747400  | 0.28010000  | -0.43326400 |
| H | 5.80300500  | -0.58022800 | -0.09163800 |
| H | 4.93541400  | -2.67244700 | 0.84705800  |
| H | 2.50218100  | -3.03749400 | 1.05113200  |
| H | 4.28899200  | 1.19003500  | -0.83848600 |
| N | -0.17681900 | -2.08572000 | 0.69162400  |
| N | -1.42009600 | -2.17802600 | 0.74119800  |
| C | -2.25350500 | -1.14143900 | 0.21119300  |
| C | -2.63479600 | -0.96425800 | -1.14187100 |
| N | -3.45889300 | 0.05288900  | -1.25449100 |
| N | -3.62343400 | 0.54194800  | 0.02851000  |
| C | -4.51526200 | 1.67126000  | 0.27233000  |
| H | -4.00320500 | 2.44144000  | 0.83156100  |
| H | -4.80827700 | 2.05867400  | -0.68937500 |
| H | -5.39408900 | 1.35515400  | 0.81795500  |
| C | -2.19805600 | -1.78229600 | -2.31728700 |
| H | -1.13122800 | -1.68136200 | -2.48310200 |
| H | -2.41570200 | -2.83145400 | -2.15360500 |
| H | -2.71825500 | -1.45335400 | -3.20652200 |
| C | 1.49089800  | 2.21295900  | -1.23908100 |
| H | 2.48730800  | 2.36967000  | -1.62349600 |
| H | 0.80331600  | 2.23719700  | -2.07372800 |
| C | -2.91294800 | -0.17861200 | 0.92321800  |
| C | -2.89869400 | 0.09716200  | 2.39180800  |
| H | -2.48082300 | 1.07619900  | 2.59972100  |
| H | -3.90208600 | 0.06386400  | 2.80116600  |
| H | -2.29685300 | -0.64662100 | 2.89445000  |
| C | 1.13346300  | 3.31141100  | -0.22393300 |
| H | 1.12483100  | 4.25709000  | -0.75507000 |
| H | 0.12997400  | 3.13999600  | 0.14913100  |
| C | 2.12495800  | 3.38245000  | 0.94984100  |
| H | 1.84892000  | 4.17912300  | 1.63120000  |
| H | 2.13331100  | 2.45188100  | 1.50354200  |
| H | 3.12971500  | 3.57800000  | 0.59070000  |

Table S36. XYZ coordinates optimized molecular geometry of **B4-trans**.

|   |          |         |         |
|---|----------|---------|---------|
| C | -2.34869 | 1.25501 | 0.03681 |
| C | -1.04178 | 1.75502 | 0.04301 |
| C | -0.15713 | 0.61563 | 0.01601 |

|   |          |          |          |
|---|----------|----------|----------|
| C | -0.93606 | -0.49507 | -0.00348 |
| N | -2.26891 | -0.1322  | 0.00567  |
| H | -0.64875 | -1.51891 | -0.03638 |
| C | -3.21105 | 3.45976  | 0.12088  |
| C | -1.90494 | 3.97173  | 0.11688  |
| C | -0.81857 | 3.12881  | 0.08056  |
| C | -3.44885 | 2.10471  | 0.08297  |
| H | -4.0406  | 4.13766  | 0.15581  |
| H | -1.7582  | 5.03302  | 0.14598  |
| H | 0.18222  | 3.51148  | 0.08367  |
| H | -4.44682 | 1.71859  | 0.08985  |
| N | 1.2363   | 0.73888  | 0.00874  |
| N | 1.88174  | -0.33043 | -0.02073 |
| C | 3.26482  | -0.25177 | -0.02728 |
| C | 4.15468  | 0.86125  | -0.00023 |
| C | 4.0671   | -1.37413 | -0.06499 |
| C | 3.82509  | 2.31967  | 0.04503  |
| H | 3.2418   | 2.5517   | 0.9269   |
| H | 4.74052  | 2.89537  | 0.05954  |
| H | 3.23609  | 2.60492  | -0.81717 |
| C | 3.64734  | -2.80685 | -0.10345 |
| H | 4.02766  | -3.3458  | 0.75687  |
| H | 2.56918  | -2.85543 | -0.0967  |
| H | 4.01383  | -3.29453 | -0.99968 |
| C | -3.36111 | -1.04658 | -0.00717 |
| C | -4.31597 | -0.97615 | -1.00981 |
| C | -3.45872 | -2.01561 | 0.97861  |
| C | -5.37358 | -1.86864 | -1.01642 |
| H | -4.22526 | -0.23637 | -1.77844 |
| C | -4.50883 | -2.91701 | 0.95699  |
| H | -2.72445 | -2.05558 | 1.75722  |
| C | -5.47083 | -2.84268 | -0.0364  |
| H | -6.11097 | -1.80917 | -1.79144 |
| H | -4.57904 | -3.66636 | 1.71954  |
| H | -6.28712 | -3.53653 | -0.04748 |
| N | 5.33246  | -0.9441  | -0.06132 |
| N | 5.39754  | 0.44798  | -0.01998 |
| C | 6.7962   | -0.0039  | -0.04166 |
| H | 6.97518  | -0.5674  | -0.93347 |
| H | 7.44596  | 0.84596  | -0.02032 |
| H | 6.98552  | -0.61917 | 0.81303  |

|                               |                             |
|-------------------------------|-----------------------------|
| Zero-point correction=        | 0.382550 (Hartree/Particle) |
| Thermal correction to Energy= | 0.400532                    |

|                                              |              |
|----------------------------------------------|--------------|
| Thermal correction to Enthalpy=              | 0.401476     |
| Thermal correction to Gibbs Free Energy=     | 0.333799     |
| Sum of electronic and zero-point Energies=   | -1034.418429 |
| Sum of electronic and thermal Energies=      | -1034.400447 |
| Sum of electronic and thermal Enthalpies=    | -1034.399503 |
| Sum of electronic and thermal Free Energies= | -1034.467181 |

Table S37. XYZ coordinates optimized molecular geometry of **B4-cis**.

|   |             |             |             |
|---|-------------|-------------|-------------|
| C | 2.22649600  | -0.94933500 | 0.05484600  |
| C | 1.39639700  | -2.07009200 | 0.06737800  |
| C | 0.03034100  | -1.59200300 | 0.03315500  |
| C | 0.09659400  | -0.22522500 | 0.00274400  |
| N | 1.40678700  | 0.17573300  | 0.01819300  |
| H | -0.67485500 | 0.50281400  | -0.01921900 |
| C | 4.14276000  | -2.33631700 | 0.08793500  |
| C | 3.31795200  | -3.47057200 | 0.11073500  |
| C | 1.94772000  | -3.34757100 | 0.09863000  |
| C | 3.61130300  | -1.06689700 | 0.05861100  |
| H | 5.20725100  | -2.46058900 | 0.09233300  |
| H | 3.76683200  | -4.44347800 | 0.13482300  |
| H | 1.30979500  | -4.20761600 | 0.11018500  |
| H | 4.24151500  | -0.20237400 | 0.03871500  |
| N | -1.01009000 | -2.52776900 | 0.06712700  |
| N | -2.23546200 | -2.30322400 | 0.02823700  |
| C | -2.73398900 | -0.96773100 | -0.10613300 |
| C | -2.87285800 | -0.22702900 | -1.30600700 |
| N | -3.42536900 | 0.93922800  | -1.05976700 |
| N | -3.65327500 | 0.96293000  | 0.30397400  |
| C | -4.30366700 | 2.11794500  | 0.91532100  |
| H | -3.75527900 | 2.43648300  | 1.79008000  |
| H | -4.30474700 | 2.90840800  | 0.18317900  |
| H | -5.32174200 | 1.88222300  | 1.19492300  |
| C | -2.47020600 | -0.65391500 | -2.68339900 |
| H | -1.39428100 | -0.76949800 | -2.75334200 |
| H | -2.92824400 | -1.60278700 | -2.93762900 |
| H | -2.78494900 | 0.08883200  | -3.40364700 |
| C | -3.25513300 | -0.18763400 | 0.88835800  |
| C | -3.38430900 | -0.46994500 | 2.35021900  |
| H | -2.78627300 | 0.22144700  | 2.93386200  |
| H | -4.41569700 | -0.38031700 | 2.67185800  |
| H | -3.04535000 | -1.47520700 | 2.55663400  |
| C | 1.83890000  | 1.53636000  | -0.01060500 |
| C | 1.47234700  | 2.35013300  | -1.06951700 |

|   |            |            |             |
|---|------------|------------|-------------|
| C | 2.61131900 | 2.03971400 | 1.02390400  |
| C | 1.87495800 | 3.67439100 | -1.08915800 |
| H | 0.88604800 | 1.94761000 | -1.87025500 |
| C | 3.02493900 | 3.35986300 | 0.99056100  |
| H | 2.87716000 | 1.40698300 | 1.84569200  |
| C | 2.65501500 | 4.18006900 | -0.06282900 |
| H | 1.58775700 | 4.30300300 | -1.90771600 |
| H | 3.62406900 | 3.74712600 | 1.78977600  |
| H | 2.97157900 | 5.20339200 | -0.08308400 |

|                                              |                             |
|----------------------------------------------|-----------------------------|
| Zero-point correction=                       | 0.382512 (Hartree/Particle) |
| Thermal correction to Energy=                | 0.402849                    |
| Thermal correction to Enthalpy=              | 0.403793                    |
| Thermal correction to Gibbs Free Energy=     | 0.329931                    |
| Sum of electronic and zero-point Energies=   | -1034.394764                |
| Sum of electronic and thermal Energies=      | -1034.374426                |
| Sum of electronic and thermal Enthalpies=    | -1034.373482                |
| Sum of electronic and thermal Free Energies= | -1034.447344                |

Table S38. XYZ coordinates optimized molecular geometry of **B5-trans**.

|   |          |          |          |
|---|----------|----------|----------|
| C | 1.99563  | 1.25766  | -0.56578 |
| C | 0.73036  | 1.71772  | -0.1779  |
| C | -0.18437 | 0.61822  | -0.36384 |
| C | 0.54324  | -0.4256  | -0.84495 |
| N | 1.86162  | -0.05805 | -0.97136 |
| H | 0.21638  | -1.40338 | -1.10965 |
| C | 2.9379   | 3.37341  | -0.06501 |
| C | 1.67498  | 3.84381  | 0.32564  |
| C | 0.57042  | 3.02551  | 0.27314  |
| C | 3.1139   | 2.08354  | -0.51138 |
| H | 3.78239  | 4.03154  | -0.01219 |
| H | 1.5761   | 4.85432  | 0.66926  |
| H | -0.39633 | 3.37951  | 0.57023  |
| H | 4.08137  | 1.72695  | -0.79848 |
| N | -1.54952 | 0.70662  | -0.07805 |
| N | -2.22446 | -0.32507 | -0.28072 |
| C | -3.58299 | -0.27012 | -0.00664 |
| C | -4.41223 | 0.7799   | 0.48499  |
| C | -4.4182  | -1.35116 | -0.19303 |
| C | -4.02848 | 2.17742  | 0.85738  |
| H | -3.28605 | 2.17308  | 1.64508  |
| H | -3.59746 | 2.69388  | 0.00934  |
| H | -4.90515 | 2.71354  | 1.19484  |

|   |          |          |          |
|---|----------|----------|----------|
| C | -4.08389 | -2.71729 | -0.69176 |
| H | -3.02736 | -2.76782 | -0.90647 |
| H | -4.32823 | -3.46956 | 0.05028  |
| H | -4.63765 | -2.94396 | -1.59633 |
| C | 2.93855  | -0.90908 | -1.47587 |
| H | 3.44352  | -0.39686 | -2.28401 |
| H | 2.47858  | -1.79887 | -1.88455 |
| C | 3.94292  | -1.29815 | -0.40032 |
| C | 5.2945   | -1.34656 | -0.704   |
| C | 3.52191  | -1.64488 | 0.87581  |
| C | 6.21659  | -1.7418  | 0.25296  |
| H | 5.63112  | -1.07477 | -1.68613 |
| C | 4.44092  | -2.03717 | 1.83257  |
| H | 2.47967  | -1.60388 | 1.12182  |
| C | 5.79172  | -2.08736 | 1.52347  |
| H | 7.25933  | -1.77357 | 0.00639  |
| H | 4.10565  | -2.30203 | 2.81579  |
| H | 6.50292  | -2.38974 | 2.26618  |
| N | -5.64553 | -0.95984 | 0.16411  |
| N | -5.65205 | 0.36863  | 0.58869  |
| C | -7.04607 | -0.08203 | 0.70921  |
| H | -7.64964 | 0.72044  | 1.07885  |
| H | -7.40674 | -0.38657 | -0.25103 |
| H | -7.09651 | -0.908   | 1.38755  |

|                                              |                             |
|----------------------------------------------|-----------------------------|
| Zero-point correction=                       | 0.414116 (Hartree/Particle) |
| Thermal correction to Energy=                | 0.435561                    |
| Thermal correction to Enthalpy=              | 0.436505                    |
| Thermal correction to Gibbs Free Energy=     | 0.359989                    |
| Sum of electronic and zero-point Energies=   | -1073.207896                |
| Sum of electronic and thermal Energies=      | -1073.186451                |
| Sum of electronic and thermal Enthalpies=    | -1073.185507                |
| Sum of electronic and thermal Free Energies= | -1073.262023                |

Table S39. XYZ coordinates optimized molecular geometry of **B5-cis**.

|   |             |             |             |
|---|-------------|-------------|-------------|
| C | -1.54956600 | 1.49376200  | 0.50349000  |
| C | -0.59426400 | 2.30591300  | -0.11052400 |
| C | 0.63036500  | 1.53846000  | -0.18544700 |
| C | 0.35733300  | 0.32003500  | 0.38449400  |
| N | -0.94194500 | 0.28220400  | 0.79771100  |
| H | 0.98419100  | -0.52382700 | 0.53110700  |
| C | -3.16064600 | 3.21916800  | 0.33359400  |
| C | -2.20831200 | 4.04381700  | -0.28343500 |

|   |             |             |             |
|---|-------------|-------------|-------------|
| C | -0.92674900 | 3.59704000  | -0.50967100 |
| C | -2.84626700 | 1.93970200  | 0.73229500  |
| H | -4.15230300 | 3.59224100  | 0.49550400  |
| H | -2.48898300 | 5.03446200  | -0.58129900 |
| H | -0.19342000 | 4.21980500  | -0.98016000 |
| H | -3.57755000 | 1.30970800  | 1.19418700  |
| N | 1.76646700  | 2.13349500  | -0.74016200 |
| N | 2.89264000  | 1.62280900  | -0.90345900 |
| C | 3.13766600  | 0.25715300  | -0.55043400 |
| C | 2.83591900  | -0.89117000 | -1.32412600 |
| N | 3.26451000  | -1.97517000 | -0.71791200 |
| N | 3.85376400  | -1.53774800 | 0.45419200  |
| C | 4.46566100  | -2.49710100 | 1.36836700  |
| H | 4.05460300  | -2.38706800 | 2.36202400  |
| H | 4.24131500  | -3.48151600 | 0.99239100  |
| H | 5.53780500  | -2.35990100 | 1.40573200  |
| C | 2.13643600  | -0.93131000 | -2.64723000 |
| H | 1.10827100  | -0.60038000 | -2.55113300 |
| H | 2.63284300  | -0.28400500 | -3.36093200 |
| H | 2.13913400  | -1.94175800 | -3.03261000 |
| C | 3.79661700  | -0.19253700 | 0.55988000  |
| C | 4.36319300  | 0.57757000  | 1.70829900  |
| H | 3.86209800  | 0.31944900  | 2.63492800  |
| H | 5.42095800  | 0.37144800  | 1.82719300  |
| H | 4.23620200  | 1.63636800  | 1.53265500  |
| C | -1.58500800 | -0.84980300 | 1.46994100  |
| H | -0.80757500 | -1.56205400 | 1.71114000  |
| H | -2.01879400 | -0.50326200 | 2.39805500  |
| C | -2.65000600 | -1.51842100 | 0.61356000  |
| C | -3.83722100 | -1.93723500 | 1.19338000  |
| C | -2.43435500 | -1.75367700 | -0.73704100 |
| C | -4.79824100 | -2.58837600 | 0.43530000  |
| H | -4.01575000 | -1.75550000 | 2.23581200  |
| C | -3.39343800 | -2.40068100 | -1.49535400 |
| H | -1.52219500 | -1.42863700 | -1.19622500 |
| C | -4.57851000 | -2.82083000 | -0.91064400 |
| H | -5.71307600 | -2.90619000 | 0.89467200  |
| H | -3.21805100 | -2.57660200 | -2.53813700 |
| H | -5.32140500 | -3.32078100 | -1.49965600 |

|                                          |                             |
|------------------------------------------|-----------------------------|
| Zero-point correction=                   | 0.413665 (Hartree/Particle) |
| Thermal correction to Energy=            | 0.435168                    |
| Thermal correction to Enthalpy=          | 0.436112                    |
| Thermal correction to Gibbs Free Energy= | 0.359342                    |

|                                              |              |
|----------------------------------------------|--------------|
| Sum of electronic and zero-point Energies=   | -1073.183210 |
| Sum of electronic and thermal Energies=      | -1073.161706 |
| Sum of electronic and thermal Enthalpies=    | -1073.160762 |
| Sum of electronic and thermal Free Energies= | -1073.237532 |

Table S40. XYZ coordinates optimized molecular geometry of **B6-trans**.

|   |          |          |          |
|---|----------|----------|----------|
| C | 1.84205  | 1.03584  | -0.31628 |
| C | 0.55854  | 1.57444  | -0.19456 |
| C | -0.37654 | 0.46804  | -0.16481 |
| C | 0.33454  | -0.66677 | -0.28027 |
| N | 1.70048  | -0.36646 | -0.34076 |
| H | 0.00917  | -1.6774  | -0.30985 |
| C | 2.74376  | 3.22754  | -0.41709 |
| C | 1.46507  | 3.77051  | -0.26511 |
| C | 0.36522  | 2.9484   | -0.15888 |
| C | 2.9492   | 1.86375  | -0.44869 |
| H | 3.58635  | 3.88235  | -0.51538 |
| H | 1.34333  | 4.83482  | -0.24267 |
| H | -0.62331 | 3.34865  | -0.06067 |
| H | 3.93141  | 1.46679  | -0.57317 |
| N | -1.75923 | 0.66361  | -0.04577 |
| N | -2.45454 | -0.37431 | -0.0438  |
| C | -3.82513 | -0.2383  | 0.06936  |
| C | -4.6611  | 0.91036  | 0.19395  |
| C | -4.676   | -1.32563 | 0.07877  |
| C | -4.26613 | 2.35259  | 0.23958  |
| H | -3.60576 | 2.54061  | 1.07643  |
| H | -3.73534 | 2.63154  | -0.66157 |
| H | -5.1519  | 2.96525  | 0.33791  |
| C | -4.34086 | -2.77586 | -0.02385 |
| H | -3.27123 | -2.88819 | -0.11391 |
| H | -4.67813 | -3.31167 | 0.85661  |
| H | -4.81591 | -3.22006 | -0.89163 |
| N | -5.91473 | -0.84571 | 0.20058  |
| C | 2.64676  | -1.37659 | -0.53454 |
| C | 4.02019  | -1.16513 | -0.02067 |
| C | 5.06594  | -1.75955 | -0.71176 |
| C | 4.26055  | -0.5151  | 1.18165  |
| C | 6.35718  | -1.66333 | -0.22934 |
| H | 4.8623   | -2.28508 | -1.6223  |
| C | 5.5506   | -0.43684 | 1.67339  |
| H | 3.45001  | -0.08385 | 1.73216  |
| C | 6.59888  | -1.00167 | 0.96424  |



|   |          |          |          |
|---|----------|----------|----------|
| H | 7.16619  | -2.10635 | -0.7737  |
| H | 5.73616  | 0.05846  | 2.60473  |
| H | 7.59851  | -0.93227 | 1.34404  |
| O | 2.3119   | -2.41177 | -1.07575 |
| N | -5.91698 | 0.5496   | 0.27262  |
| C | -7.3313  | 0.15871  | 0.36103  |
| H | -7.47565 | -0.46668 | 1.21715  |
| H | -7.93844 | 1.03497  | 0.45299  |
| H | -7.60928 | -0.37667 | -0.52271 |

|                                              |                             |
|----------------------------------------------|-----------------------------|
| Zero-point correction=                       | 0.393907 (Hartree/Particle) |
| Thermal correction to Energy=                | 0.415974                    |
| Thermal correction to Enthalpy=              | 0.416918                    |
| Thermal correction to Gibbs Free Energy=     | 0.338899                    |
| Sum of electronic and zero-point Energies=   | -1146.519419                |
| Sum of electronic and thermal Energies=      | -1146.497352                |
| Sum of electronic and thermal Enthalpies=    | -1146.496408                |
| Sum of electronic and thermal Free Energies= | -1146.574427                |

Table S41. XYZ coordinates optimized molecular geometry of **B6-cis**.

|   |             |             |             |
|---|-------------|-------------|-------------|
| C | 2.78294800  | -0.41730800 | -0.10252700 |
| C | 2.72950000  | 0.96667600  | 0.02781800  |
| C | 1.32840200  | 1.35335900  | 0.02398400  |
| C | 0.60019300  | 0.21734900  | -0.08744900 |
| N | 1.45488700  | -0.88197400 | -0.15192800 |
| H | -0.44721600 | 0.07719200  | -0.15074400 |
| C | 5.14565500  | -0.34476500 | -0.04063900 |
| C | 5.10146100  | 1.04648100  | 0.09225000  |
| C | 3.89548700  | 1.71245400  | 0.12528800  |
| C | 3.99278400  | -1.09553500 | -0.14286500 |
| H | 6.09533800  | -0.84052200 | -0.06949900 |
| H | 6.01774000  | 1.59721700  | 0.16570200  |
| H | 3.84603900  | 2.77719100  | 0.22372600  |
| H | 4.02324500  | -2.15389800 | -0.26362500 |
| N | 1.02265000  | 2.72633700  | 0.08808500  |
| N | -0.10598800 | 3.24665800  | 0.10583700  |
| C | -1.29423300 | 2.44717100  | 0.10464400  |
| C | -1.92913000 | 1.87759900  | 1.23562700  |
| N | -3.03756500 | 1.27169200  | 0.87568800  |
| N | -3.13194200 | 1.44775000  | -0.49210600 |
| C | -4.27914800 | 0.91342000  | -1.22067200 |
| H | -3.94737600 | 0.32456800  | -2.06381800 |
| H | -4.82606100 | 0.28654900  | -0.53618600 |

|   |             |             |             |
|---|-------------|-------------|-------------|
| H | -4.91769500 | 1.71379300  | -1.56897300 |
| C | -1.46229400 | 1.93261600  | 2.65715800  |
| H | -0.50229400 | 1.44150800  | 2.77009300  |
| H | -1.35484300 | 2.96083200  | 2.98329600  |
| H | -2.18042600 | 1.43825200  | 3.29686800  |
| C | -2.09468400 | 2.16877800  | -0.96827300 |
| C | -1.92636800 | 2.53871100  | -2.40642300 |
| H | -1.79846200 | 1.65509300  | -3.02210700 |
| H | -2.79215500 | 3.08139100  | -2.76835200 |
| H | -1.05394300 | 3.16609300  | -2.52191900 |
| C | 1.08118900  | -2.21110400 | -0.35327500 |
| C | -0.31020900 | -2.59978700 | -0.00980400 |
| C | -0.92174000 | -3.54945300 | -0.81650500 |
| C | -0.95196800 | -2.14105500 | 1.13207500  |
| C | -2.19162900 | -4.00018100 | -0.51334600 |
| H | -0.40312900 | -3.92031300 | -1.67679000 |
| C | -2.21716400 | -2.60668200 | 1.44309100  |
| H | -0.46512900 | -1.44700000 | 1.78631100  |
| C | -2.84043900 | -3.52673200 | 0.61654600  |
| H | -2.66924700 | -4.71876900 | -1.14781400 |
| H | -2.70978000 | -2.25532200 | 2.32664900  |
| H | -3.82351600 | -3.87939400 | 0.85592600  |
| O | 1.88286600  | -3.00872000 | -0.79724800 |

|                                              |                             |
|----------------------------------------------|-----------------------------|
| Zero-point correction=                       | 0.393964 (Hartree/Particle) |
| Thermal correction to Energy=                | 0.415871                    |
| Thermal correction to Enthalpy=              | 0.416815                    |
| Thermal correction to Gibbs Free Energy=     | 0.339284                    |
| Sum of electronic and zero-point Energies=   | -1146.496486                |
| Sum of electronic and thermal Energies=      | -1146.474579                |
| Sum of electronic and thermal Enthalpies=    | -1146.473635                |
| Sum of electronic and thermal Free Energies= | -1146.551166                |

Table S42. XYZ coordinates optimized molecular geometry of **B7-trans**.

|   |          |          |          |
|---|----------|----------|----------|
| C | 1.63934  | 1.56174  | 0.43667  |
| C | 0.35481  | 1.93714  | 0.04128  |
| C | -0.51543 | 0.79496  | 0.24269  |
| C | 0.23023  | -0.21386 | 0.73073  |
| N | 1.55647  | 0.22349  | 0.83987  |
| H | -0.0384  | -1.20007 | 1.0186   |
| C | 2.45563  | 3.71923  | -0.06828 |
| C | 1.17635  | 4.10582  | -0.48268 |
| C | 0.11947  | 3.22427  | -0.42506 |

|   |          |          |          |
|---|----------|----------|----------|
| C | 2.70536  | 2.44724  | 0.4013   |
| H | 3.25826  | 4.42795  | -0.10716 |
| H | 1.02018  | 5.1037   | -0.83995 |
| H | -0.86556 | 3.5146   | -0.72856 |
| H | 3.67297  | 2.16331  | 0.75283  |
| N | -1.88705 | 0.84533  | -0.04459 |
| N | -2.52836 | -0.19825 | 0.20116  |
| C | -3.88303 | -0.20775 | -0.06401 |
| C | -4.7546  | 0.78635  | -0.59815 |
| C | -4.67549 | -1.31335 | 0.18033  |
| S | 2.8262   | -0.79029 | 1.35725  |
| O | 2.1038   | -2.02586 | 2.01642  |
| C | -4.26608 | -2.6346  | 0.74288  |
| H | -3.20616 | -2.61654 | 0.94524  |
| H | -4.79522 | -2.84238 | 1.66588  |
| H | -4.47549 | -3.43499 | 0.04242  |
| C | -4.42464 | 2.17704  | -1.03884 |
| H | -3.68641 | 2.16083  | -1.83033 |
| H | -5.32193 | 2.66384  | -1.39573 |
| H | -4.00862 | 2.74818  | -0.21884 |
| C | 3.65967  | -1.27168 | -0.16296 |
| C | 3.0753   | -2.21998 | -0.97251 |
| C | 4.87168  | -0.69038 | -0.45    |
| C | 3.72538  | -2.57903 | -2.13713 |
| H | 2.14569  | -2.67675 | -0.70139 |
| C | 5.51675  | -1.05512 | -1.61831 |
| H | 5.30288  | 0.01537  | 0.22778  |
| C | 4.94098  | -1.99268 | -2.45886 |
| H | 3.29058  | -3.31267 | -2.78373 |
| H | 6.46061  | -0.61406 | -1.86321 |
| H | 5.44211  | -2.27441 | -3.36246 |
| O | 3.81478  | 0.0747   | 2.22545  |
| N | -5.91531 | -0.98486 | -0.18554 |
| N | -5.97615 | 0.32284  | -0.67239 |
| C | -7.35307 | -0.18429 | -0.76093 |
| H | -7.98844 | 0.57713  | -1.16272 |
| H | -7.37674 | -1.04234 | -1.39974 |
| H | -7.69625 | -0.45678 | 0.21522  |

|                                            |                             |
|--------------------------------------------|-----------------------------|
| Zero-point correction=                     | 0.392696 (Hartree/Particle) |
| Thermal correction to Energy=              | 0.416392                    |
| Thermal correction to Enthalpy=            | 0.417336                    |
| Thermal correction to Gibbs Free Energy=   | 0.335770                    |
| Sum of electronic and zero-point Energies= | -1578.661096                |

|                                              |              |
|----------------------------------------------|--------------|
| Sum of electronic and thermal Energies=      | -1578.637399 |
| Sum of electronic and thermal Enthalpies=    | -1578.636455 |
| Sum of electronic and thermal Free Energies= | -1578.718022 |

Table S43. XYZ coordinates optimized molecular geometry of **B7-cis**.

|   |             |             |             |
|---|-------------|-------------|-------------|
| C | 0.86837800  | 1.96910900  | -0.34047400 |
| C | -0.13969800 | 2.53069000  | 0.43756600  |
| C | -1.23347900 | 1.57484400  | 0.50241400  |
| C | -0.86505200 | 0.48665600  | -0.21711600 |
| N | 0.41468100  | 0.69856600  | -0.71692600 |
| H | -1.35896400 | -0.42489400 | -0.43515700 |
| C | 2.19107000  | 3.90579100  | -0.08985200 |
| C | 1.19308400  | 4.47910300  | 0.70628900  |
| C | 0.02244800  | 3.80286300  | 0.97063900  |
| C | 2.04252500  | 2.64569700  | -0.62894900 |
| H | 3.08587300  | 4.45890700  | -0.29252900 |
| H | 1.34281600  | 5.46154500  | 1.10642300  |
| H | -0.75208800 | 4.23696200  | 1.56830900  |
| H | 2.78959700  | 2.22065800  | -1.26381500 |
| N | -2.39284700 | 1.94473000  | 1.21038400  |
| N | -3.42005100 | 1.26442700  | 1.37356500  |
| C | -3.51481100 | -0.07033400 | 0.86469300  |
| C | -3.00123200 | -1.24910600 | 1.46043200  |
| N | -3.33761700 | -2.29991200 | 0.74765700  |
| N | -4.07727900 | -1.81063600 | -0.31322500 |
| C | -4.63187700 | -2.72844300 | -1.30461200 |
| H | -4.32487800 | -2.43840000 | -2.29939200 |
| H | -4.24680800 | -3.70904300 | -1.07962800 |
| H | -5.71180500 | -2.74186400 | -1.25008000 |
| C | -2.19461800 | -1.35323300 | 2.71755700  |
| H | -1.22921900 | -0.87345700 | 2.60070200  |
| H | -2.71056900 | -0.87611500 | 3.54268600  |
| H | -2.03447000 | -2.39423700 | 2.96245000  |
| C | -4.20504900 | -0.46927100 | -0.24651700 |
| C | -4.96340900 | 0.34672200  | -1.24249100 |
| H | -4.51106300 | 0.27709000  | -2.22567400 |
| H | -5.98991800 | 0.00641700  | -1.31694400 |
| H | -4.96559700 | 1.38373500  | -0.93839100 |
| C | 2.55162900  | -1.02357500 | -0.57343500 |
| C | 3.84905600  | -0.83644700 | -0.98159400 |
| C | 2.23680700  | -1.65474800 | 0.61152500  |
| C | 4.87319500  | -1.28250400 | -0.16528700 |
| H | 4.05169300  | -0.35673400 | -1.91570000 |

|   |            |             |             |
|---|------------|-------------|-------------|
| C | 3.26382700 | -2.09475000 | 1.41623000  |
| H | 1.21790800 | -1.80212800 | 0.90671500  |
| C | 4.59383600 | -1.91221900 | 1.03816100  |
| H | 5.88896000 | -1.13914800 | -0.47245400 |
| H | 3.03566800 | -2.58405600 | 2.34163200  |
| O | 1.89989400 | 0.27114300  | -2.89538800 |
| C | 5.70566800 | -2.40354100 | 1.94071700  |
| H | 5.61002900 | -3.47023300 | 2.10918300  |
| H | 6.67610700 | -2.21013300 | 1.50445400  |
| H | 5.65567300 | -1.90571900 | 2.90270800  |
| S | 1.24253900 | -0.45841700 | -1.66541600 |
| O | 0.15491100 | -1.56421100 | -1.95141300 |

|                                              |                             |
|----------------------------------------------|-----------------------------|
| Zero-point correction=                       | 0.421192 (Hartree/Particle) |
| Thermal correction to Energy=                | 0.446840                    |
| Thermal correction to Enthalpy=              | 0.447785                    |
| Thermal correction to Gibbs Free Energy=     | 0.360746                    |
| Sum of electronic and zero-point Energies=   | -1617.427565                |
| Sum of electronic and thermal Energies=      | -1617.401917                |
| Sum of electronic and thermal Enthalpies=    | -1617.400973                |
| Sum of electronic and thermal Free Energies= | -1617.488012                |

## Reference

- S1 Z. Zhang, Y. He, Y. Zhou, C. Yu, L. Han and T. Li, *Chem. Eur. J.*, 2019, **25**, 13402 – 13410.
- S2 G. Raina, P. Kannaboina, N. Mupparapu, S. Raina, Q. N. Ahmed and P. Das, *Org. Biomol. Chem.*, 2019, **17**, 2134–2147.
- S3 S. K. Banjare, T. Nanda, B. V. Pati, G. K. D. Adhikari, J. Dutta and P. C. Ravikumar, *ACS Catal.*, 2021, **11**, 11579–11587.
- S4 W. J. Kerr, D. M. Lindsay, P. K. Owens, M. Reid, T. Tuttle and S. Campos, *ACS Catal.*, 2017, **7**, 7182–7186.
- S5 Frisch, M. J.; Trucks, G. W.; Schlegel, H. B.; Scuseria, G. E.; Robb, M. A.; Cheeseman, J. R.; Scalmani, G.; Barone, V.; Mennucci, B.; Petersson, G. A.; Nakatsuji, H.; Caricato, M.; Li, X.; Hratchian, H. P.; Izmaylov, A. F.; Bloino, J.; Zheng, G.; Sonnenberg, J. L.; Hada, M.; Ehara, M.; Toyota, K.; Fukuda, R.; Hasegawa, J.; Ishida, M.; Nakajima, T.; Honda, Y.; Kitao, O.; Nakai, H.; Vreven, T.; Montgomery, J. A.; Peralta, Jr. J. E.; Ogliaro, F.; Bearpark, M.; Heyd, J. J.; Brothers, E.; Kudin, K. N.; Staroverov, V. N.; Kobayashi, R.; Normand, J.; Raghavachari, K.; Rendell, A.; Burant, J. C.; Iyengar, S. S.; Tomasi, J.; Cossi, M.; Rega, N.; Millam, J. M.; Klene, M.; Knox, J. E.; Cross, J. B.; Bakken, V.; Adamo, C.; Jaramillo, J.; Gomperts, R.; Stratmann, R. E.; Yazyev, O.; Austin, A. J.; Cammi, R.; Pomelli, C.; Ochterski, J. W.; Martin, R. L.; Morokuma, K.; Zakrzewski, V. G.; Voth, G. A.; Salvador, P.; Dannenberg, J. J.; Dapprich, S.; Daniels, A. D.; Farkas, Ö.; Foresman, J. B.; Ortiz, J. V.; Cioslowski, J.; Fox, D. J. *Gaussian, Inc. Wallingford CT*, 2009.

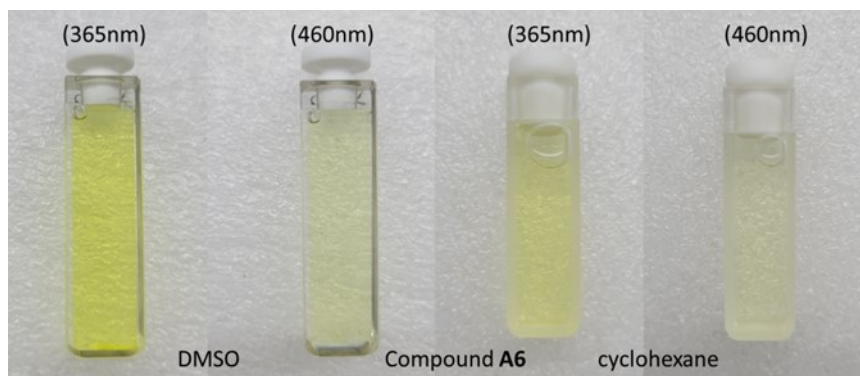

Photochromism of compounds in different polar solvents

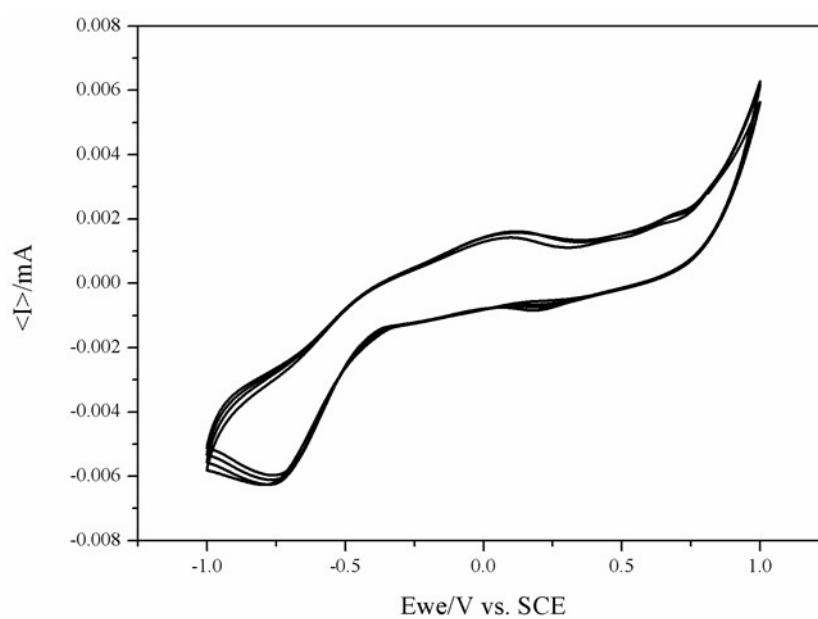

Cyclic voltammetry of 0.01 mM compound **C1** and 0.05M tetrabutylammonium perchlorate in DMSO (25 mL), The working electrode is platinum electrode and the reference electrode is calomel electrode (cycle number: 4)
